# Supplementary material for: An efficient synthesis of dihydro- and tetrahydropyrans via oxonium–ene cyclization reaction
Source: Royal Society of Chemistry journal article supplement (doi:10.1039/c1ob00033k), 2011-01-01
Supplement: c1ob00033k.pdf [file c1ob00033k.pdf]

## Supporting Information for publication

### An Efficient Synthesis of Dihydro- and Tetrahydropyran via Oxonium-Ene Cyclization Reaction

S. Bondalapati, U. C. Reddy, Pipas Saha and Anil K. Saikia\*

Department of Chemistry, Indian Institute of Technology Guwahati, Guwahati 781039, India

[asaikia@iitg.ernet.in](mailto:asaikia@iitg.ernet.in)

**Supplementary information:** General Experimental Section,  $^1\text{H}$  NMR data **8a**,  $^1\text{H}$  and  $^{13}\text{C}$  NMR spectra of all compounds, Crystal structure & Crystallographic data of **6e**, **10** and **17j**.

#### General Experimental Section

Melting points are uncorrected.  $^1\text{H}$  NMR spectra were recorded in  $\text{CDCl}_3$  on Varian AS 400 (400 MHz) spectrometer using TMS as internal standard.  $^{13}\text{C}$  and  $^{19}\text{F}$  NMR spectra were obtained on Varian AS 400 operating at 100 MHz and 376 MHz, respectively. IR spectra were recorded on Nicolet Impact 410 FT-IR spectrometer. Mass spectra were recorded using Waters LC-MS/MS system (Q-TOF–Premier). HRMS (ESCI-TOF) were calibrated with sodium formate solution and leucine enkephalin (SIGMA) was used as an external standard. Elemental analysis was performed on Perkin Elmer 2400 Series II CHNS analyser.

**$^1\text{H}$  NMR of 8a:**  $^1\text{H}$  NMR (400 MHz,  $\text{CDCl}_3$ ):  $\delta$  2.20-2.25 (m, 1 H), 2.28-2.36 (m, 1 H), 2.40-2.48 (m, 2 H), 3.56 (dt,  $J = 12.4$  and  $1.8$  Hz, 1 H), 4.24 (dd,  $J = 10.4$  and  $5.2$  Hz, 1 H), 4.29 (dd,  $J = 11.2$  and  $2.4$  Hz, 1 H), 4.78-4.82 (m, 2 H), 7.22-7.29 (m, 2 H, ArH), 7.34-7.40 (m, 3 H, ArH).

<sup>1</sup>H NMR of **6a**

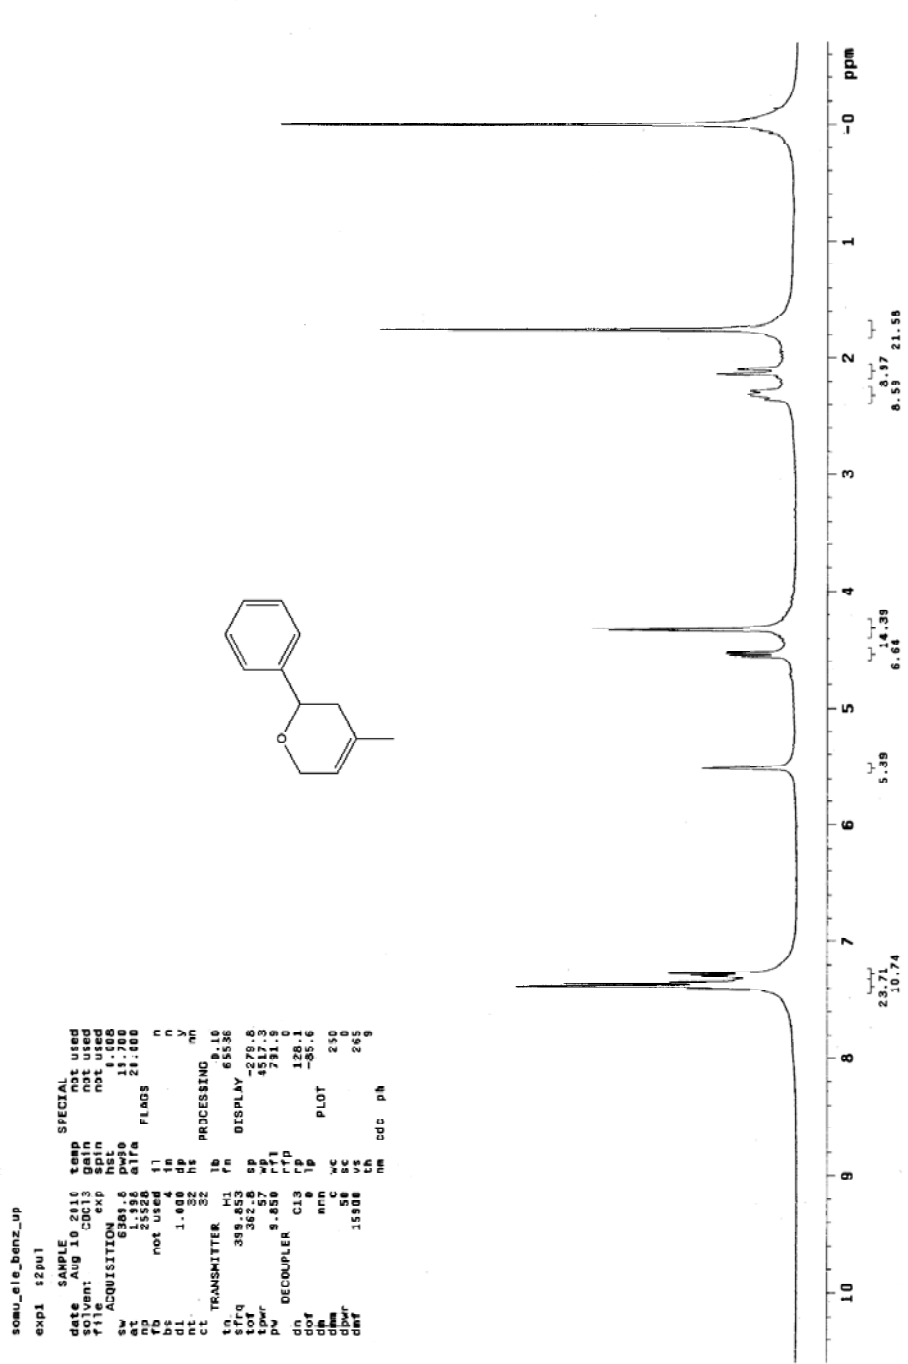

$^{13}\text{C}$  NMR of **6a**

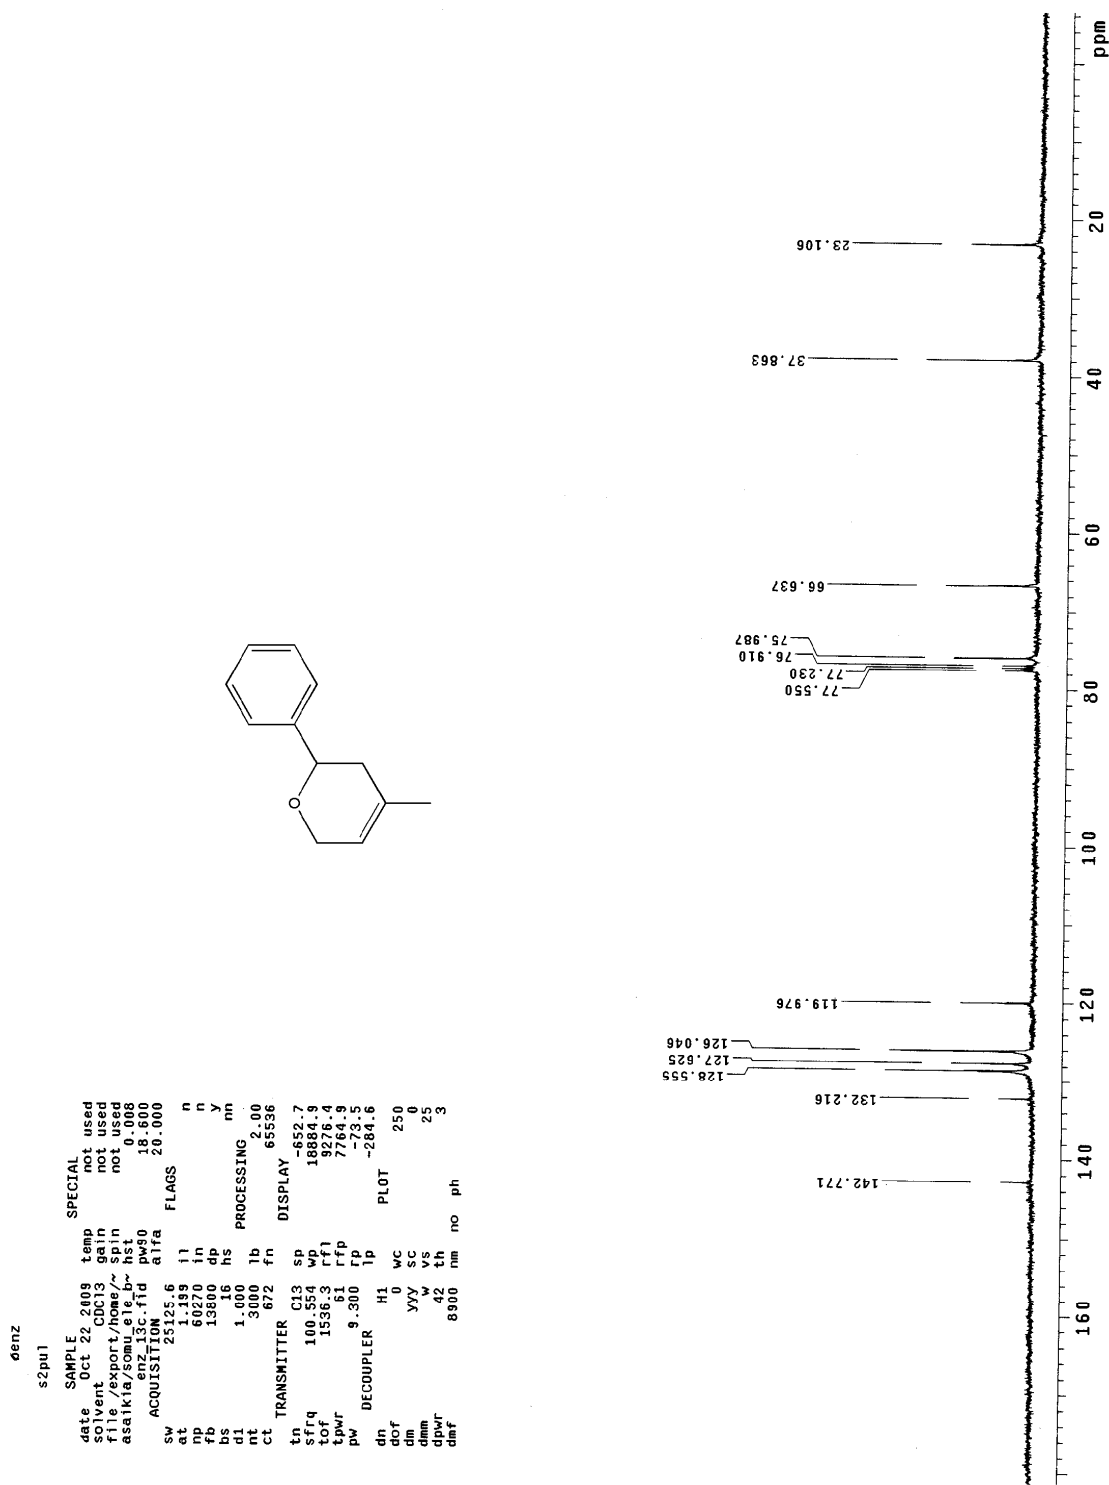

<sup>1</sup>H NMR of **6b**

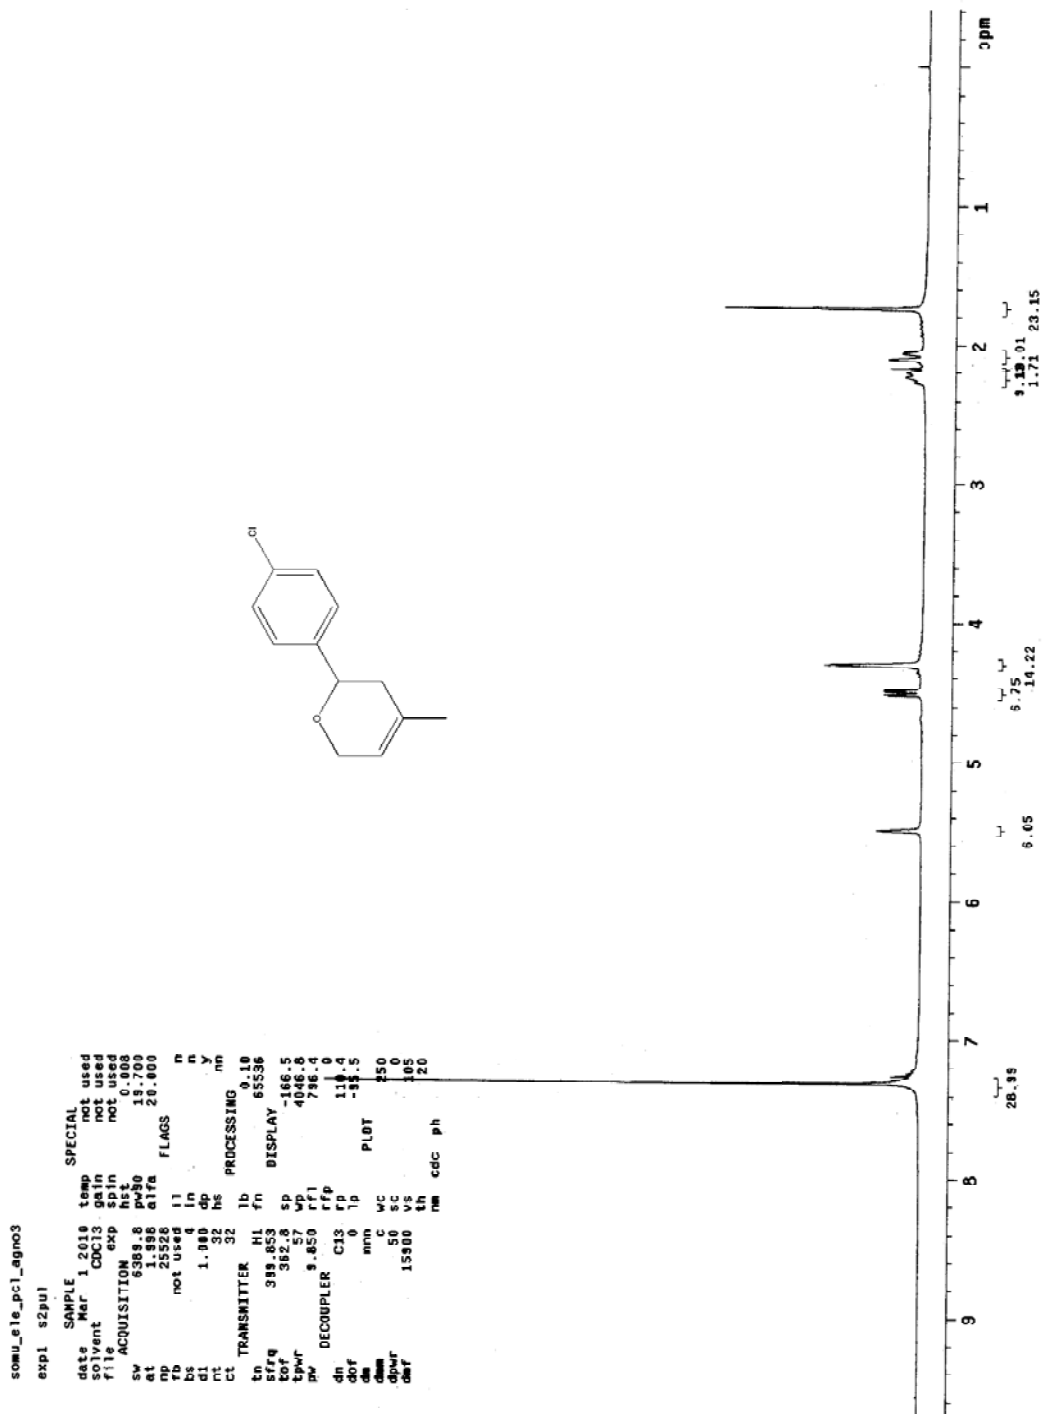



<sup>13</sup>C NMR of **6b**

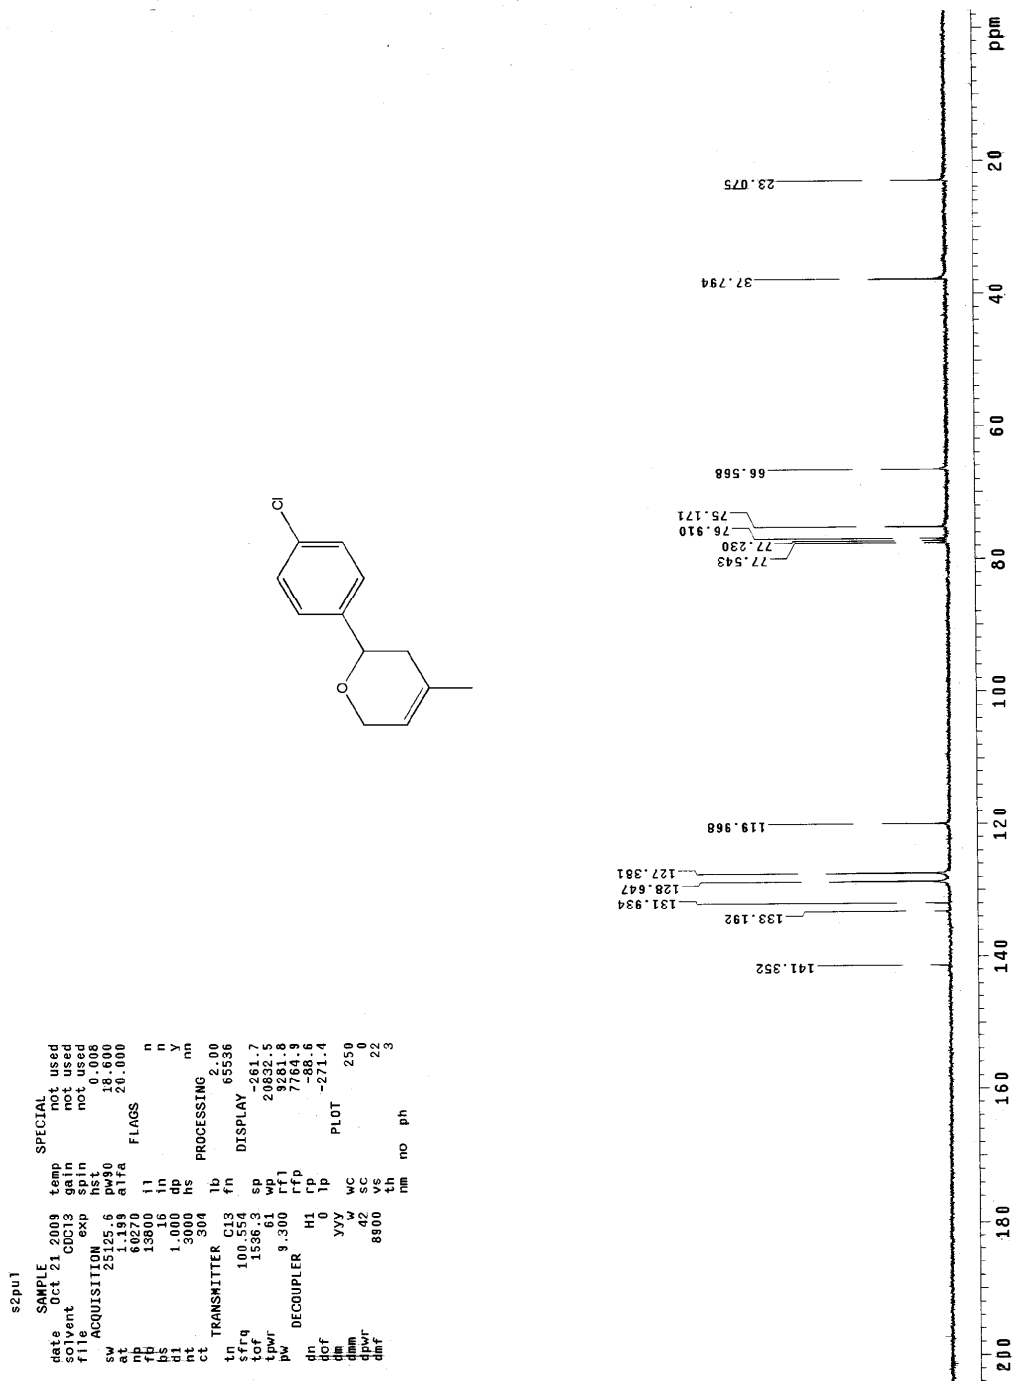

<sup>1</sup>H NMR of 6c

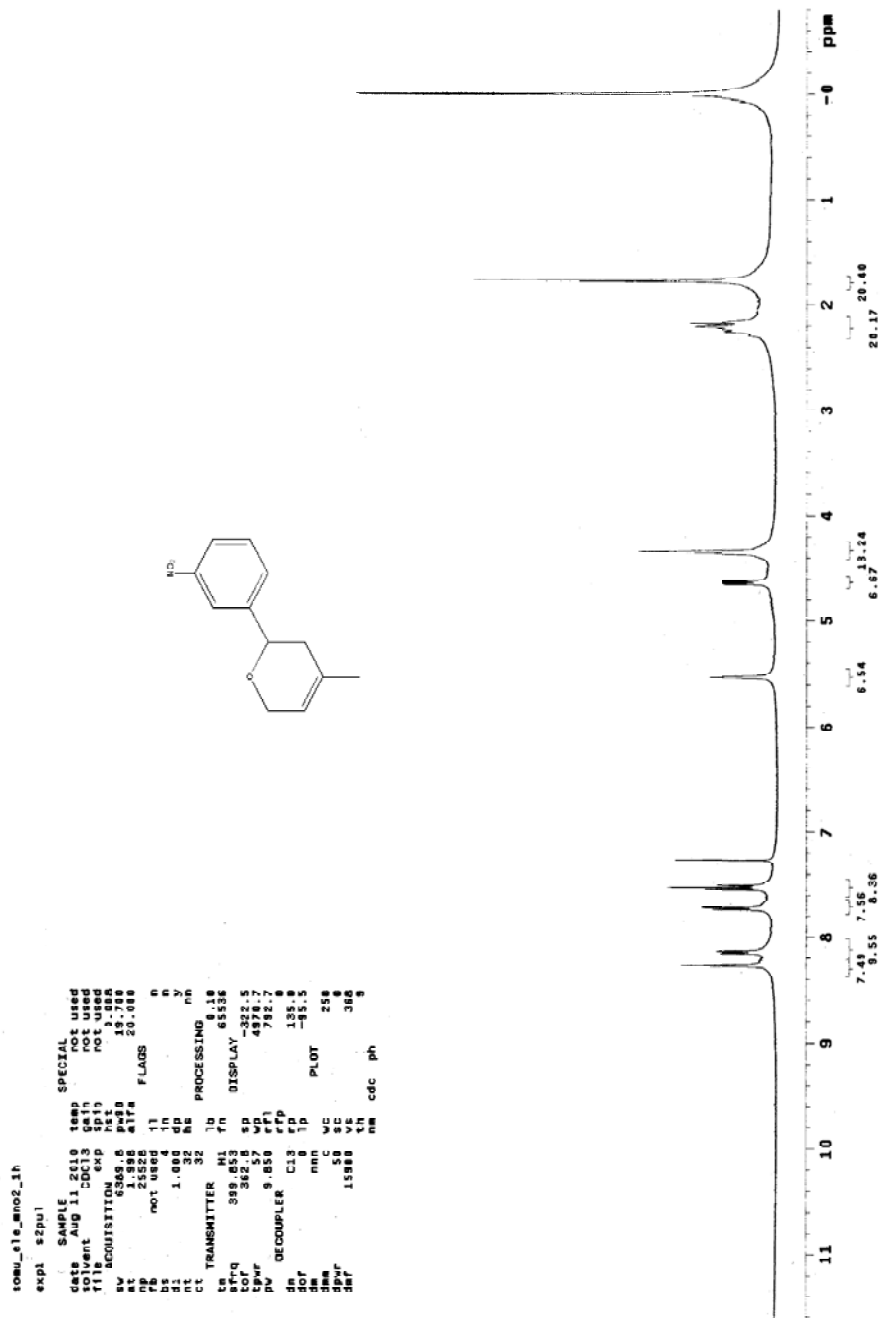

<sup>13</sup>C NMR of 6c

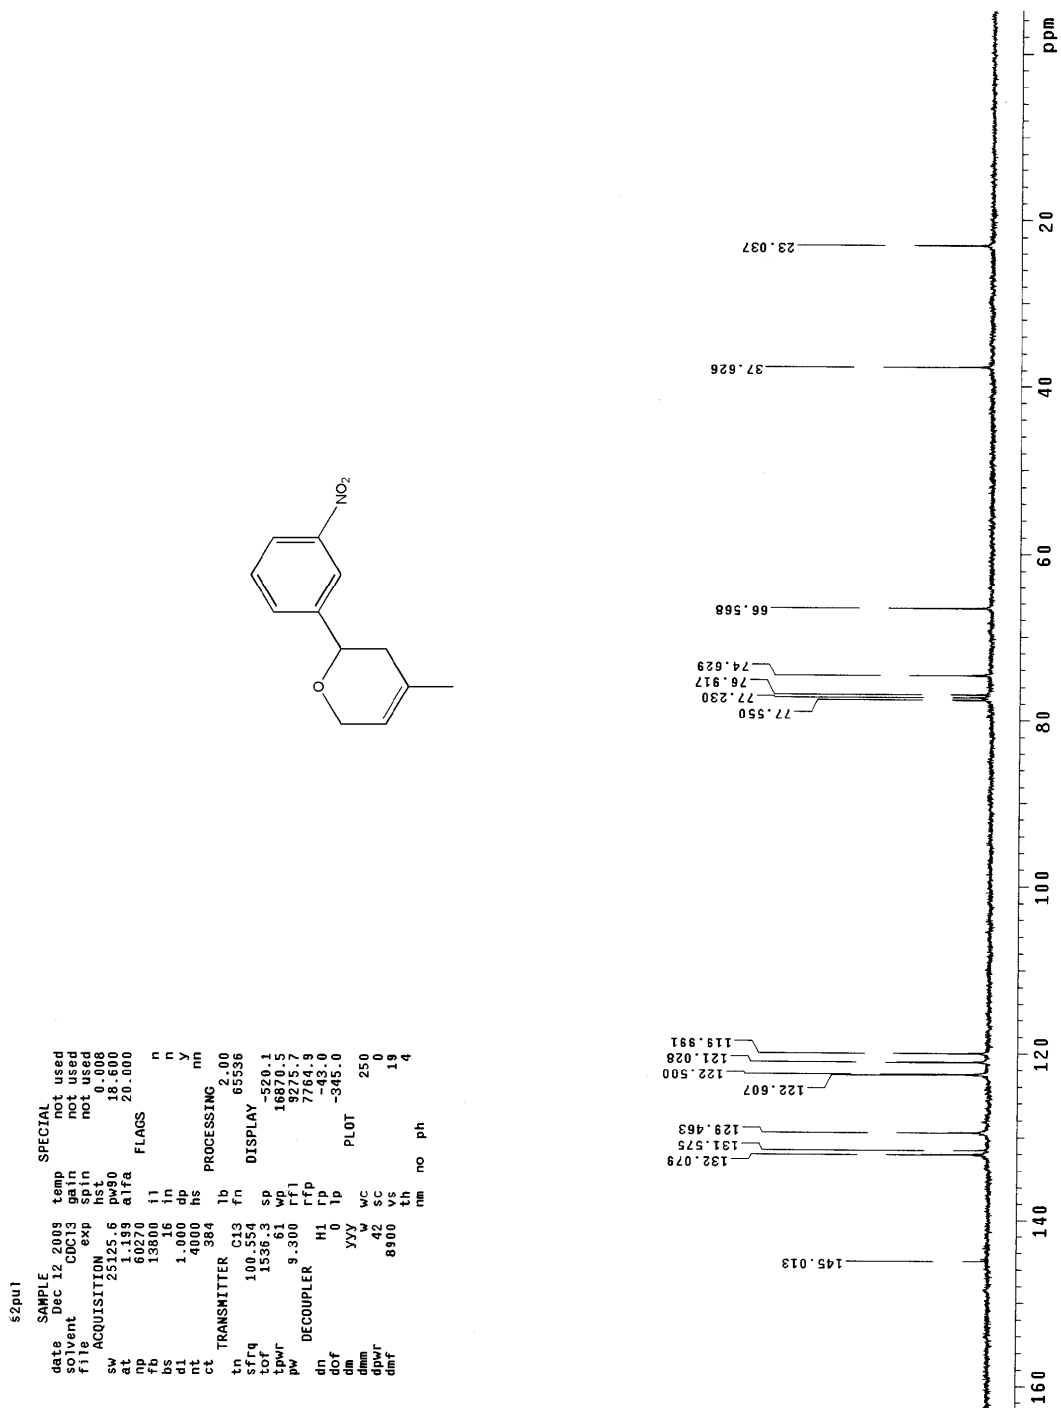

<sup>1</sup>H NMR of 6d

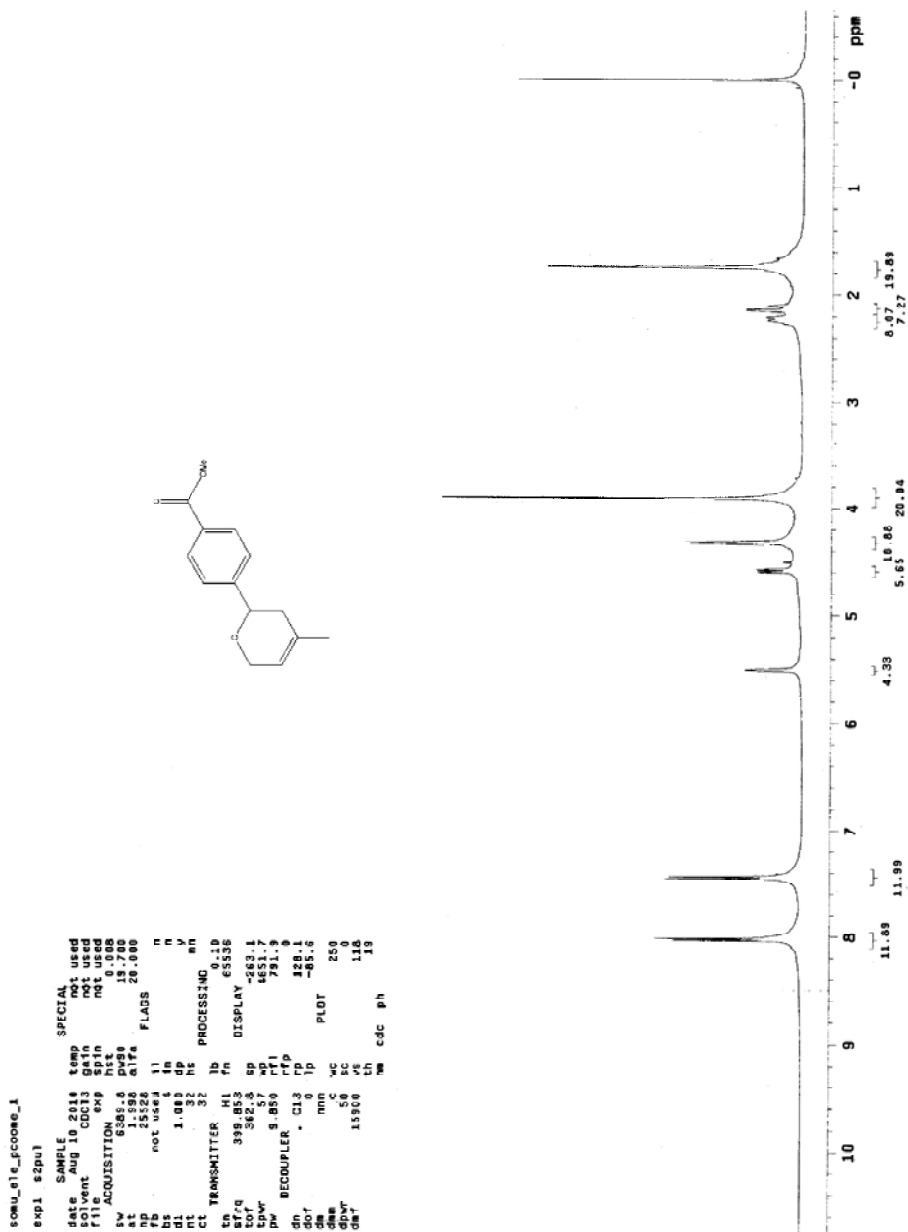

<sup>13</sup>C NMR of **6d**

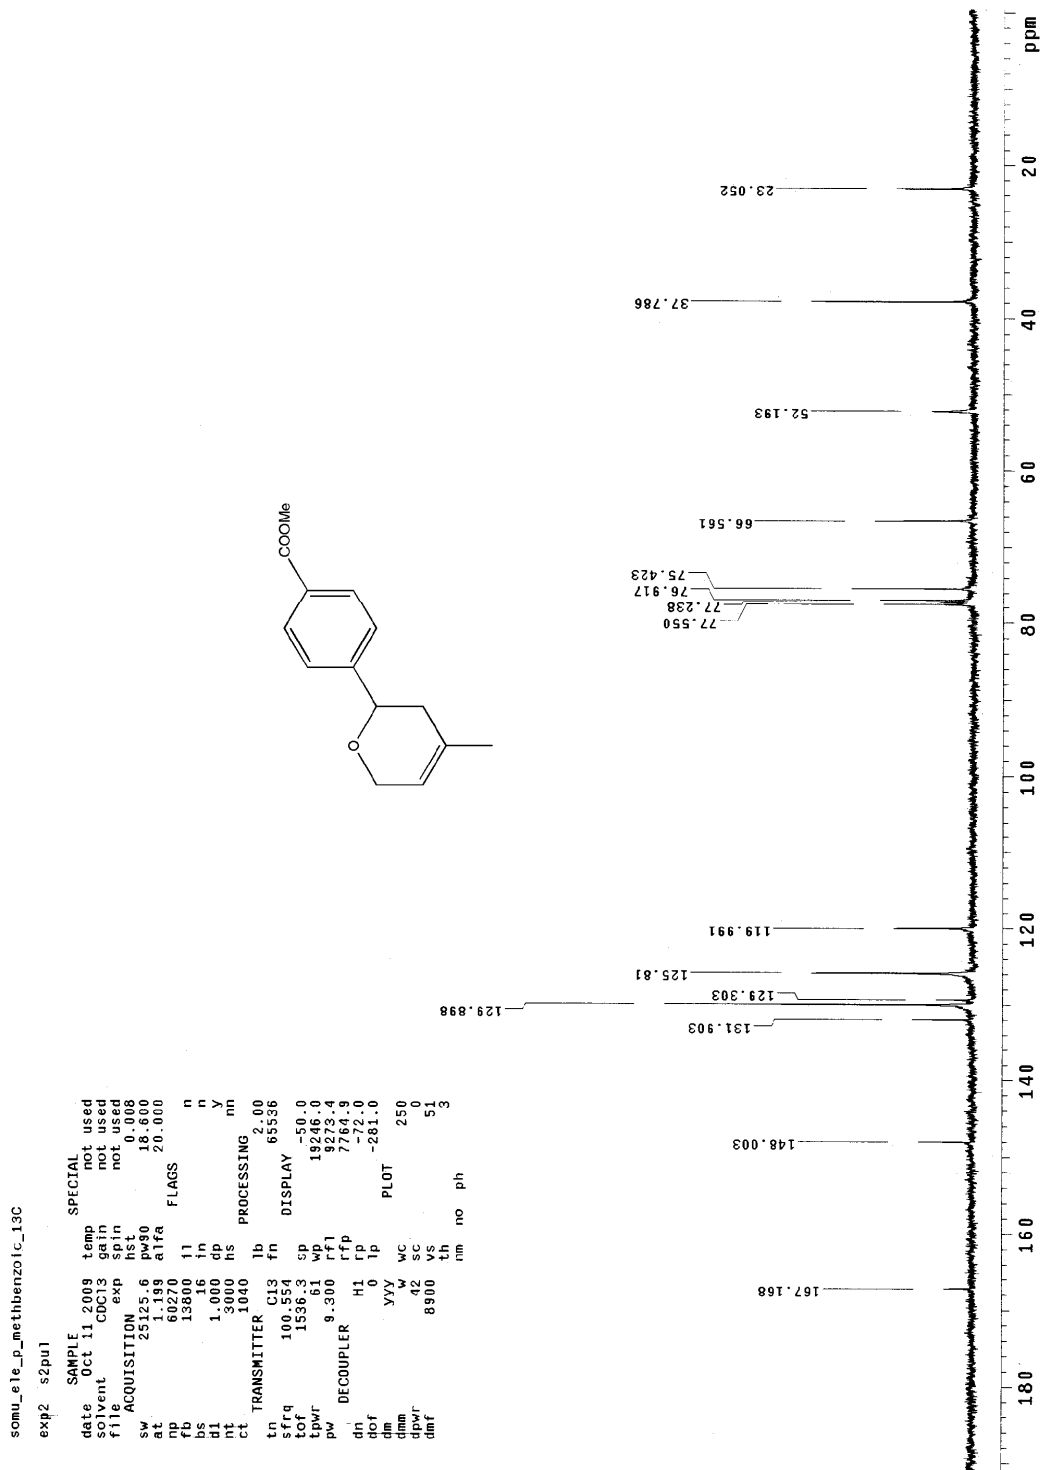

<sup>1</sup>H NMR of 6e

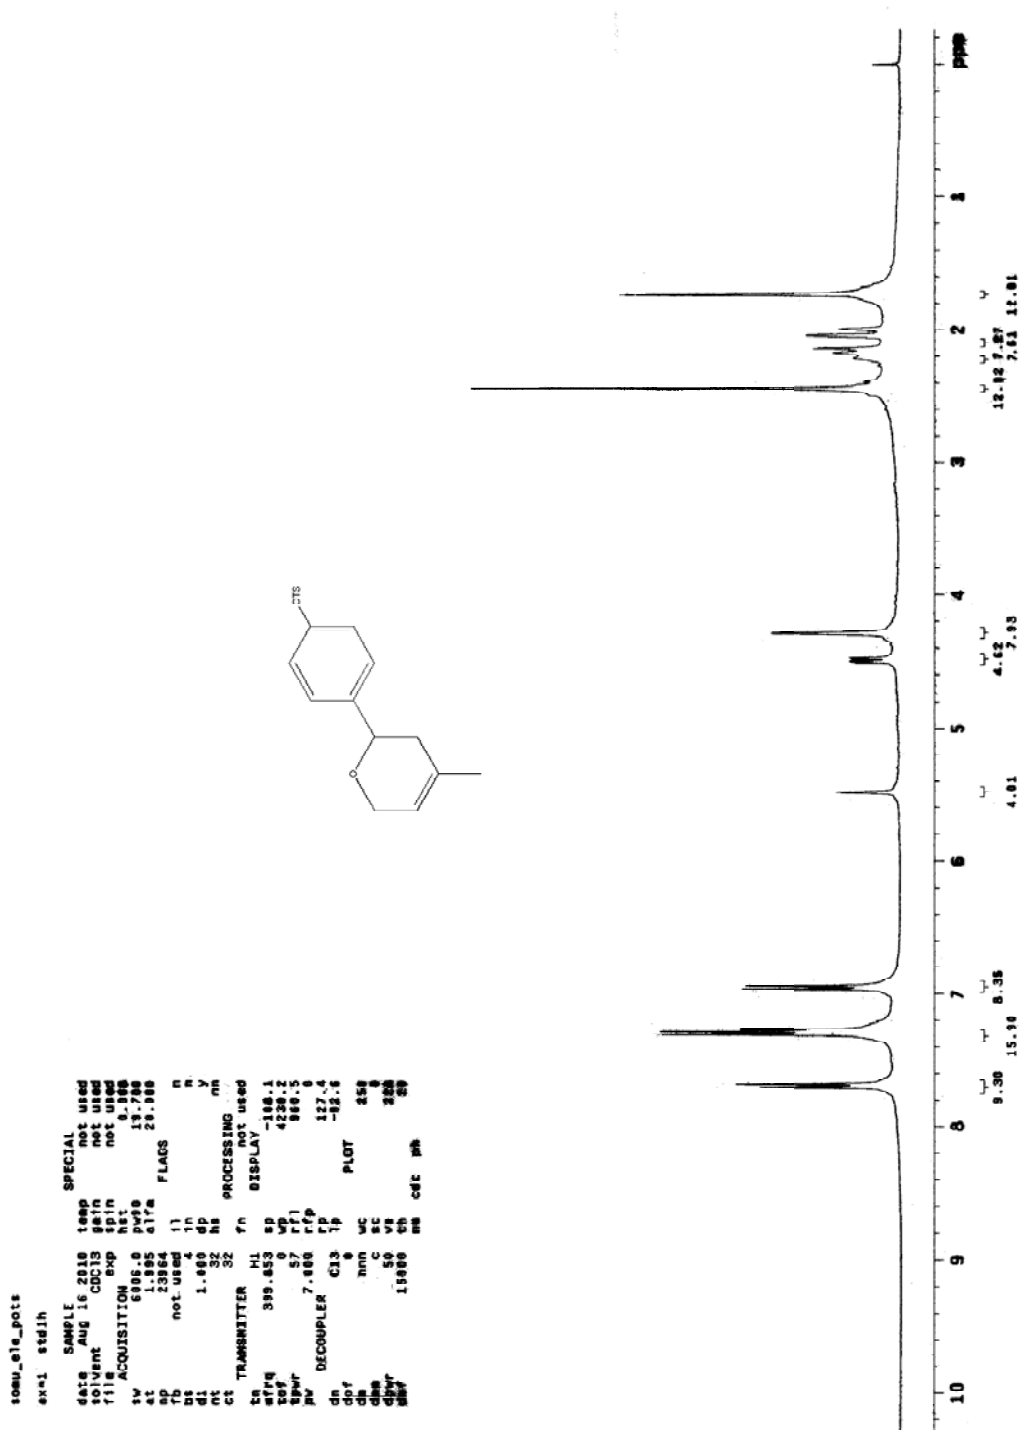

<sup>13</sup>C NMR of **6e**

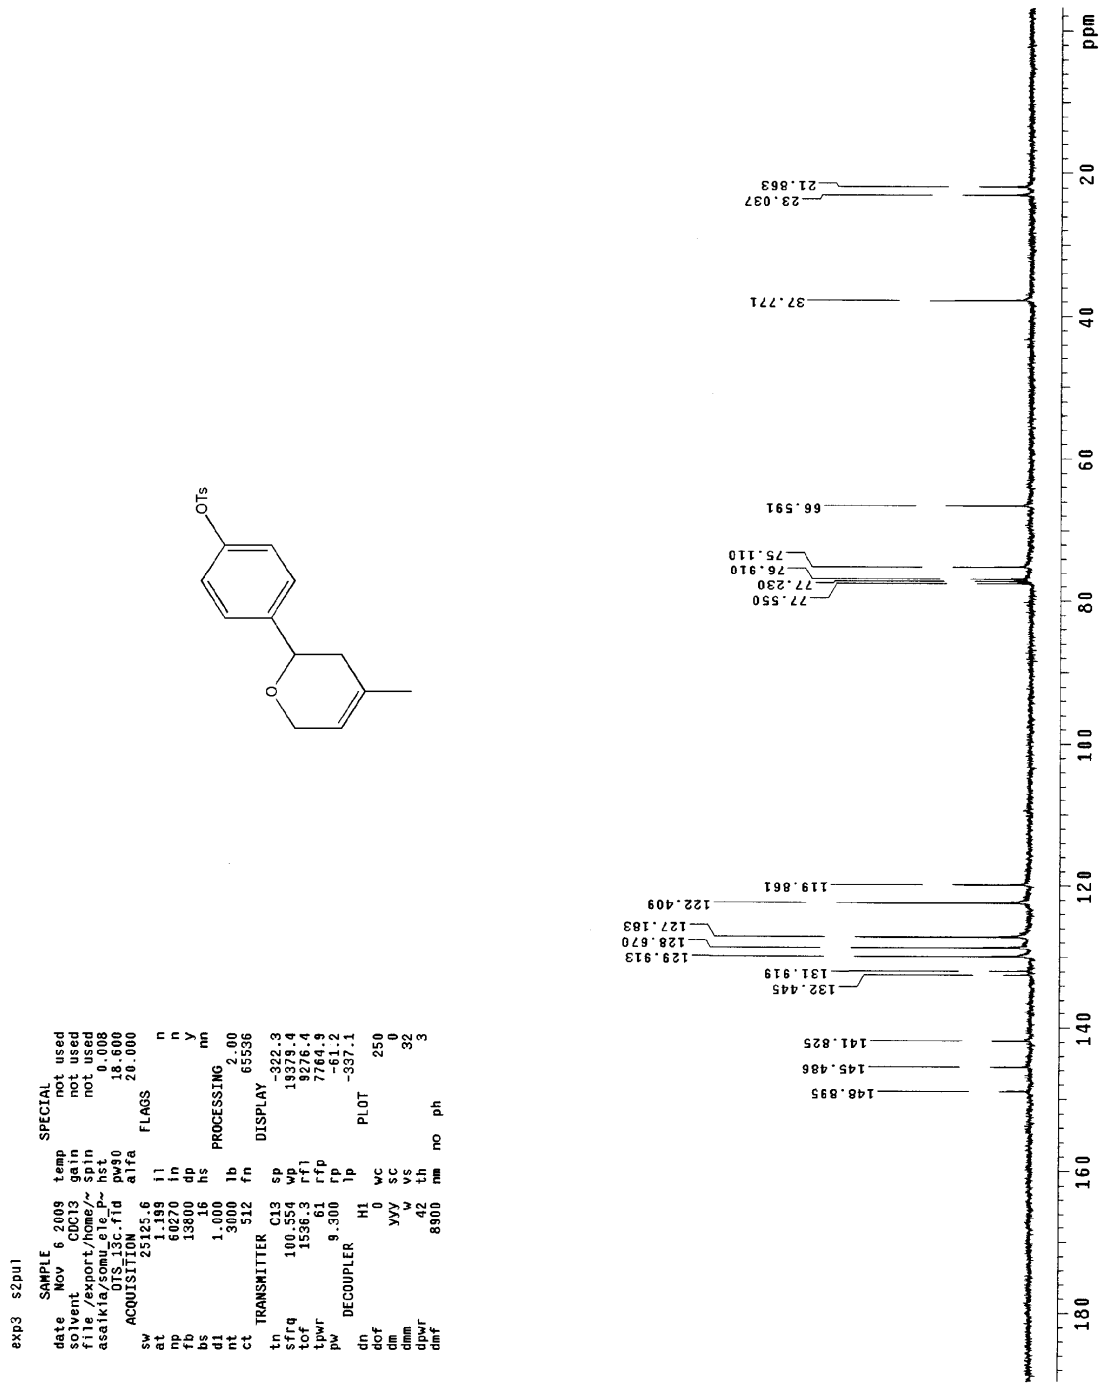

<sup>1</sup>H NMR of **6f**

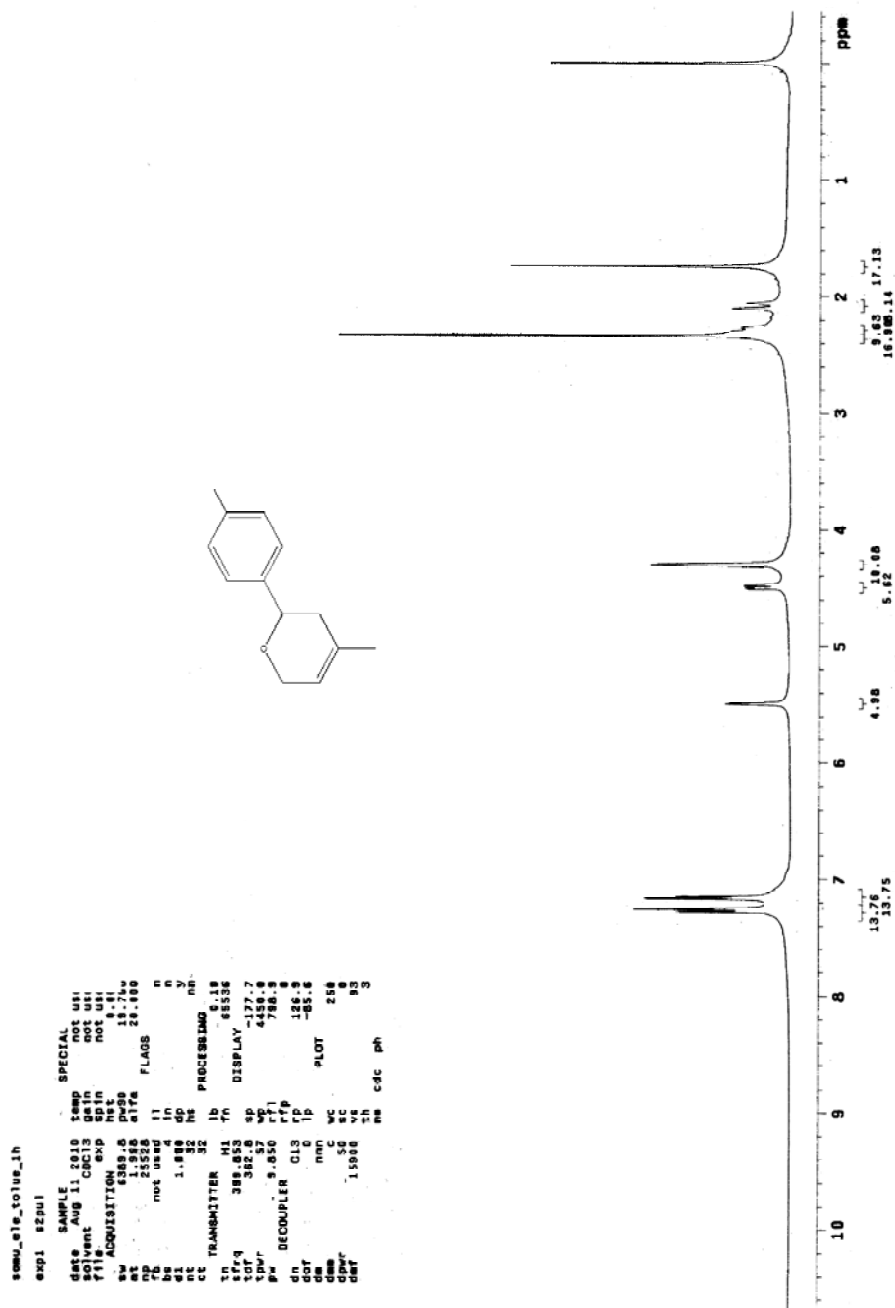



<sup>13</sup>C NMR of **6f**

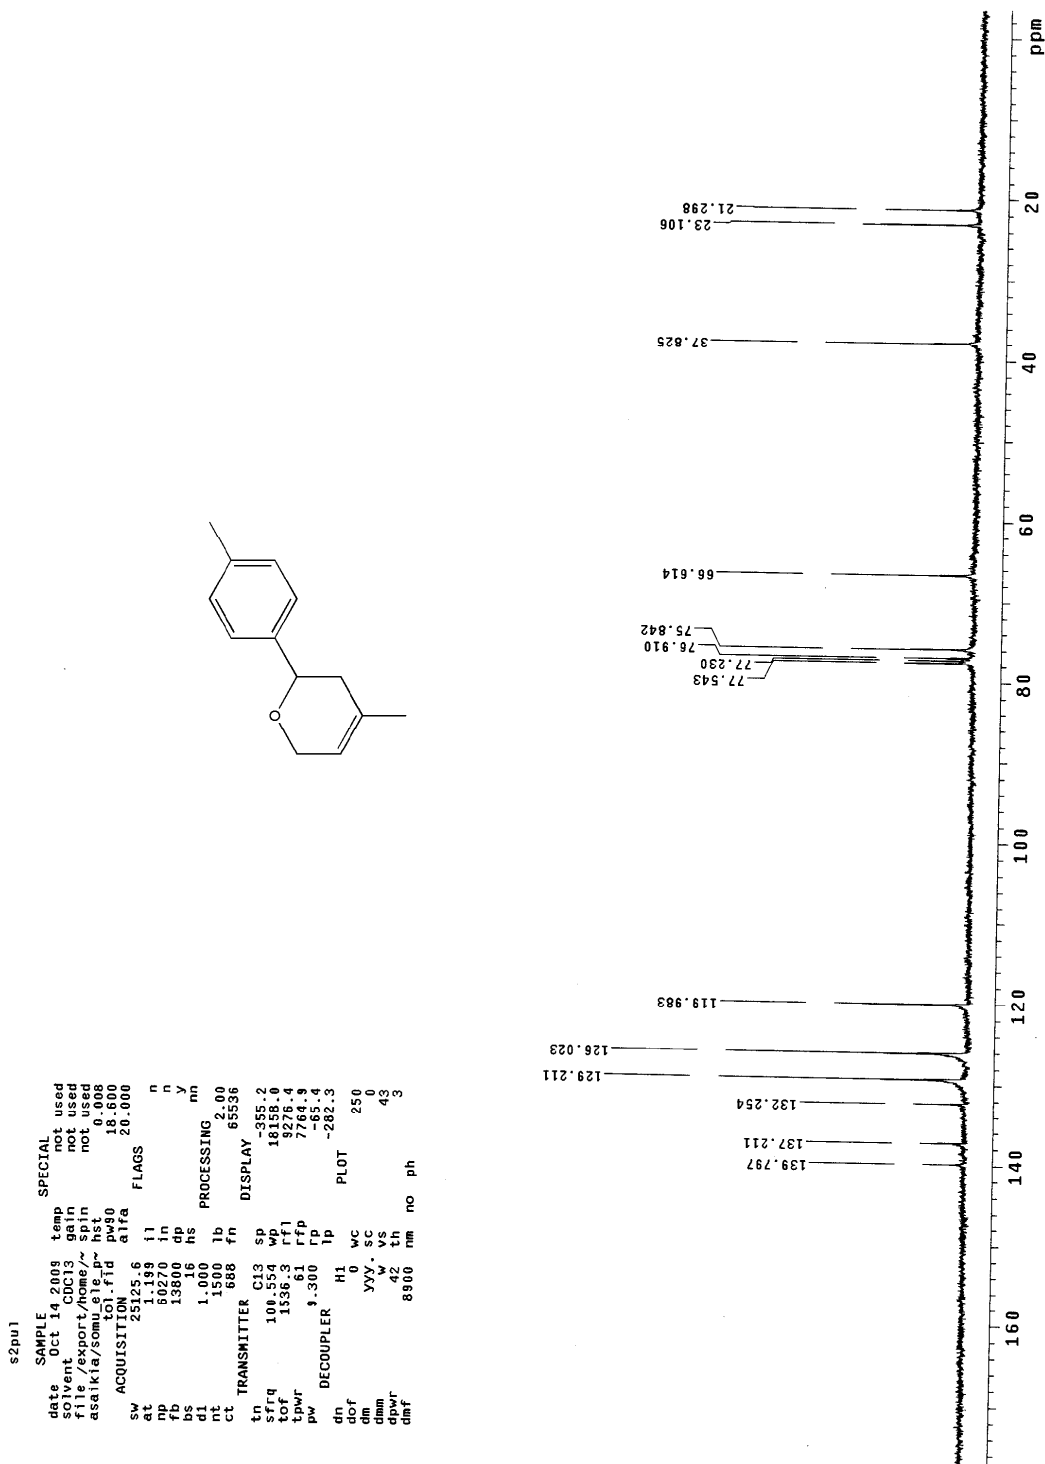

<sup>1</sup>H NMR of 6g

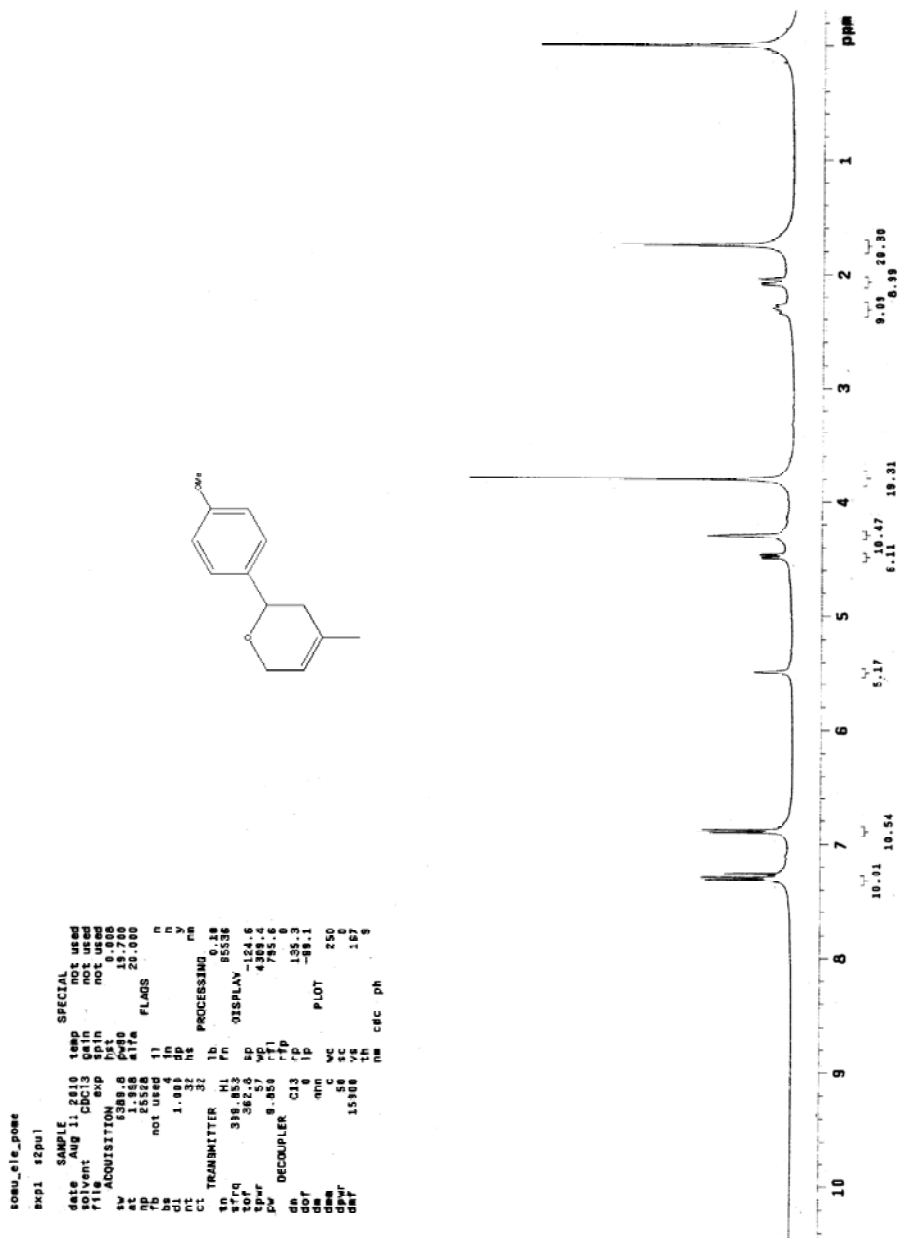

<sup>13</sup>C NMR of 6g

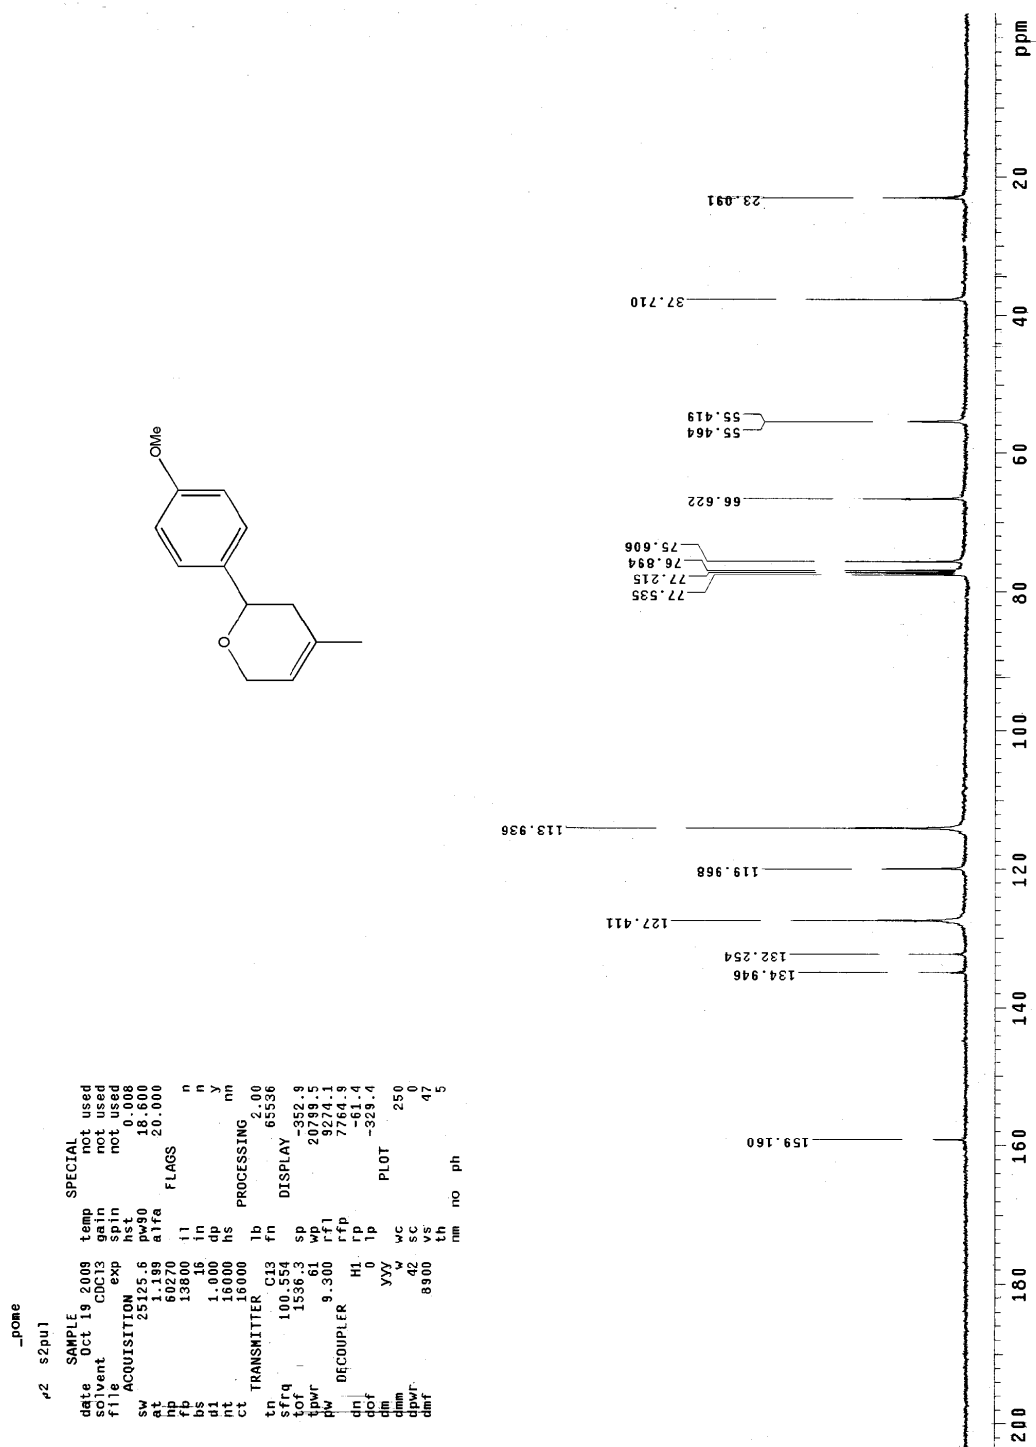

<sup>1</sup>H NMR of **6h** & **7h**

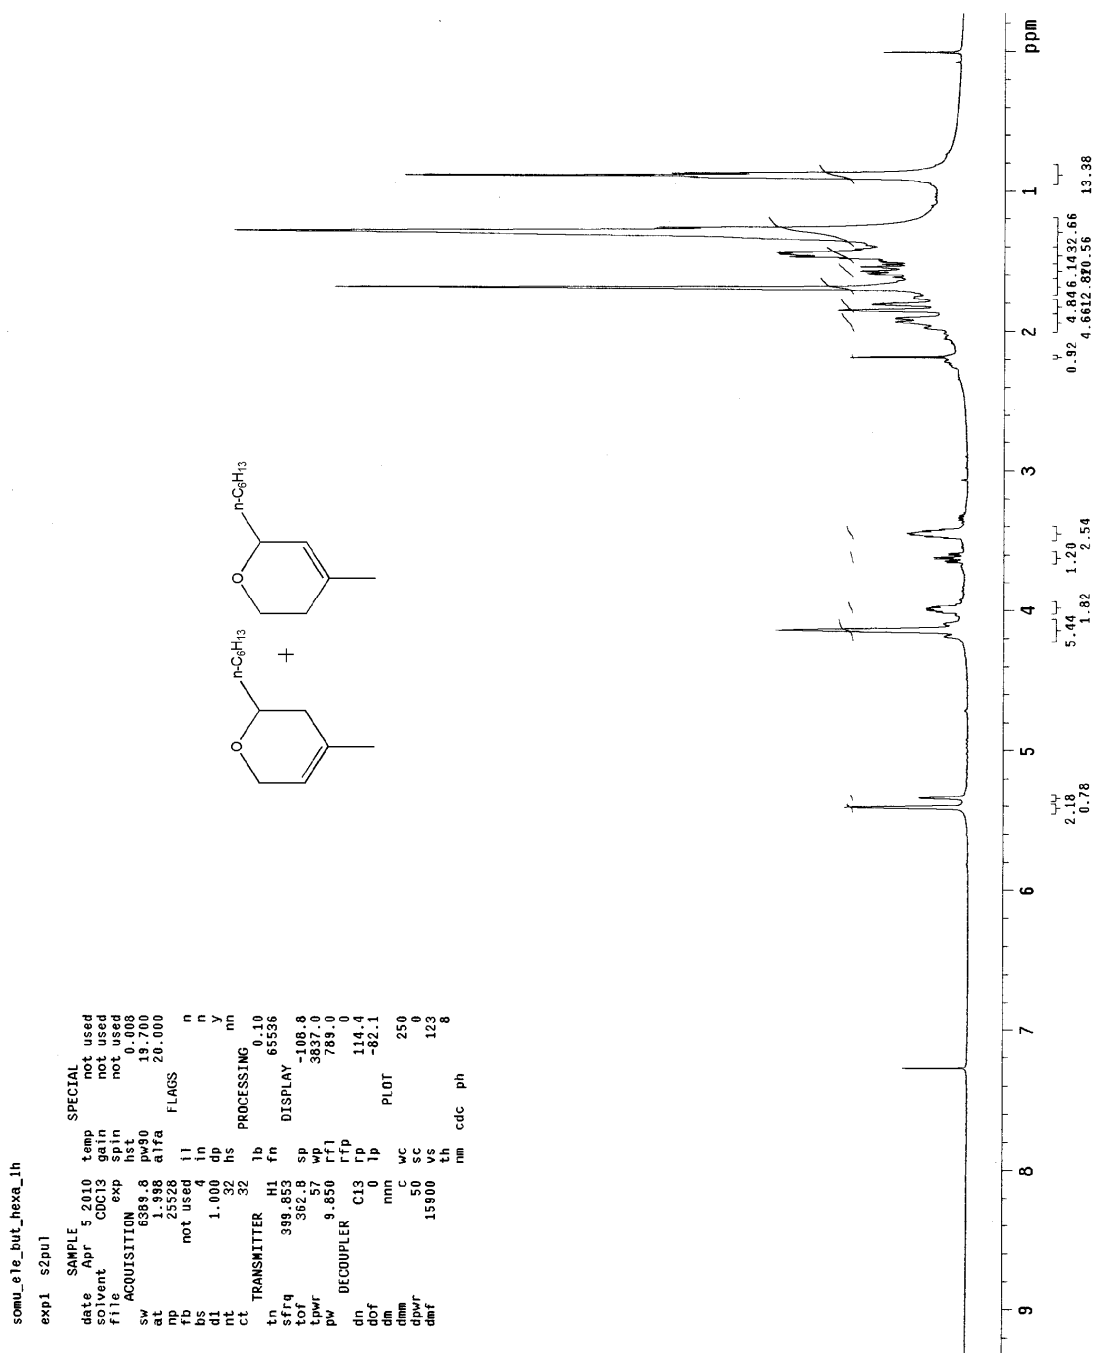

$^{13}\text{C}$  NMR of **6h** & **7h**

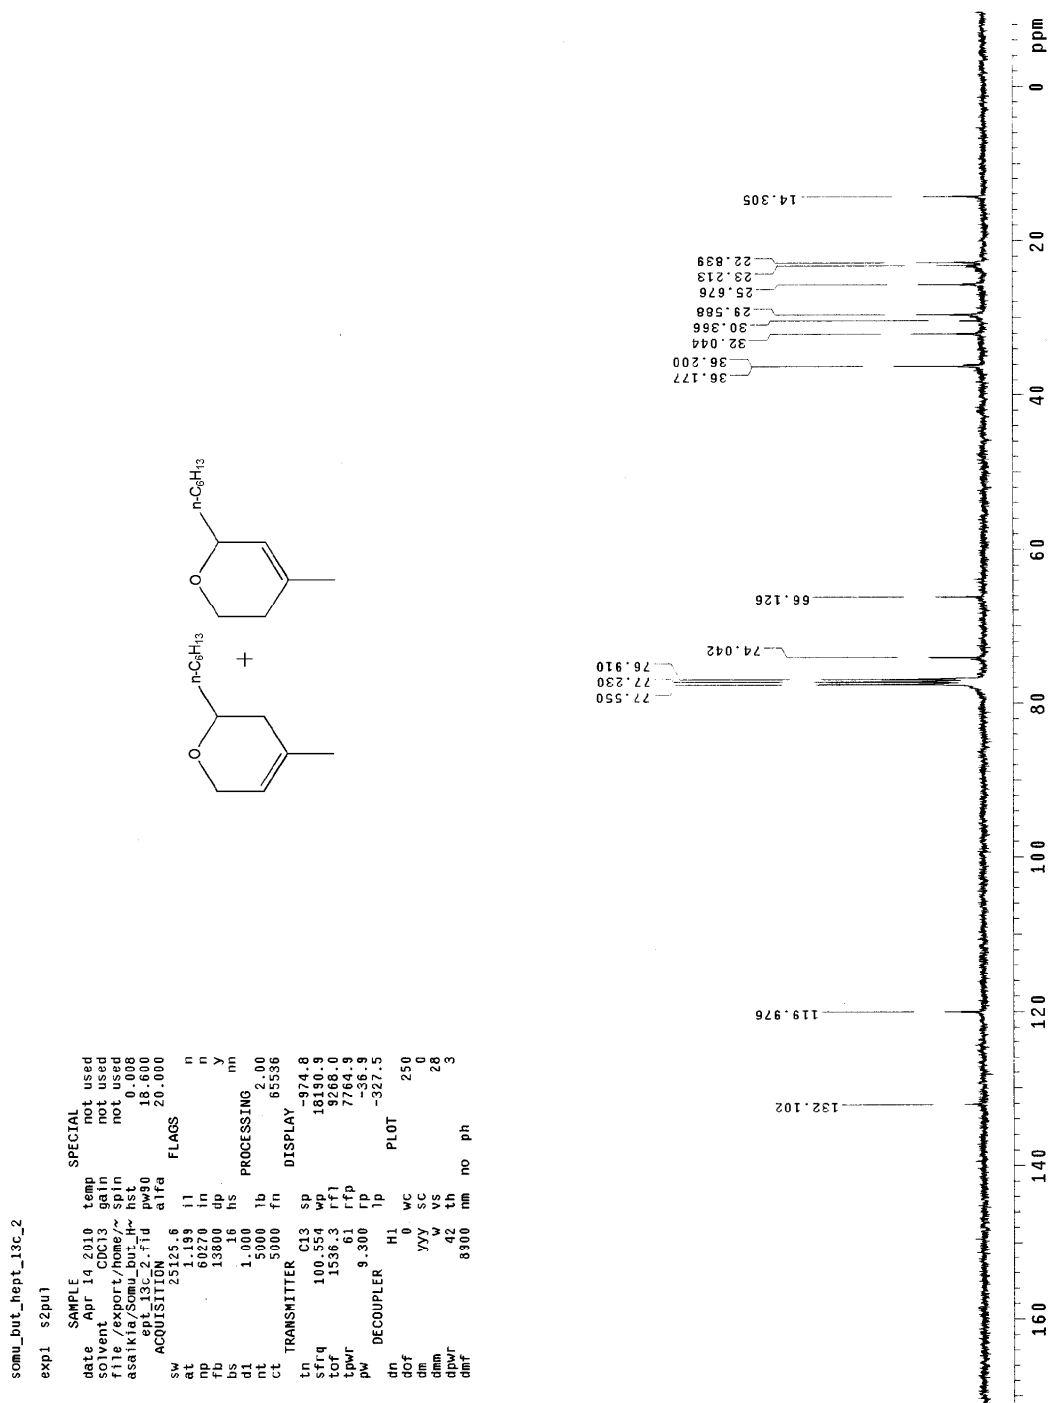

<sup>1</sup>H NMR of **6i** & **7i**

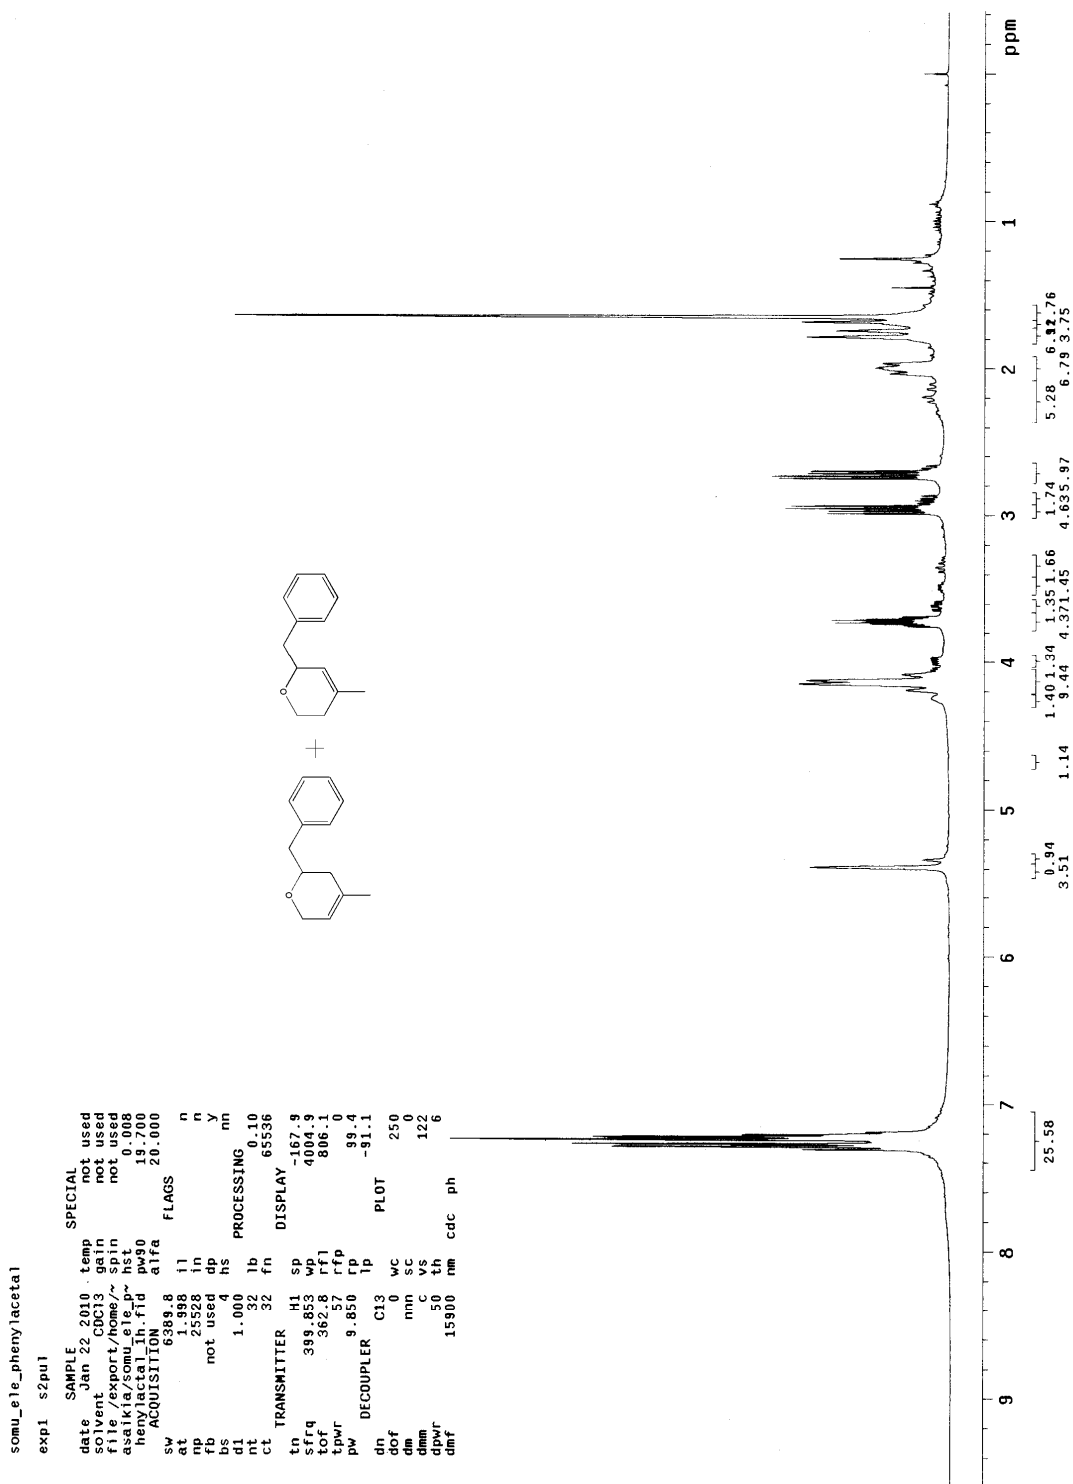

<sup>13</sup>C NMR of **6i**

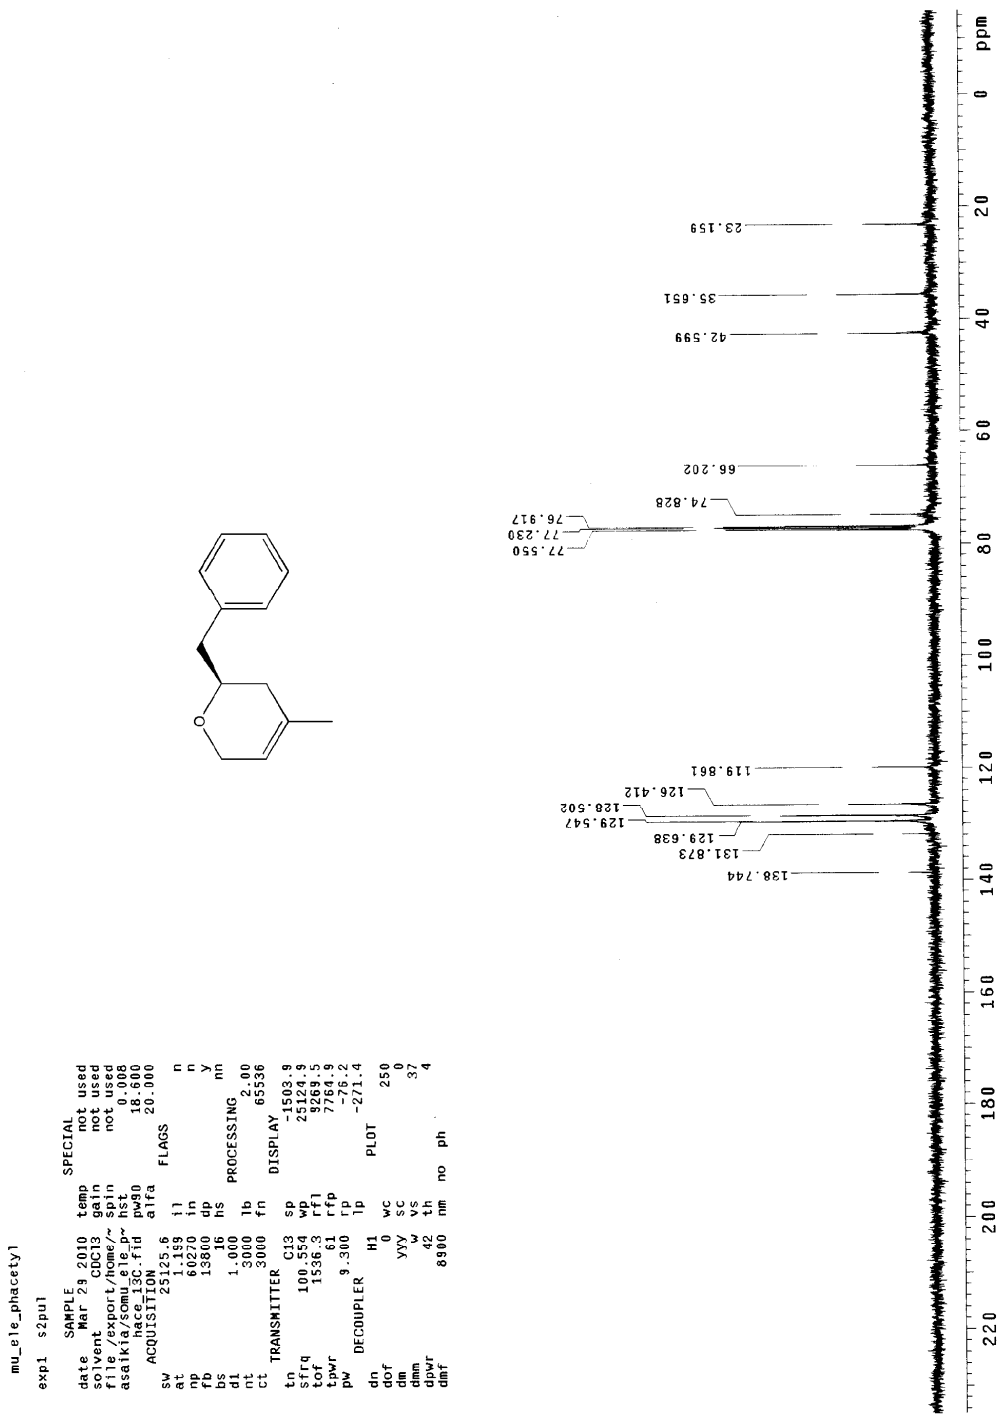

# Hydrogenation product of **6i** & **7i**

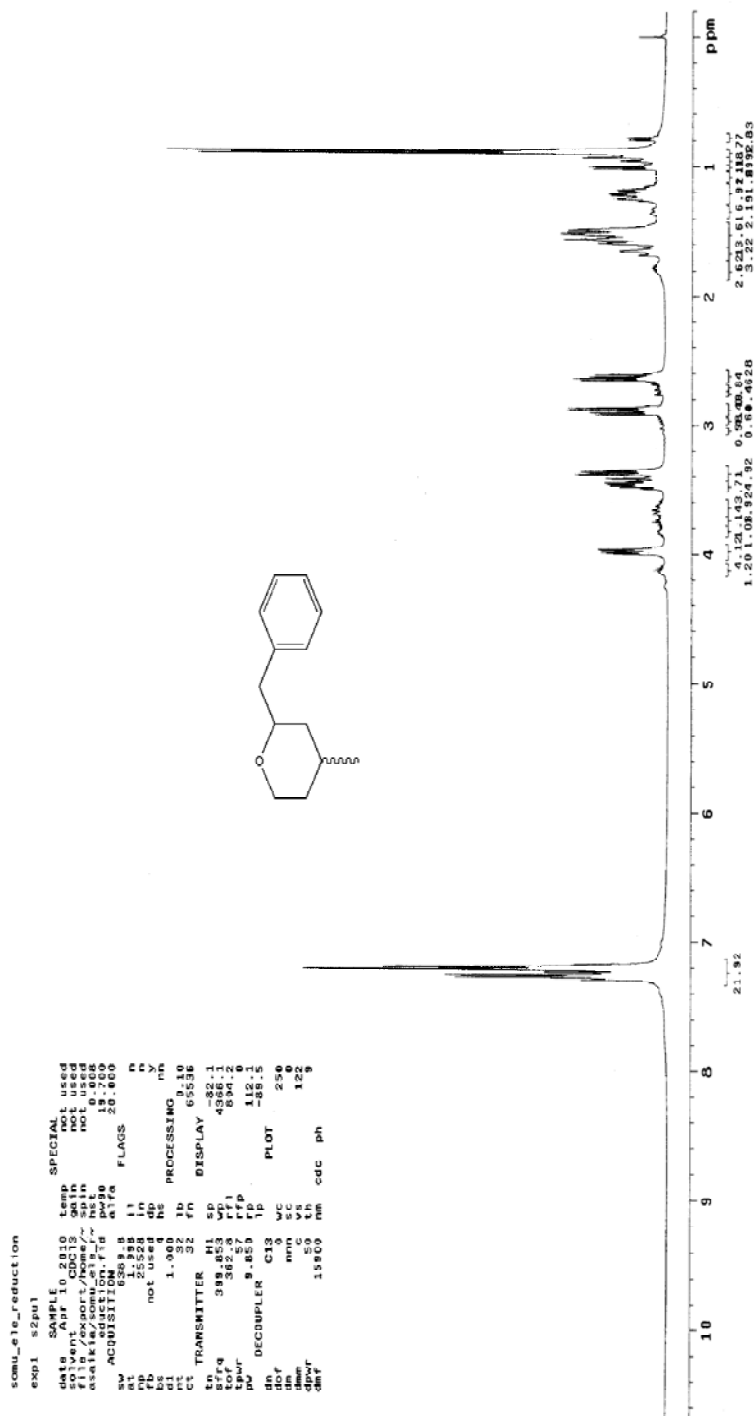



$^{13}\text{C}$  NMR of hydrogenation product of **6i** & **7i** (Major product)

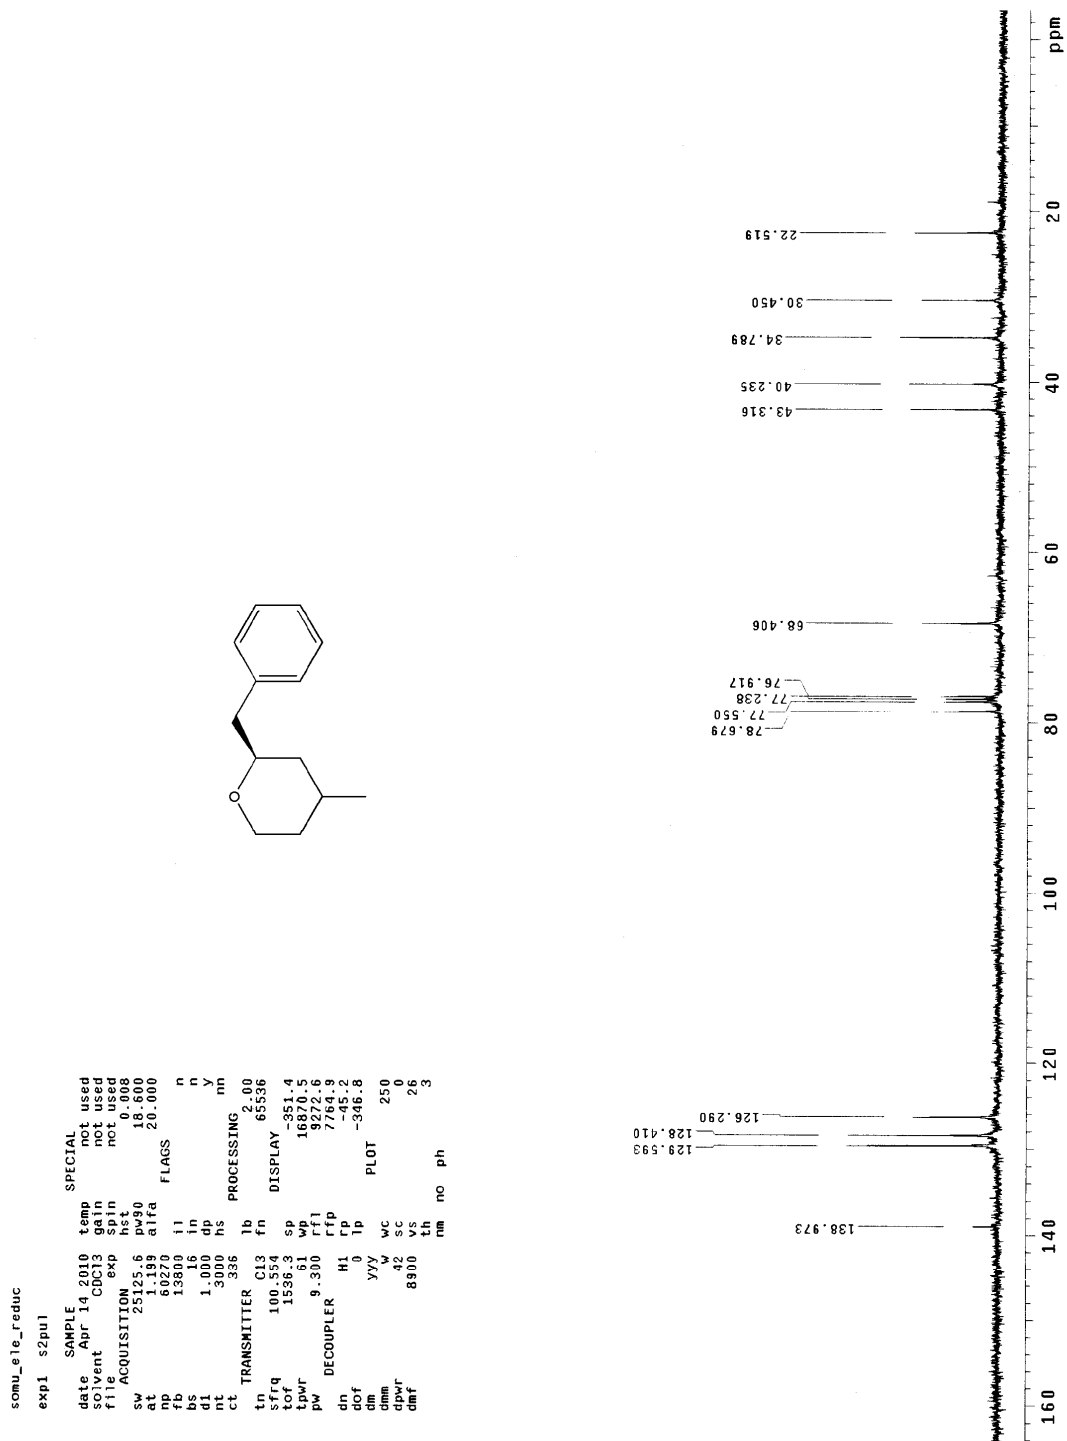

<sup>1</sup>H NMR of 6j

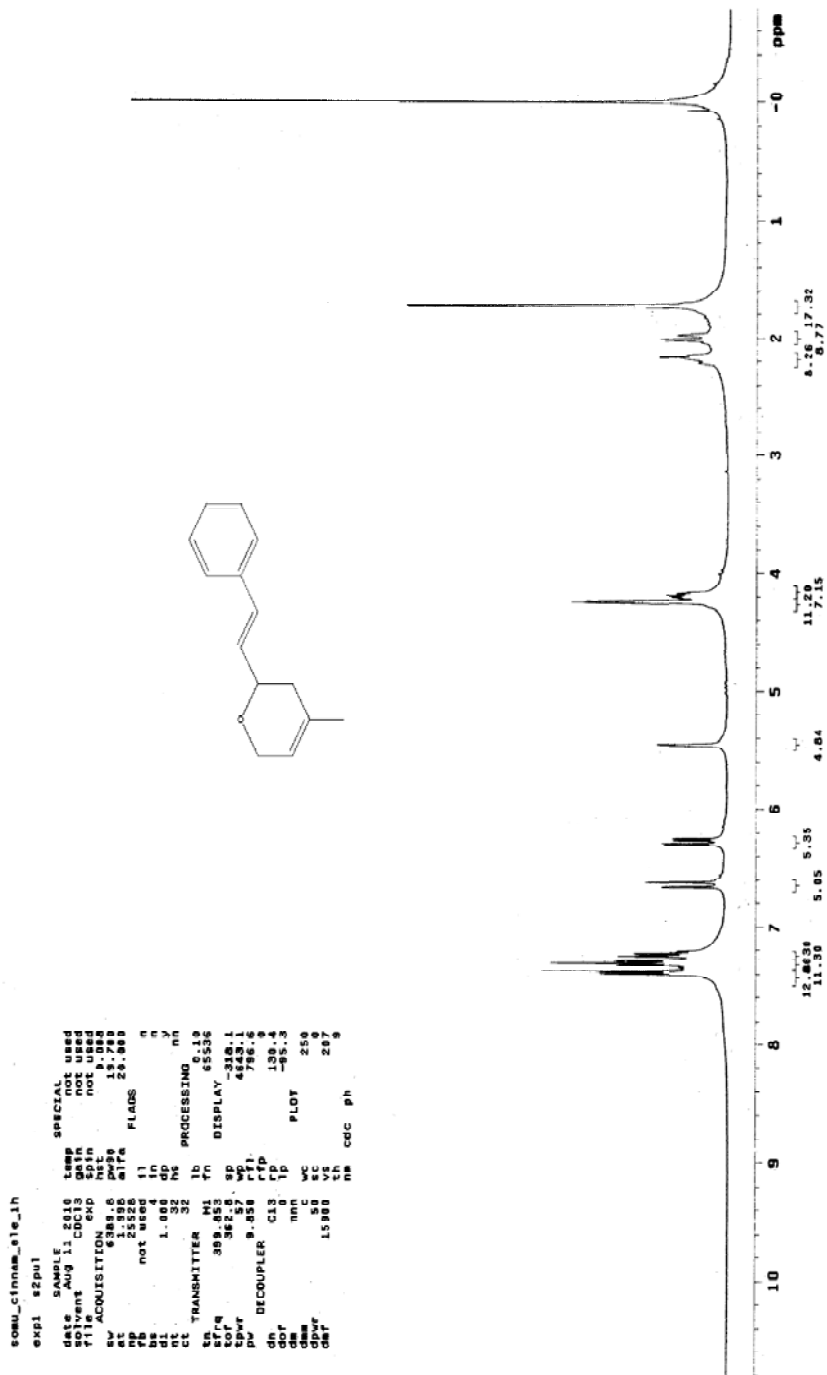

<sup>13</sup>C NMR of 6j

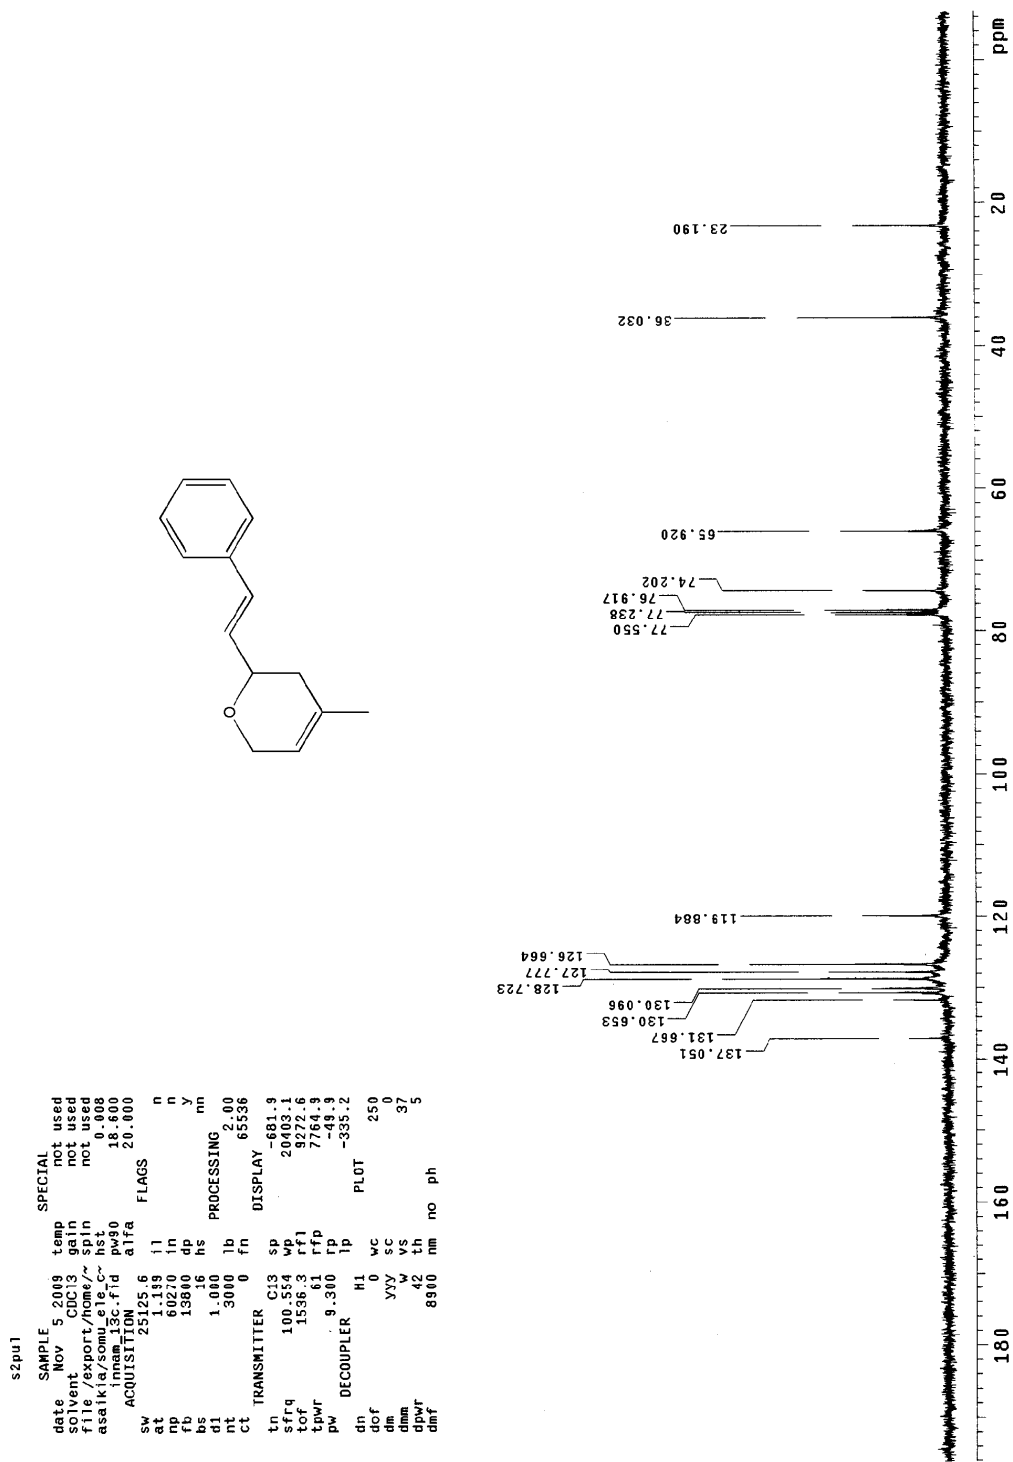

<sup>1</sup>H NMR of 6k

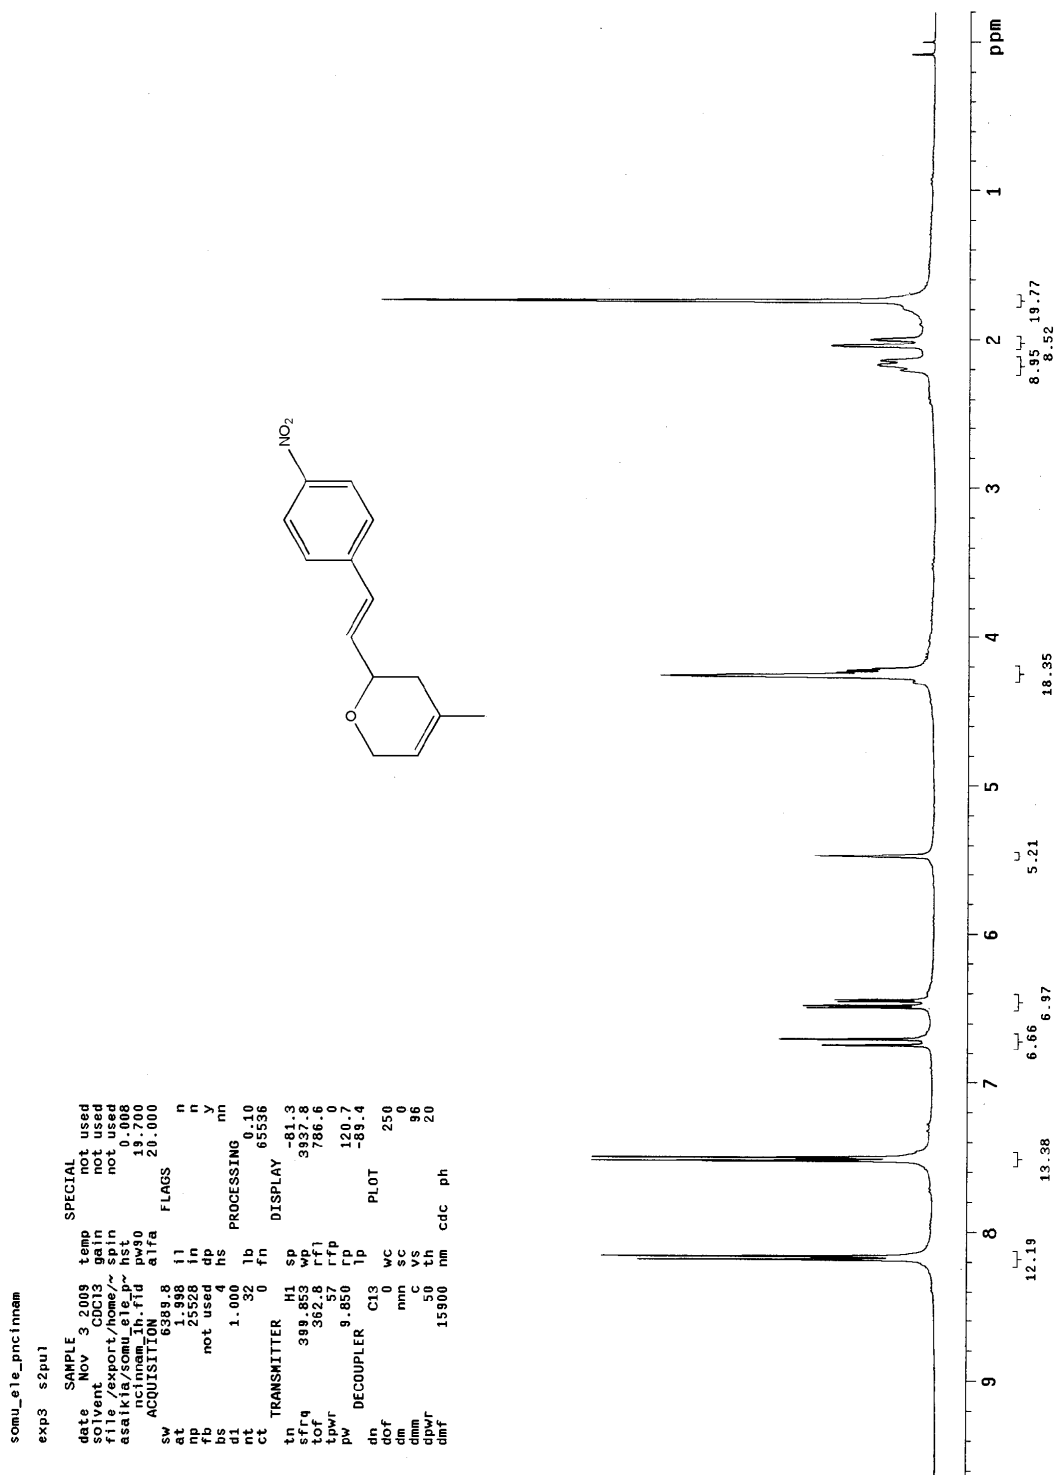

<sup>13</sup>C NMR of **6k**

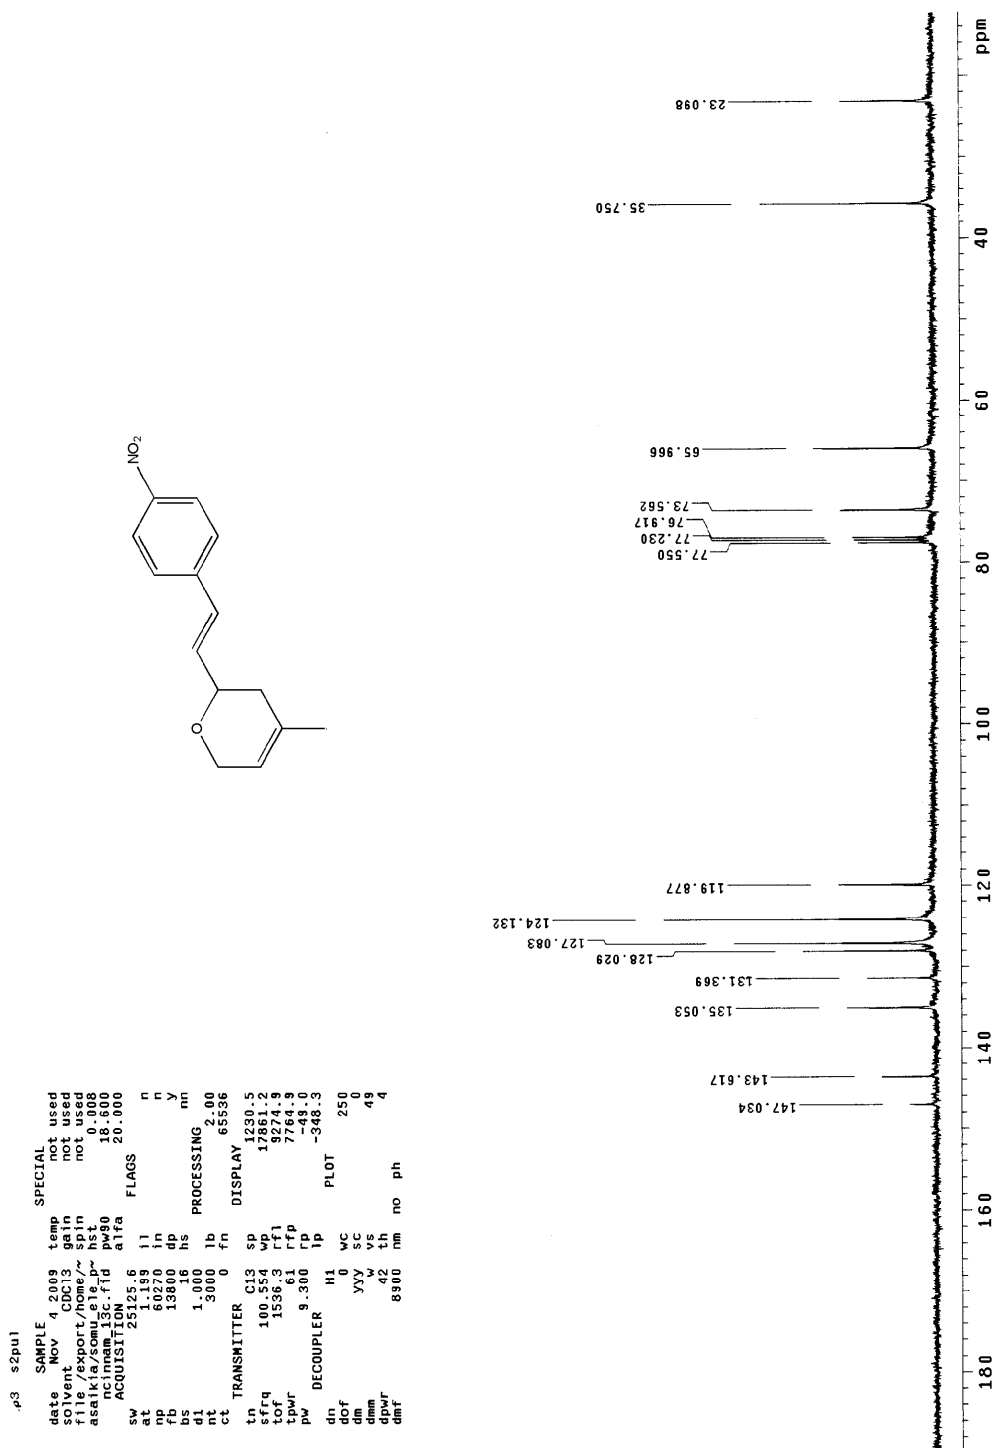

<sup>1</sup>H NMR of **6l**

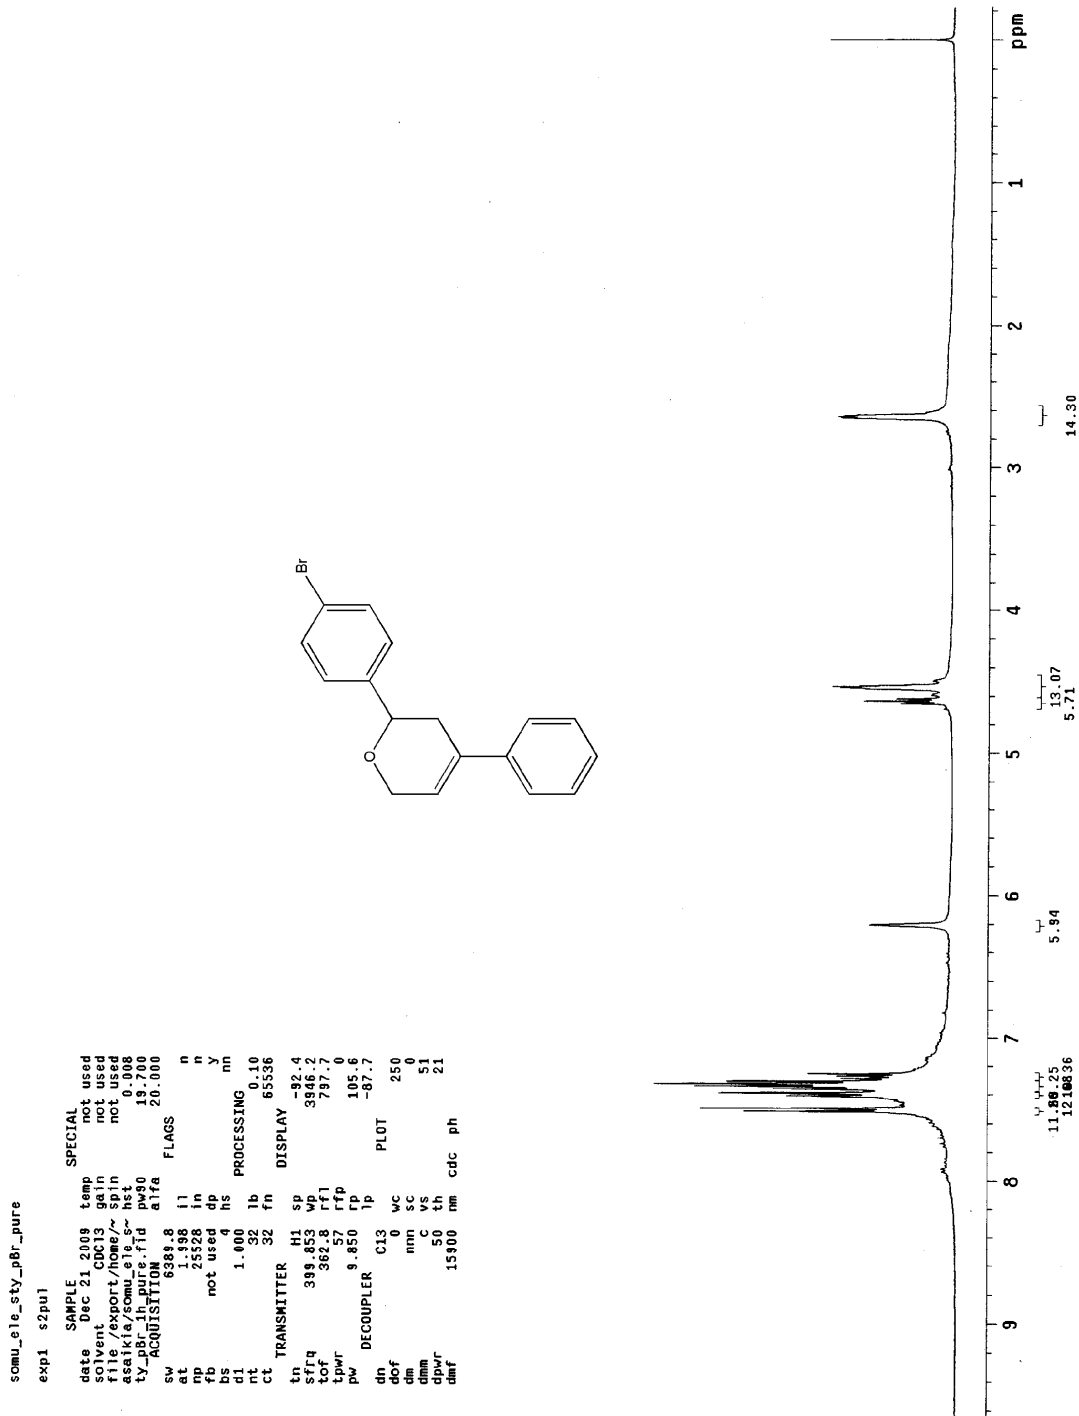

$^{13}\text{C}$  NMR of **6l**

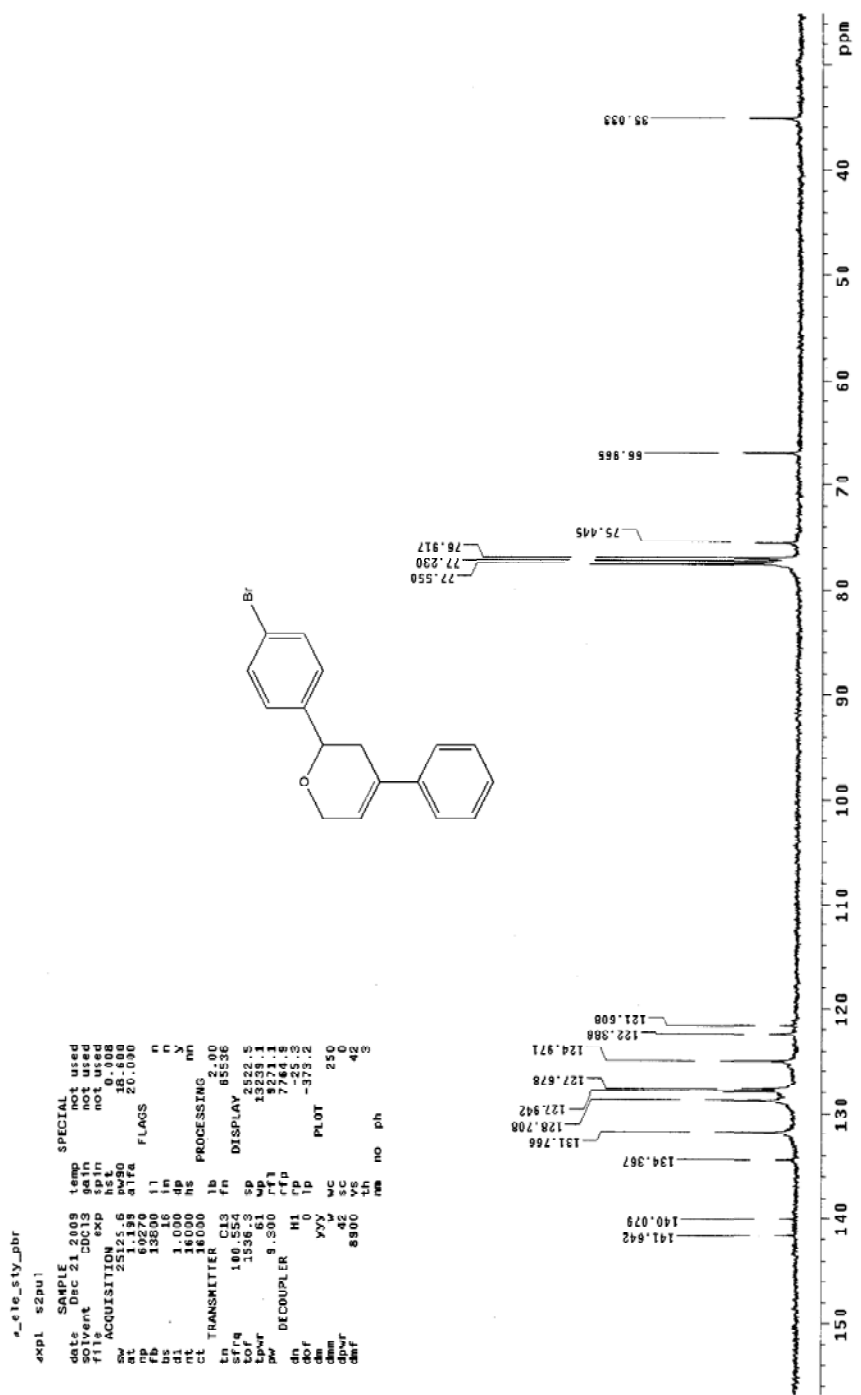

<sup>1</sup>H NMR of 6m

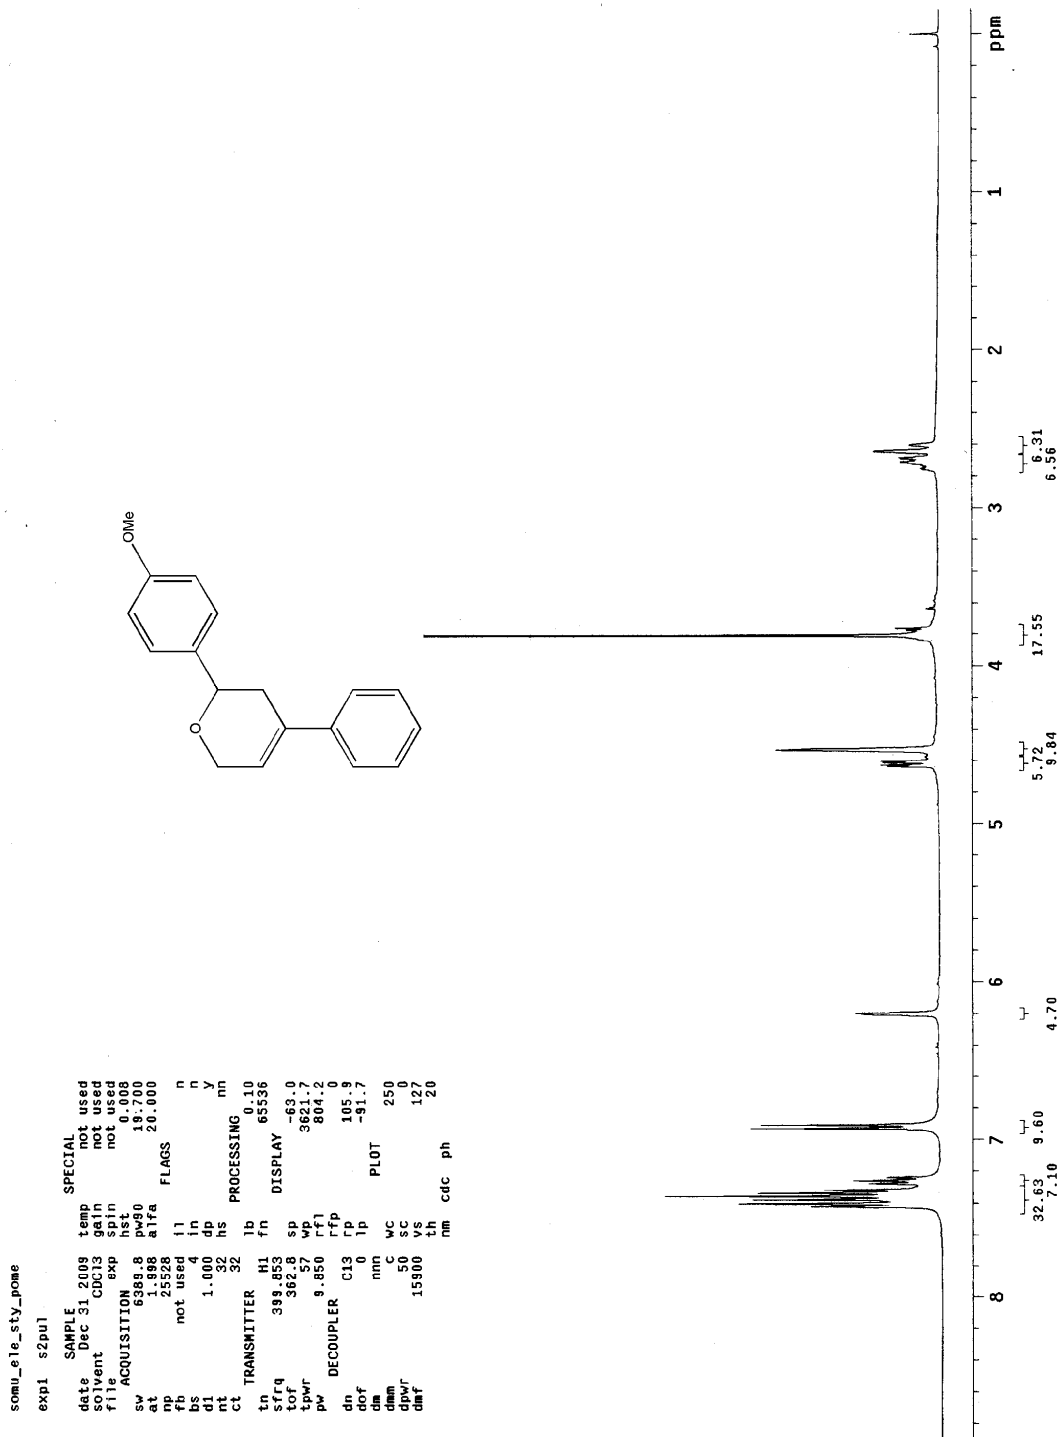



<sup>13</sup>C NMR of **6m**

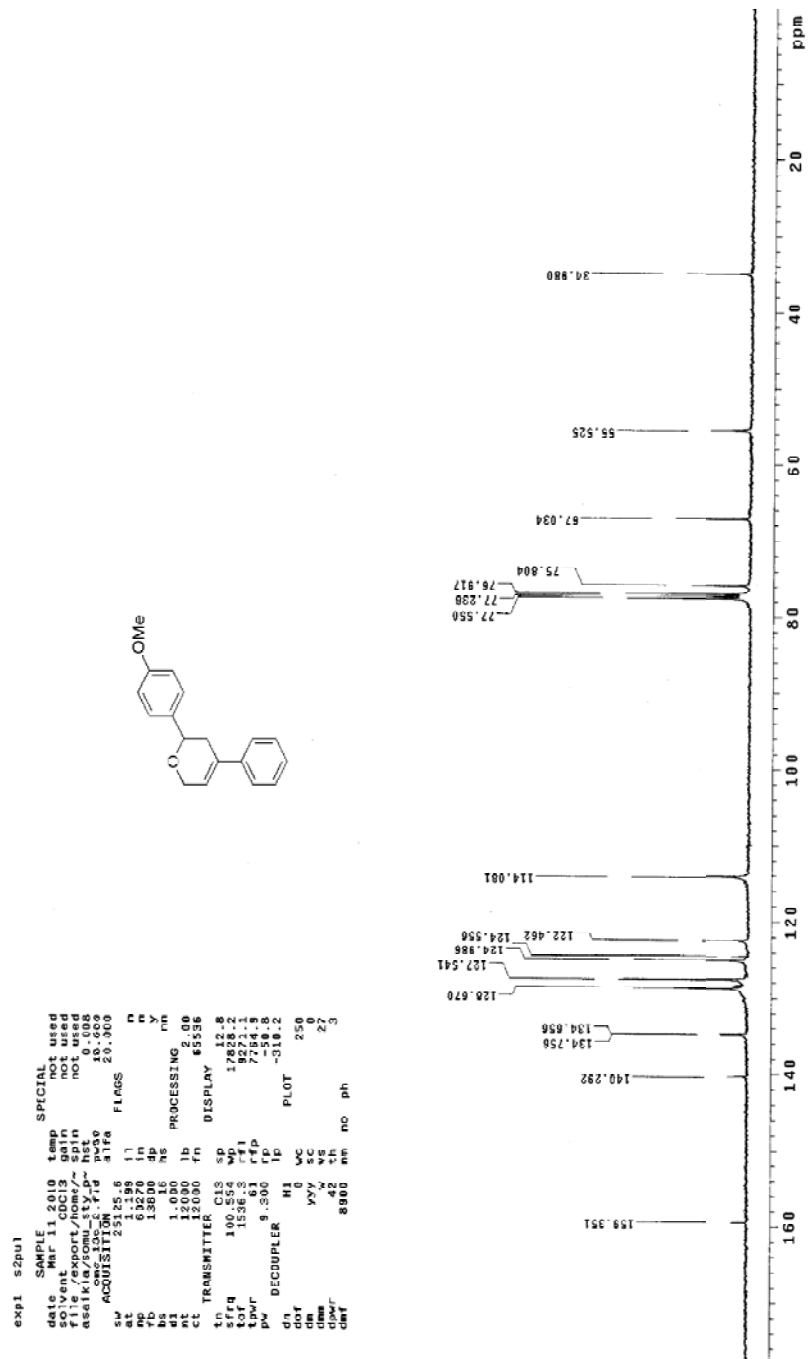

<sup>1</sup>H NMR of 6n & 7n

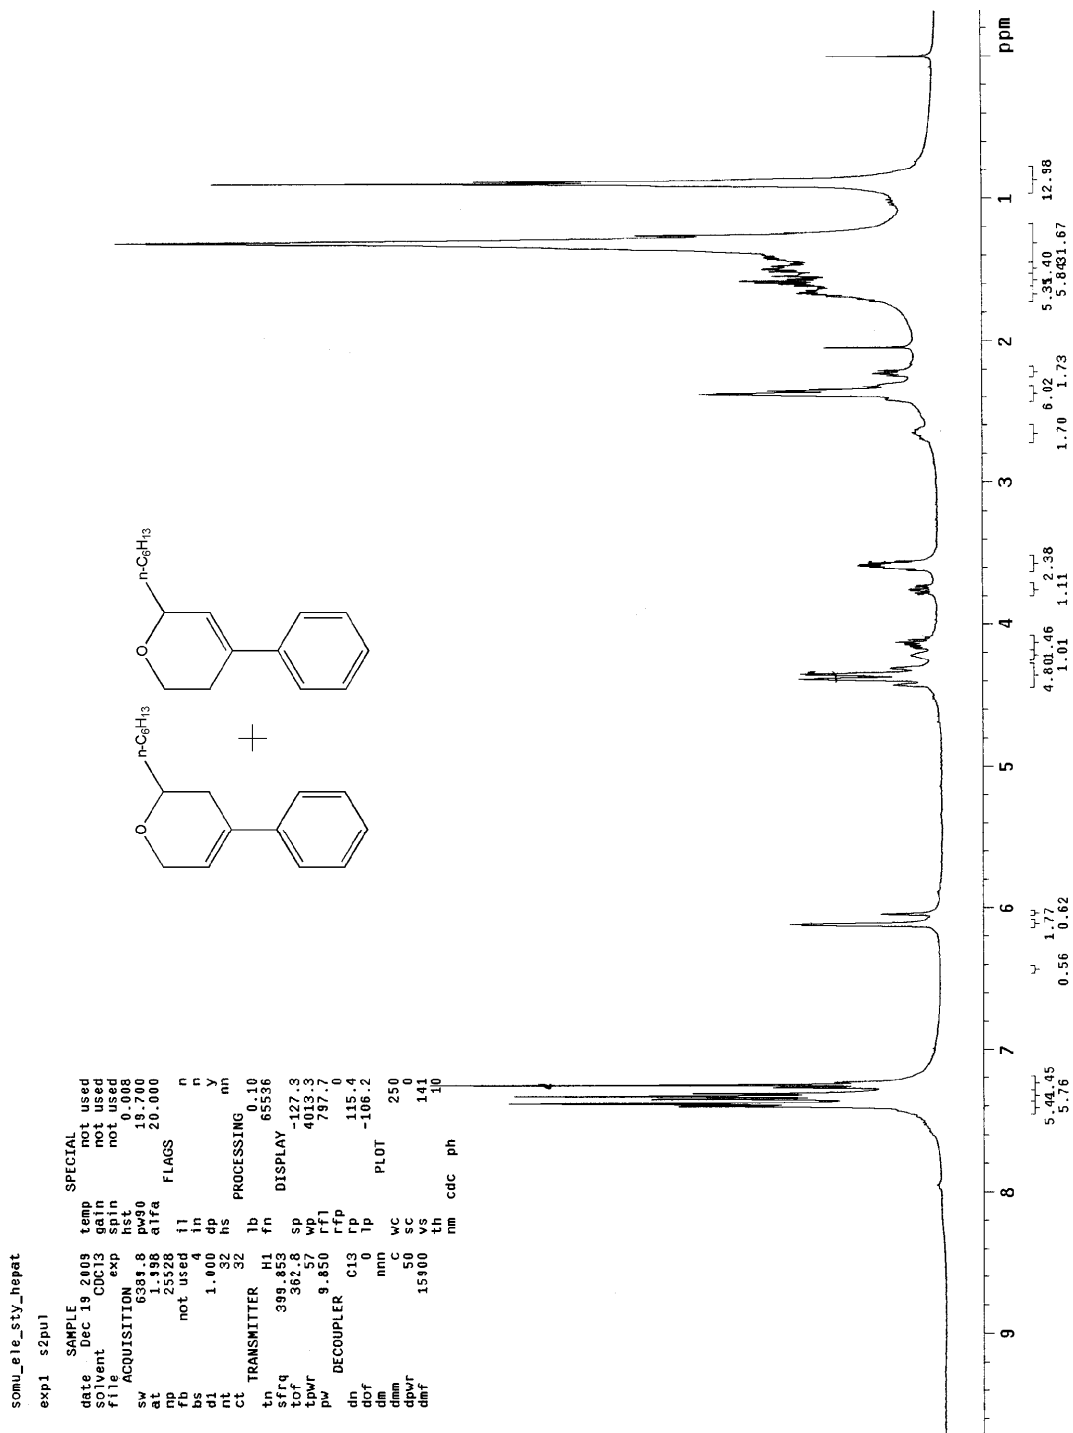

<sup>13</sup>C NMR of 6n & 7n

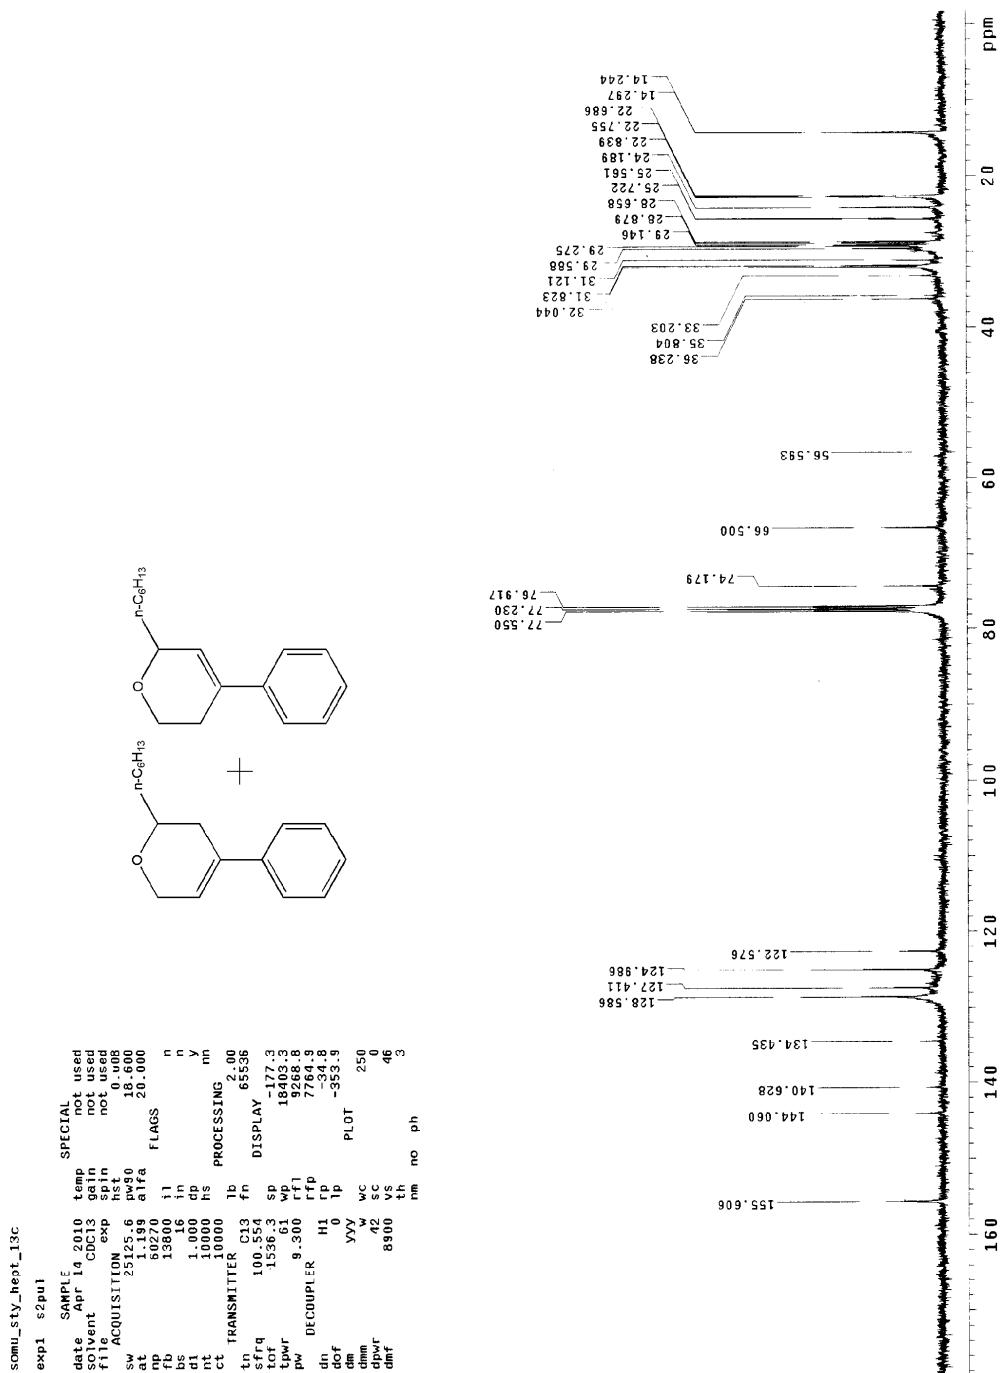

<sup>1</sup>H NMR of **60**

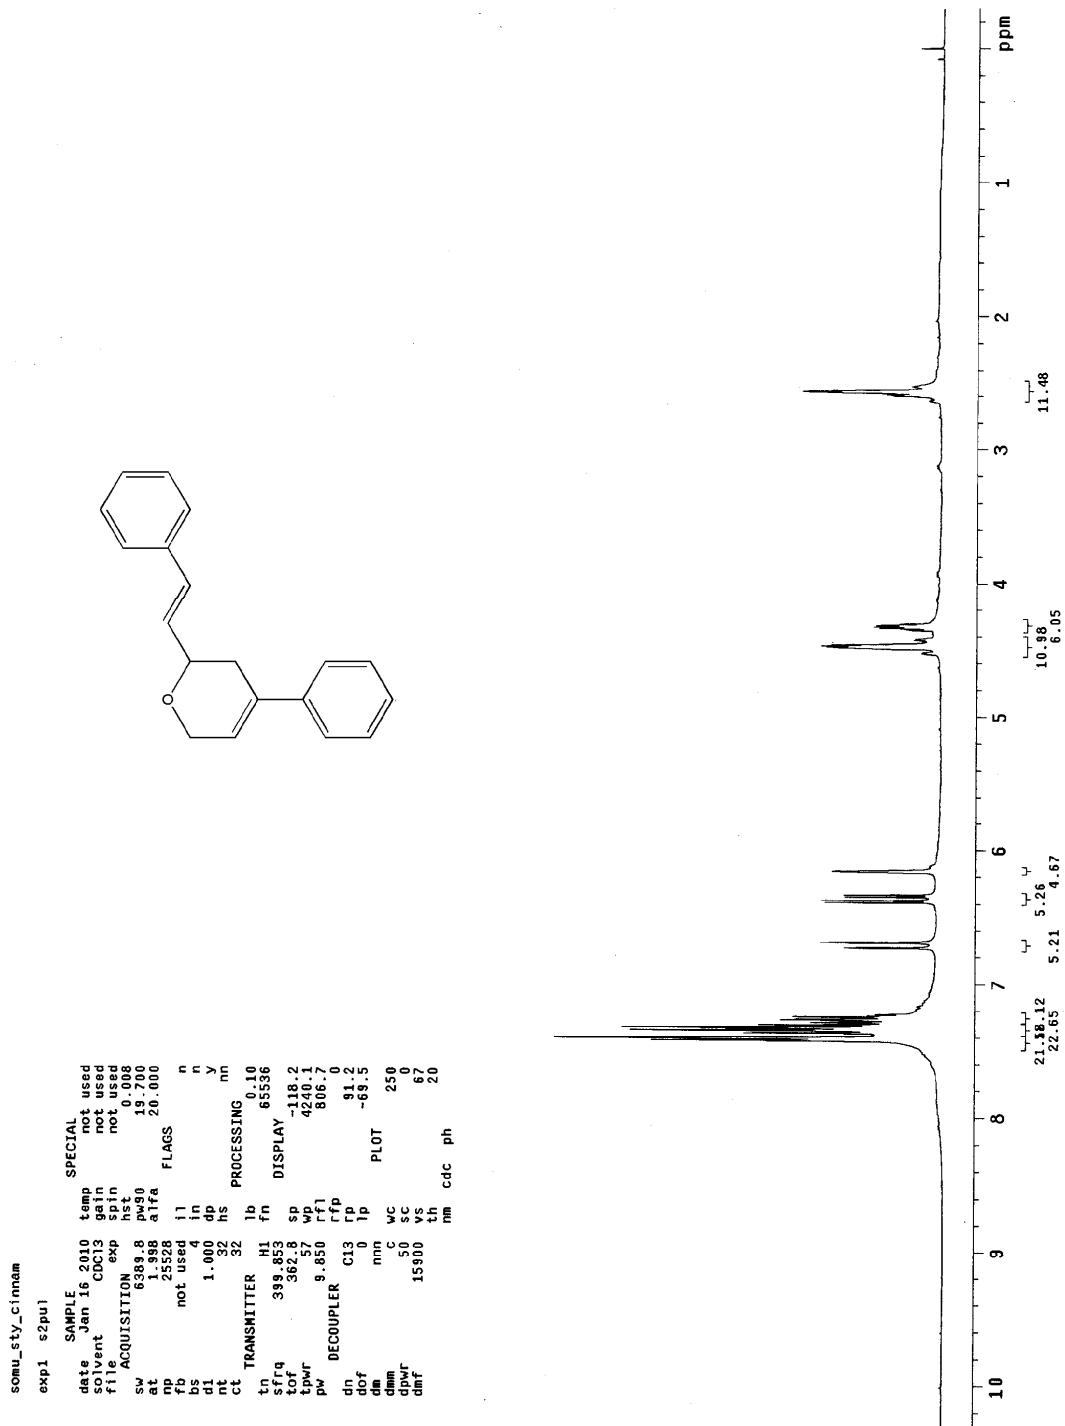

<sup>13</sup>C NMR of 60

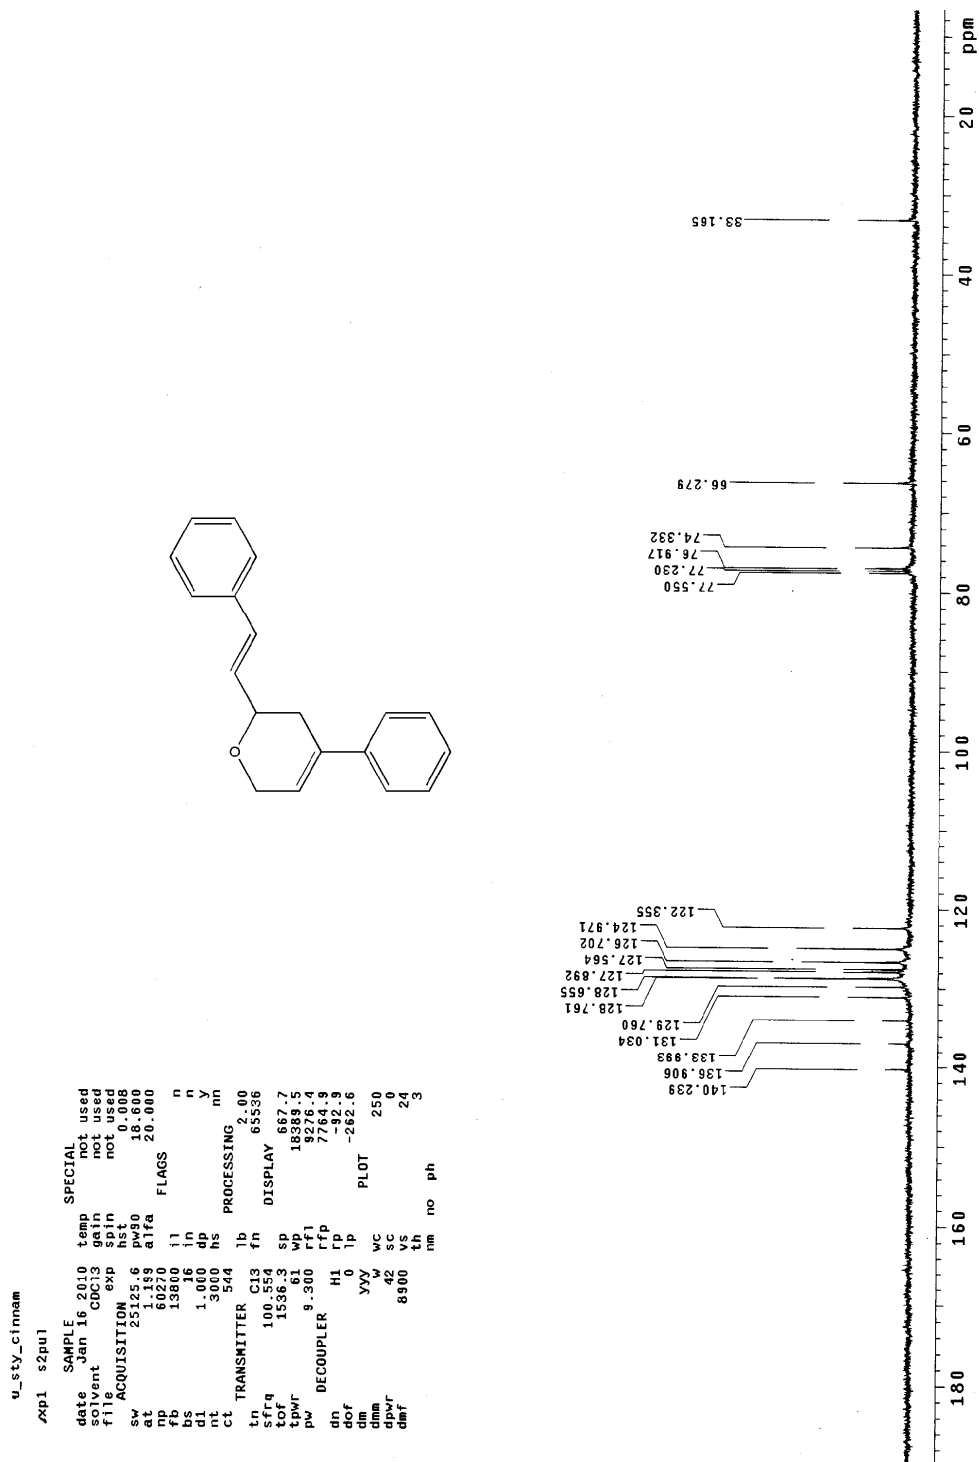

# <sup>1</sup>H NMR of **8p**

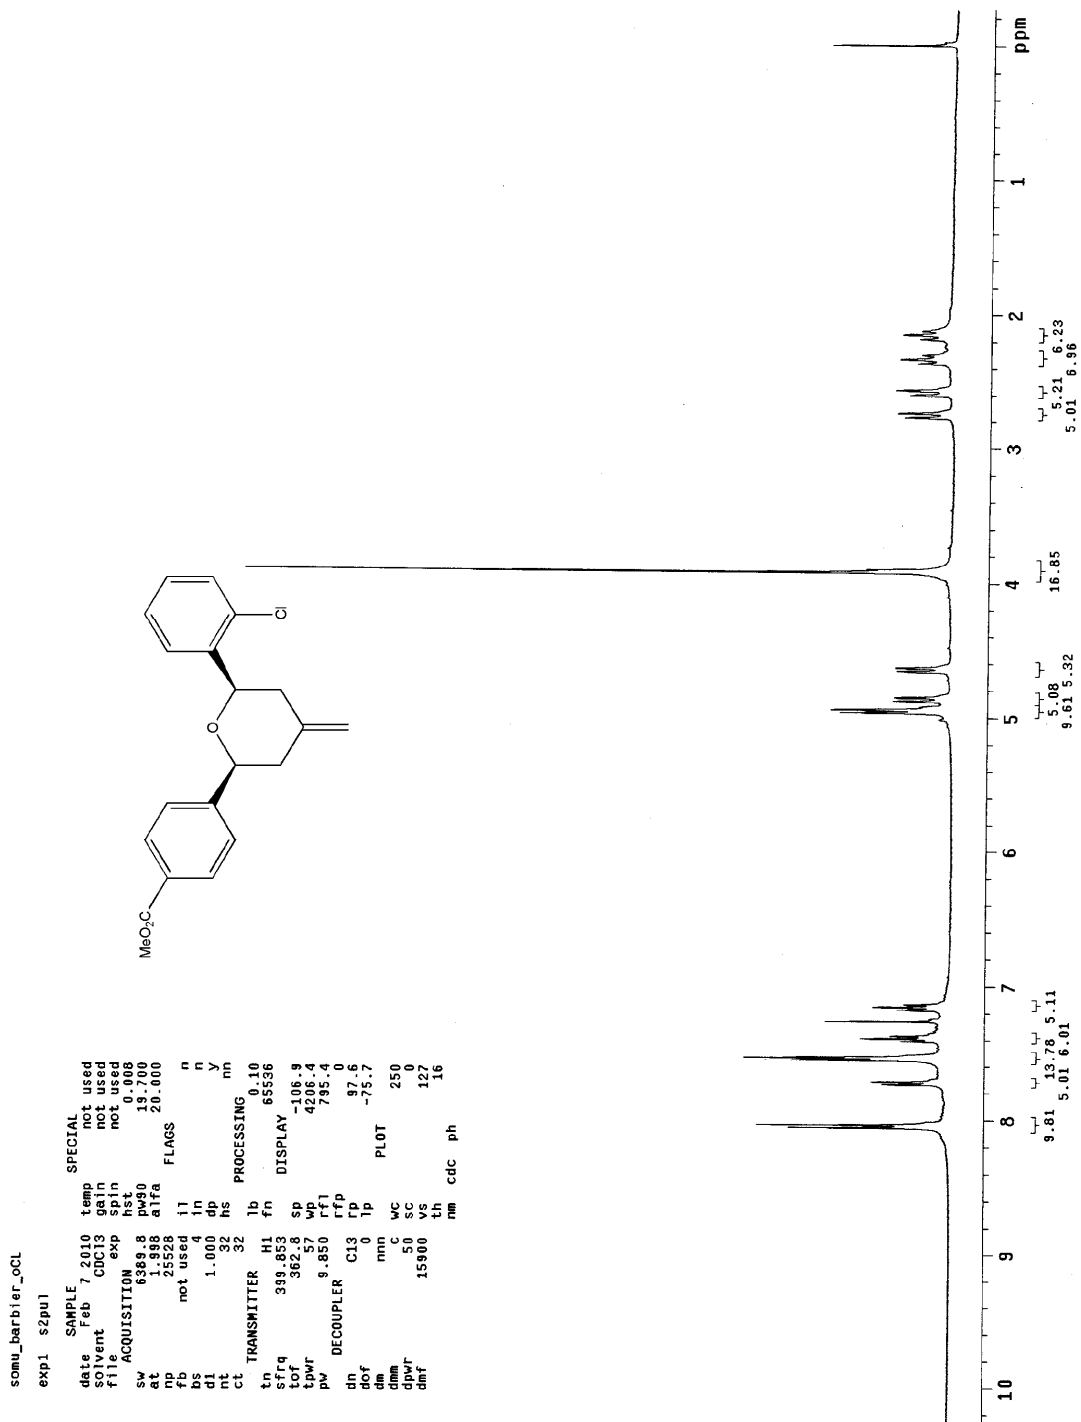

<sup>13</sup>C NMR of **8p**

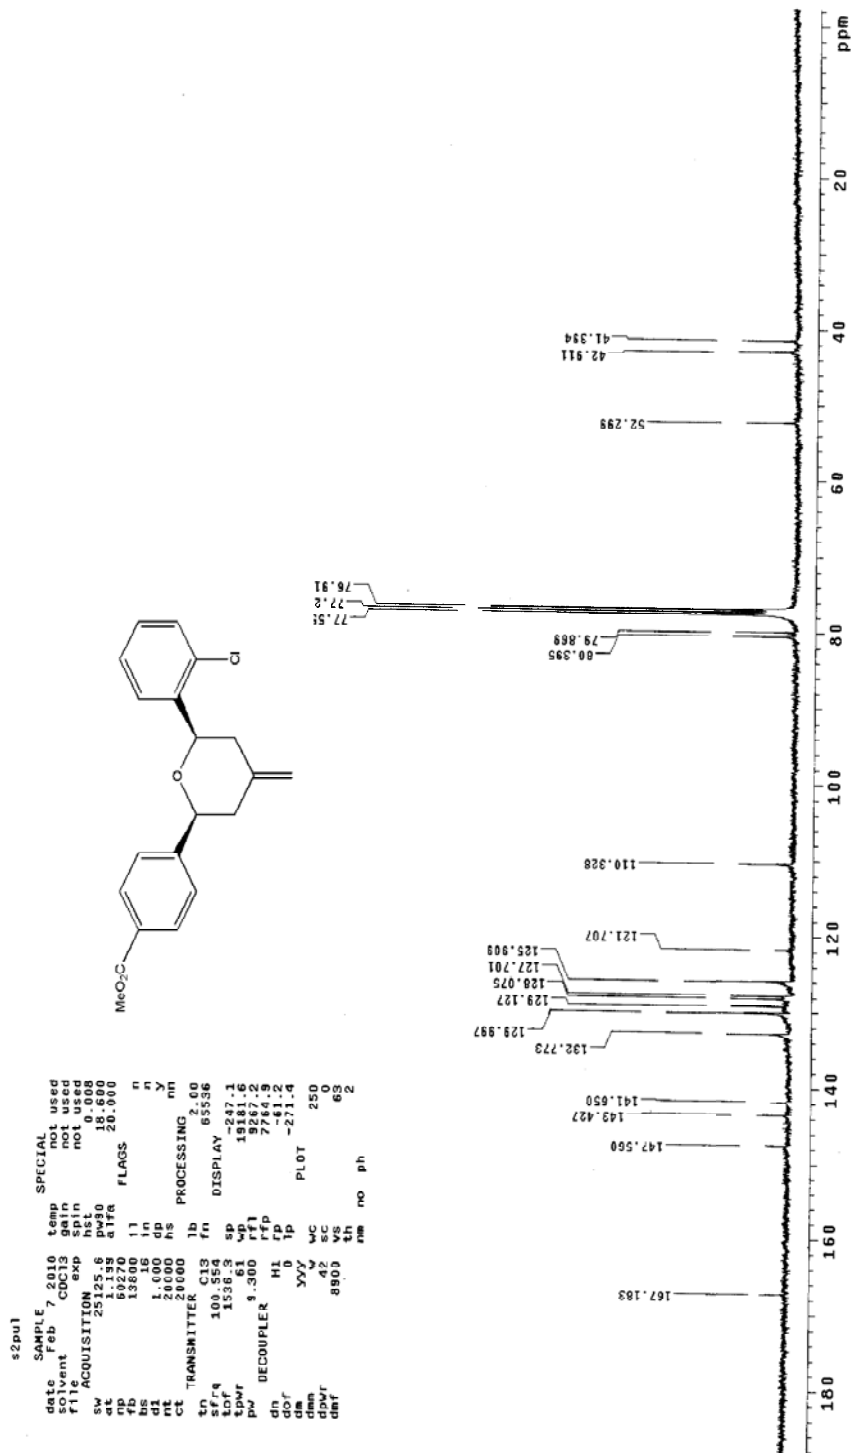

# <sup>1</sup>H NMR of 8q

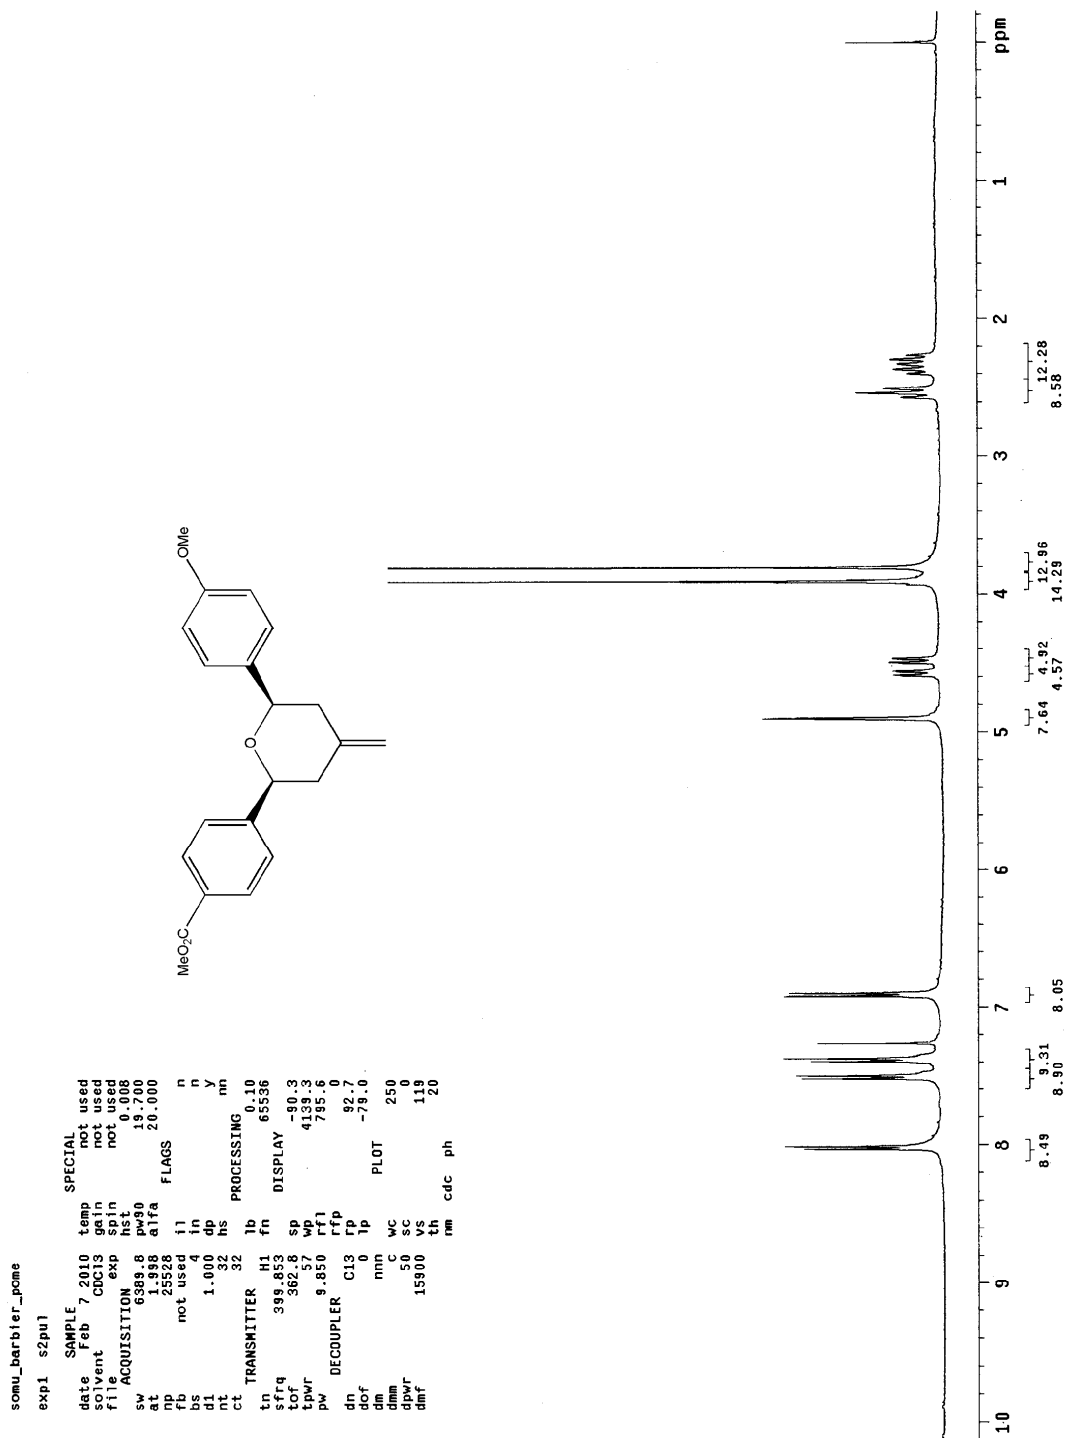



<sup>13</sup>C NMR of **8q**

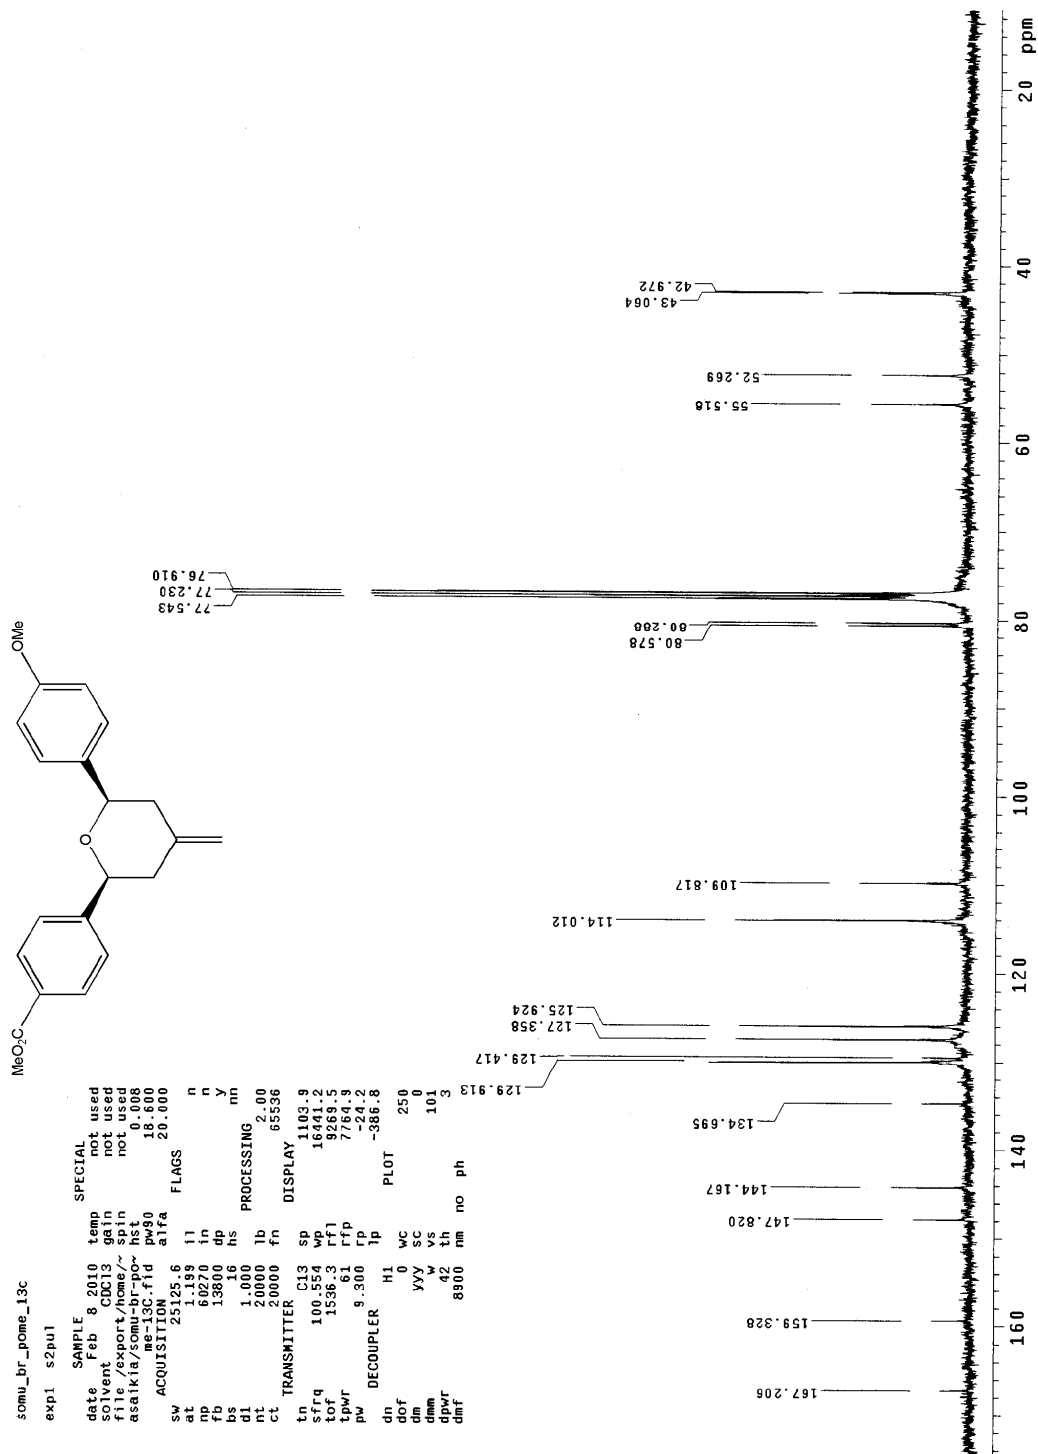

# $^1\text{H}$ NMR of 8r

```
tomu_1e_pcozme-benz  
expt  szdu1  
-----  
date      5 2018      temp      not used  
solvent   Oct 13      gain      not used  
fl1       not used  
ACQUISITION  SPP      hit      1.888  
sw        6389.8      pvs0     19.760  
nt        21528      n1       26.563  
wb        not used   fl       FLABS  
bt        1.004      in       n  
nt        1.38       nt       n  
ct        32        n1  
-----  
IN TRANSMITTER  HI  lb  9.18  
rfq           398.653  rn  DISPLAY  6538  
tof           312.0   sp  
tpr           8.57   wf  422.8  
pw            8.859  rfp  793.8  
dc           c13  fp  151.7  
dof           nnc  lp  -82.2  
dm           nnc  c  258  
dpr           58   sc  48  
dbr           1500  th  42  
nm           nm   cdc  ph  12
```

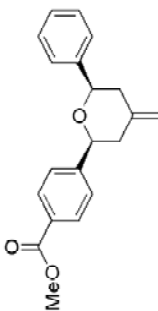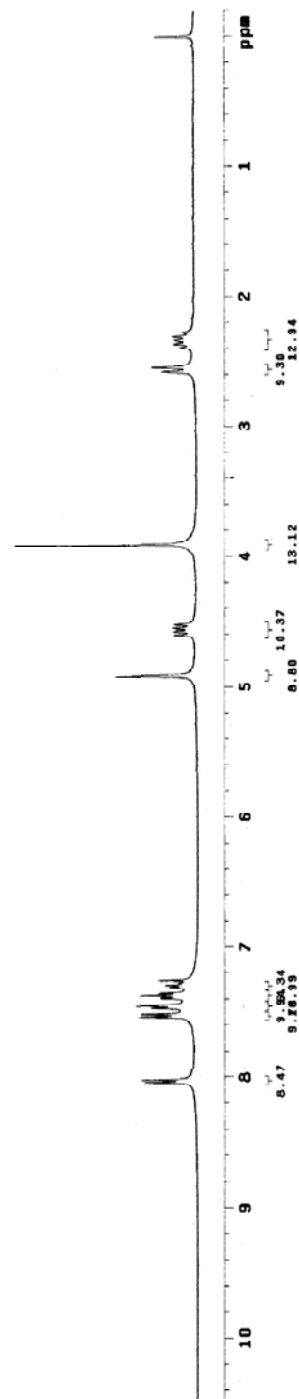

<sup>13</sup>C NMR of 8r

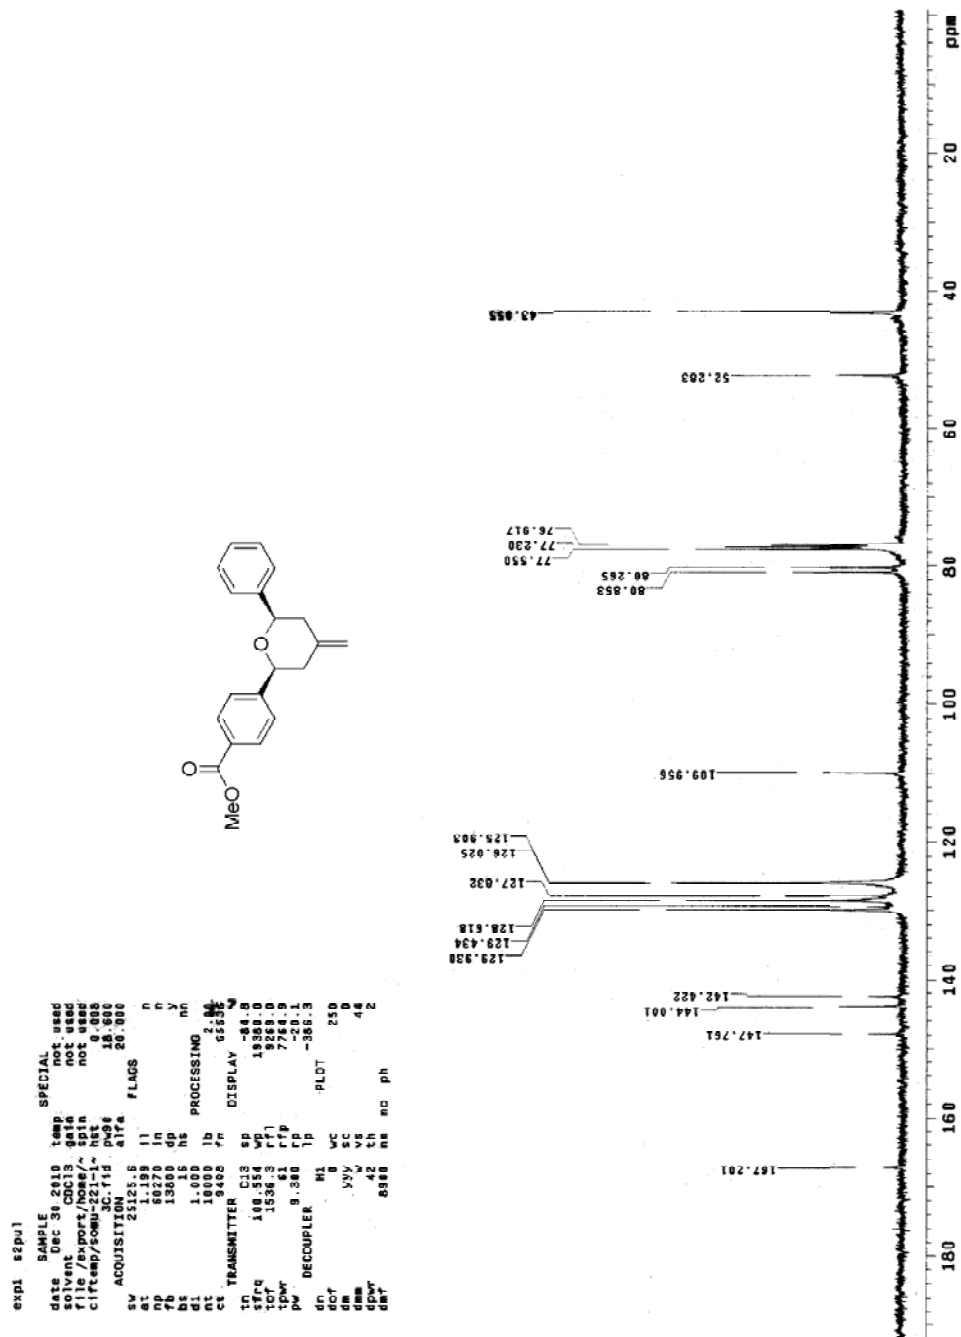

# $^1\text{H}$ NMR of 8s

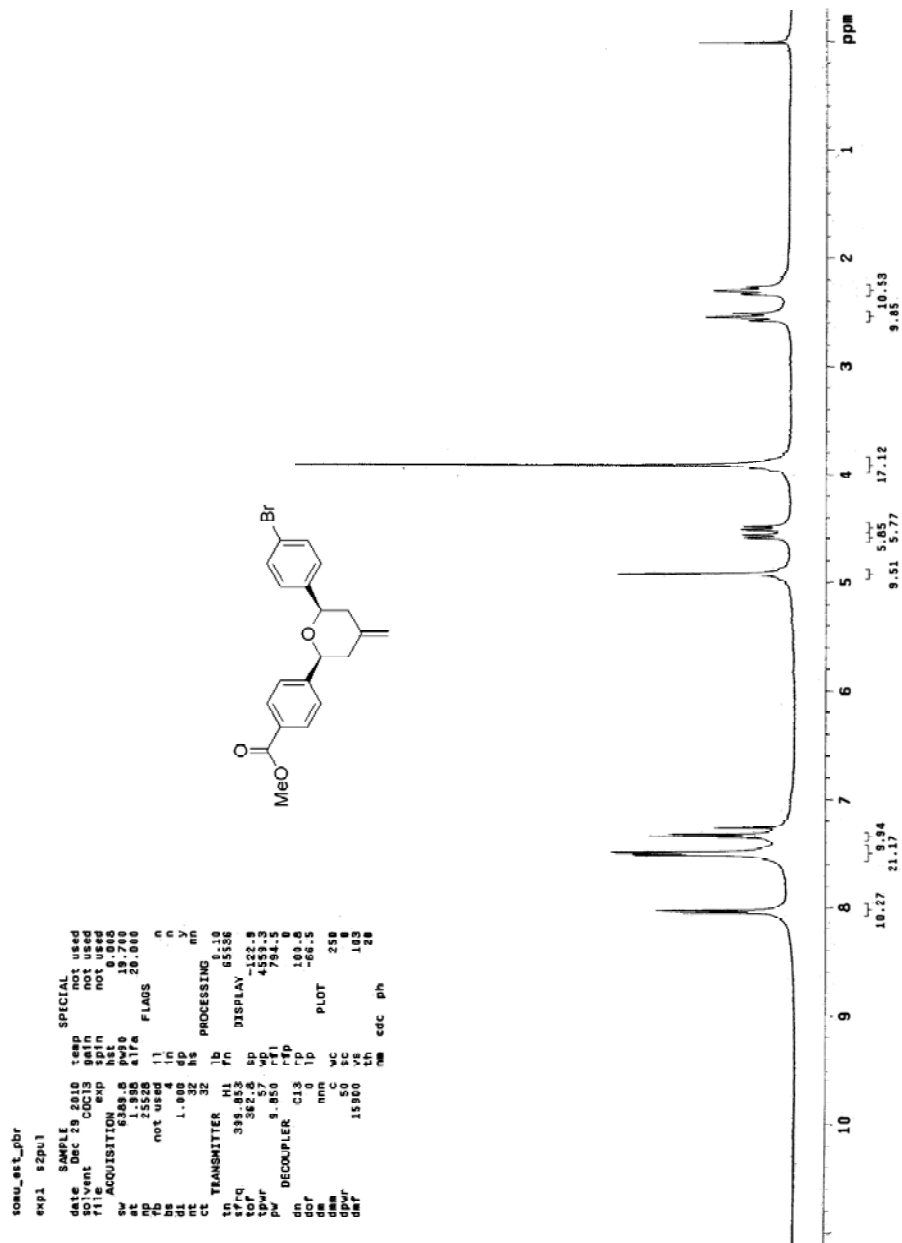

<sup>13</sup>C NMR of 8s

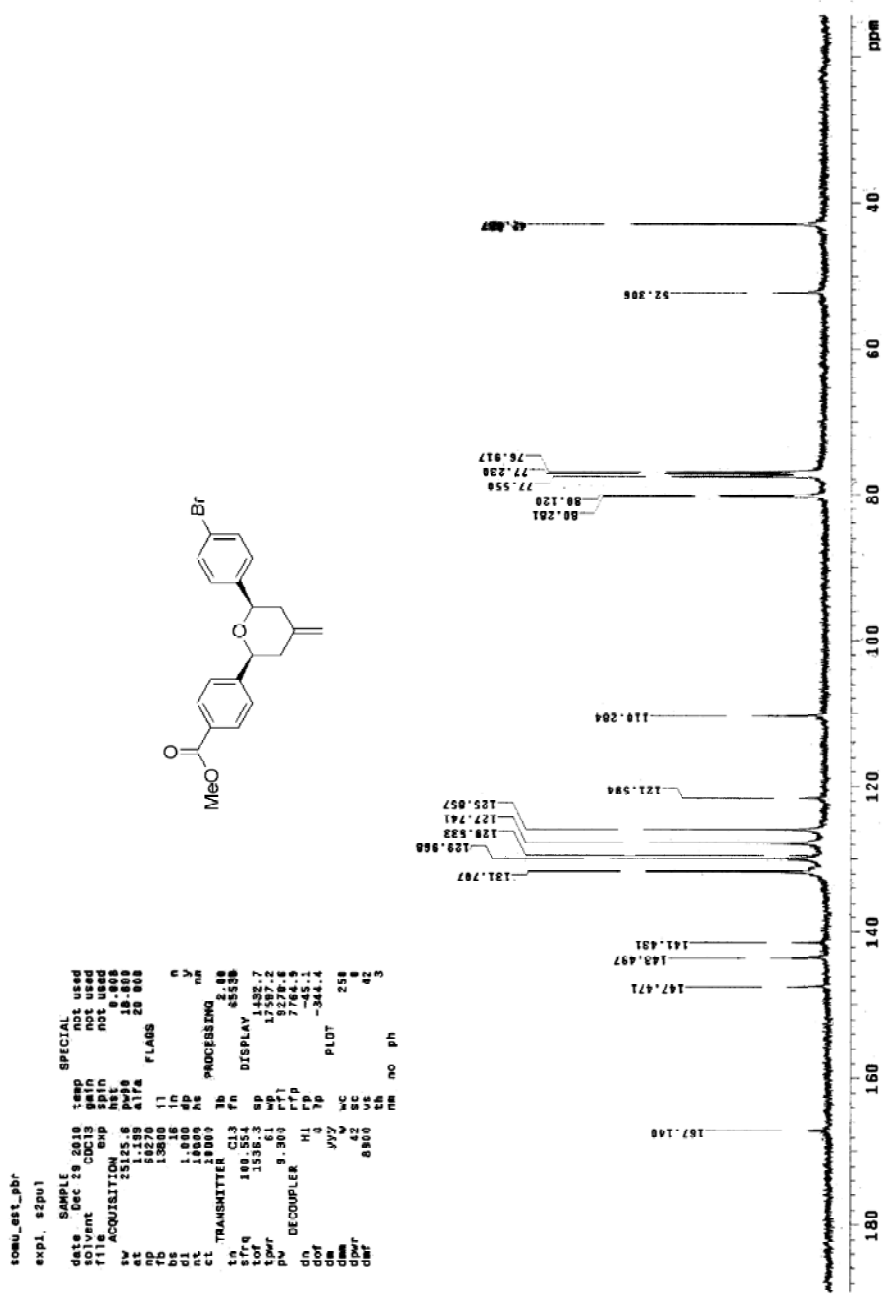

<sup>1</sup>H NMR of 8t

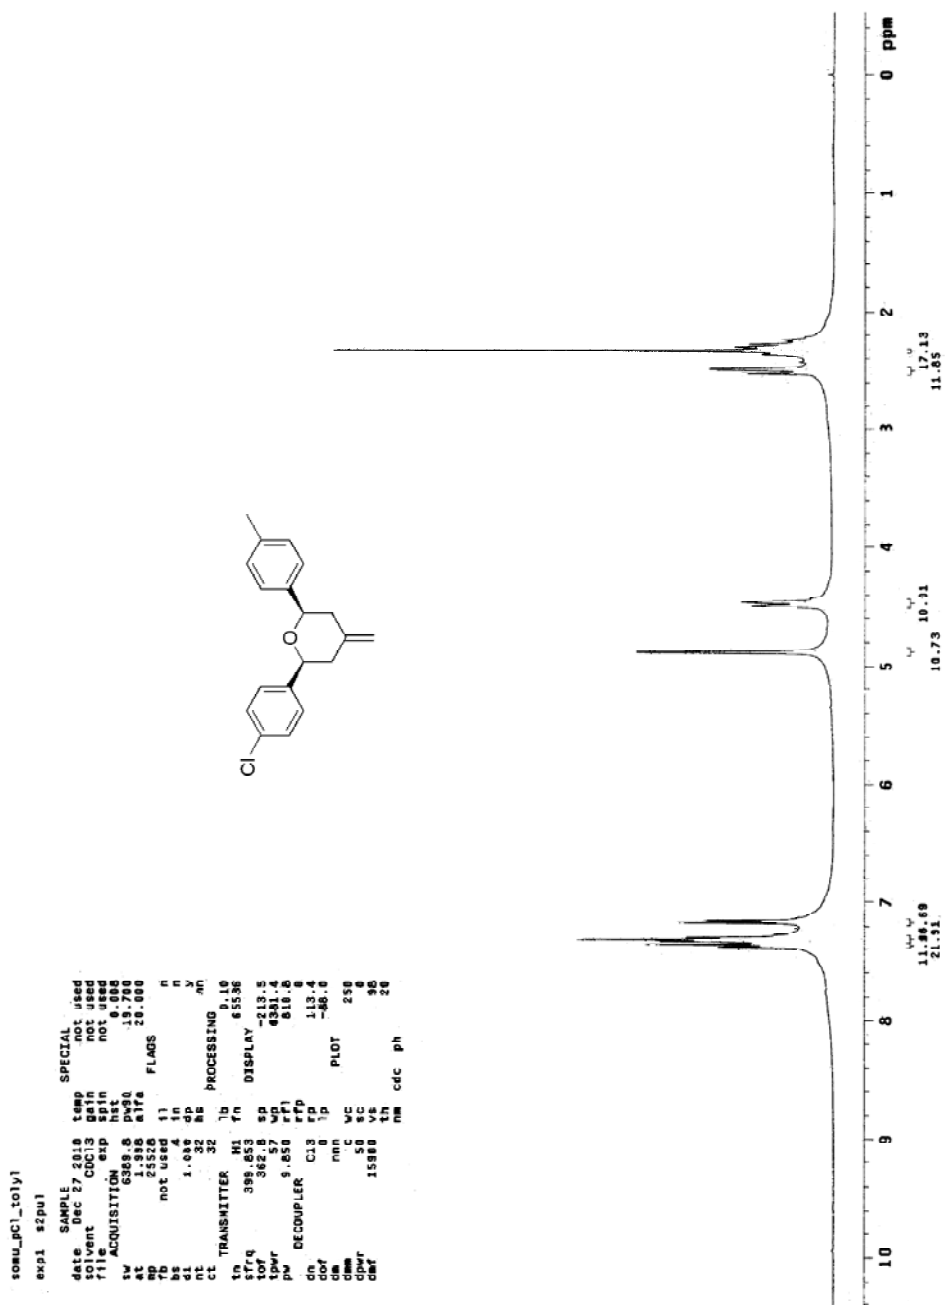

<sup>13</sup>C NMR of 8t

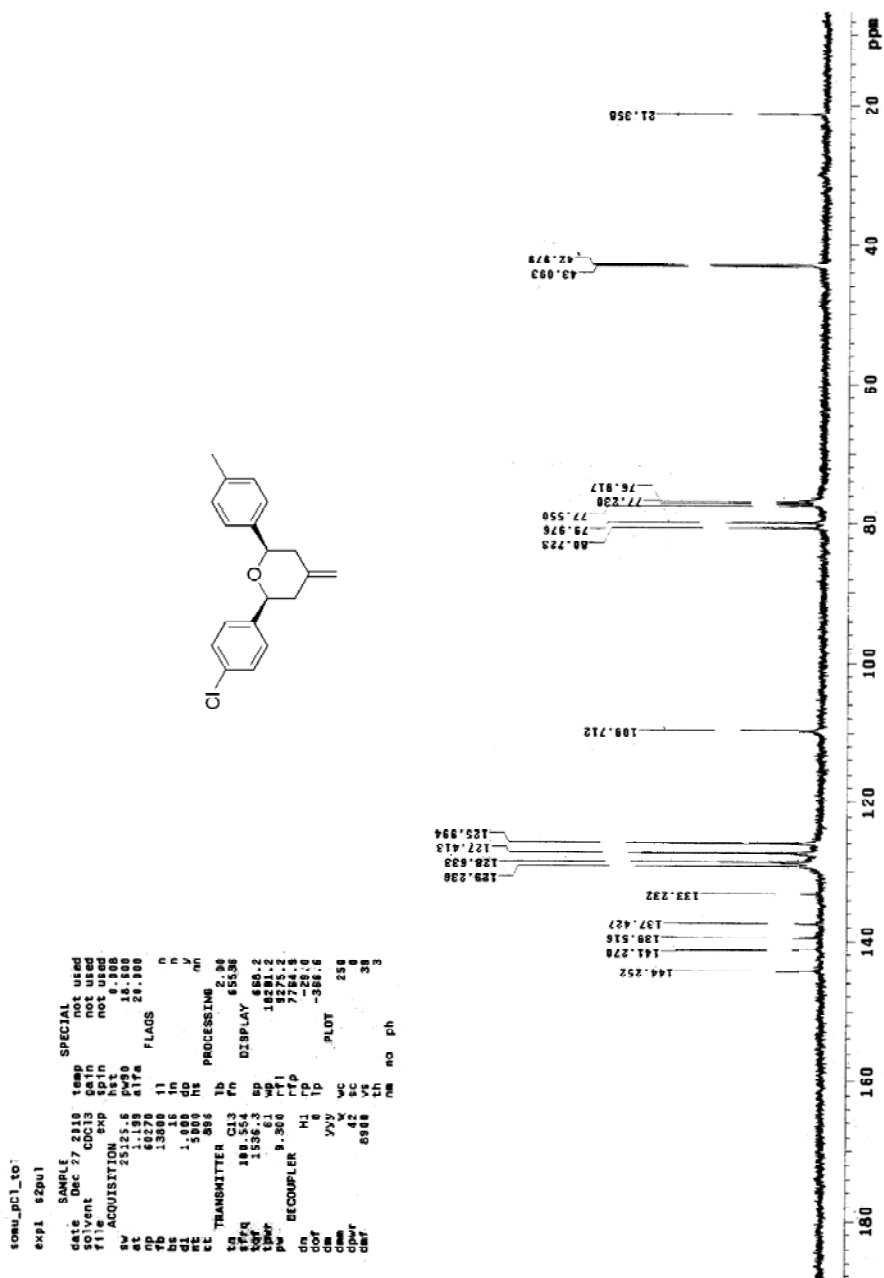





<sup>13</sup>C NMR of 8u

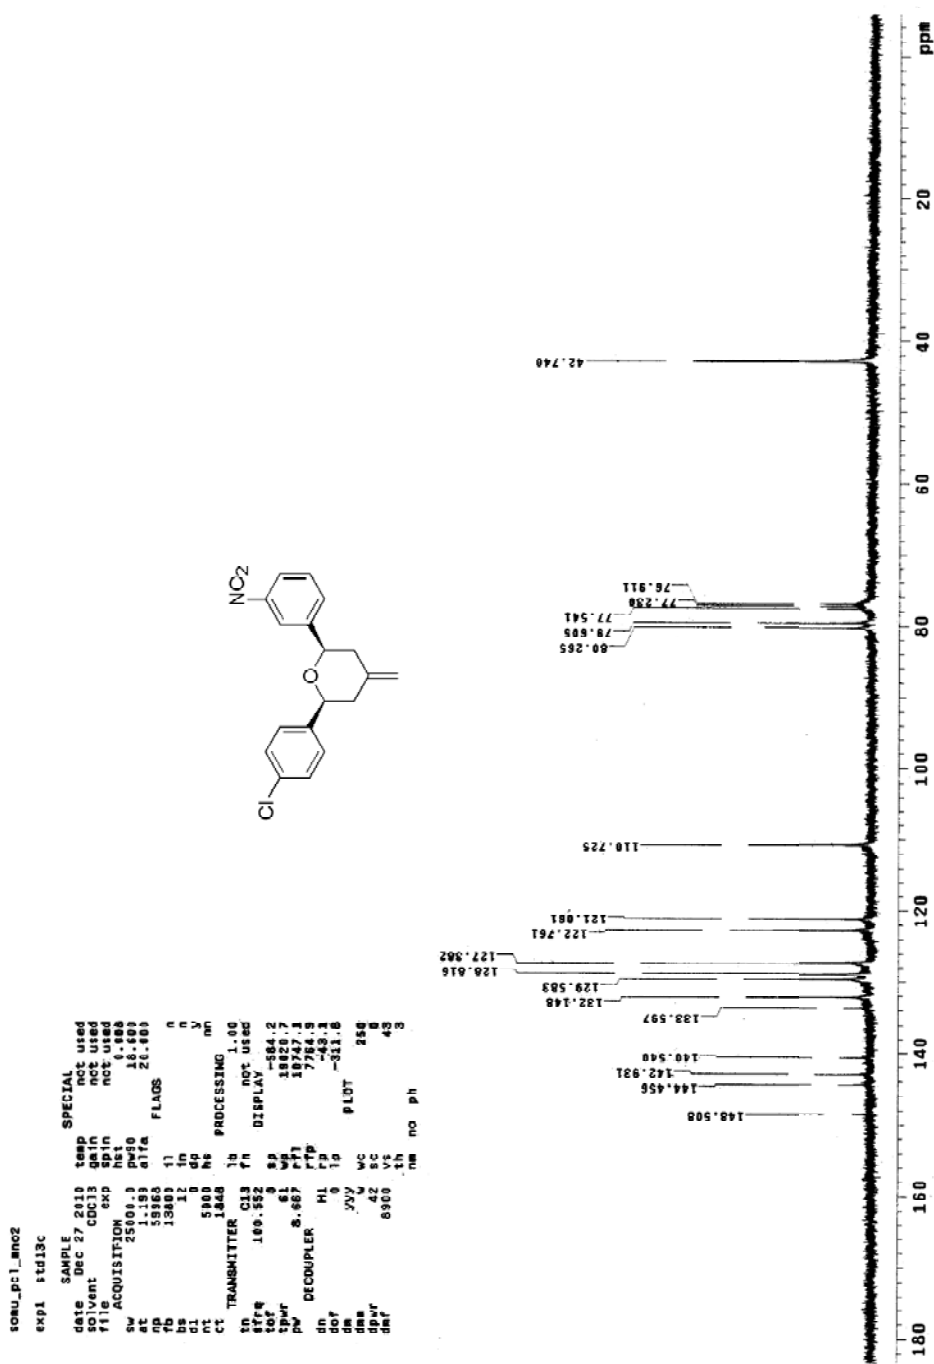

<sup>1</sup>H NMR of 6v

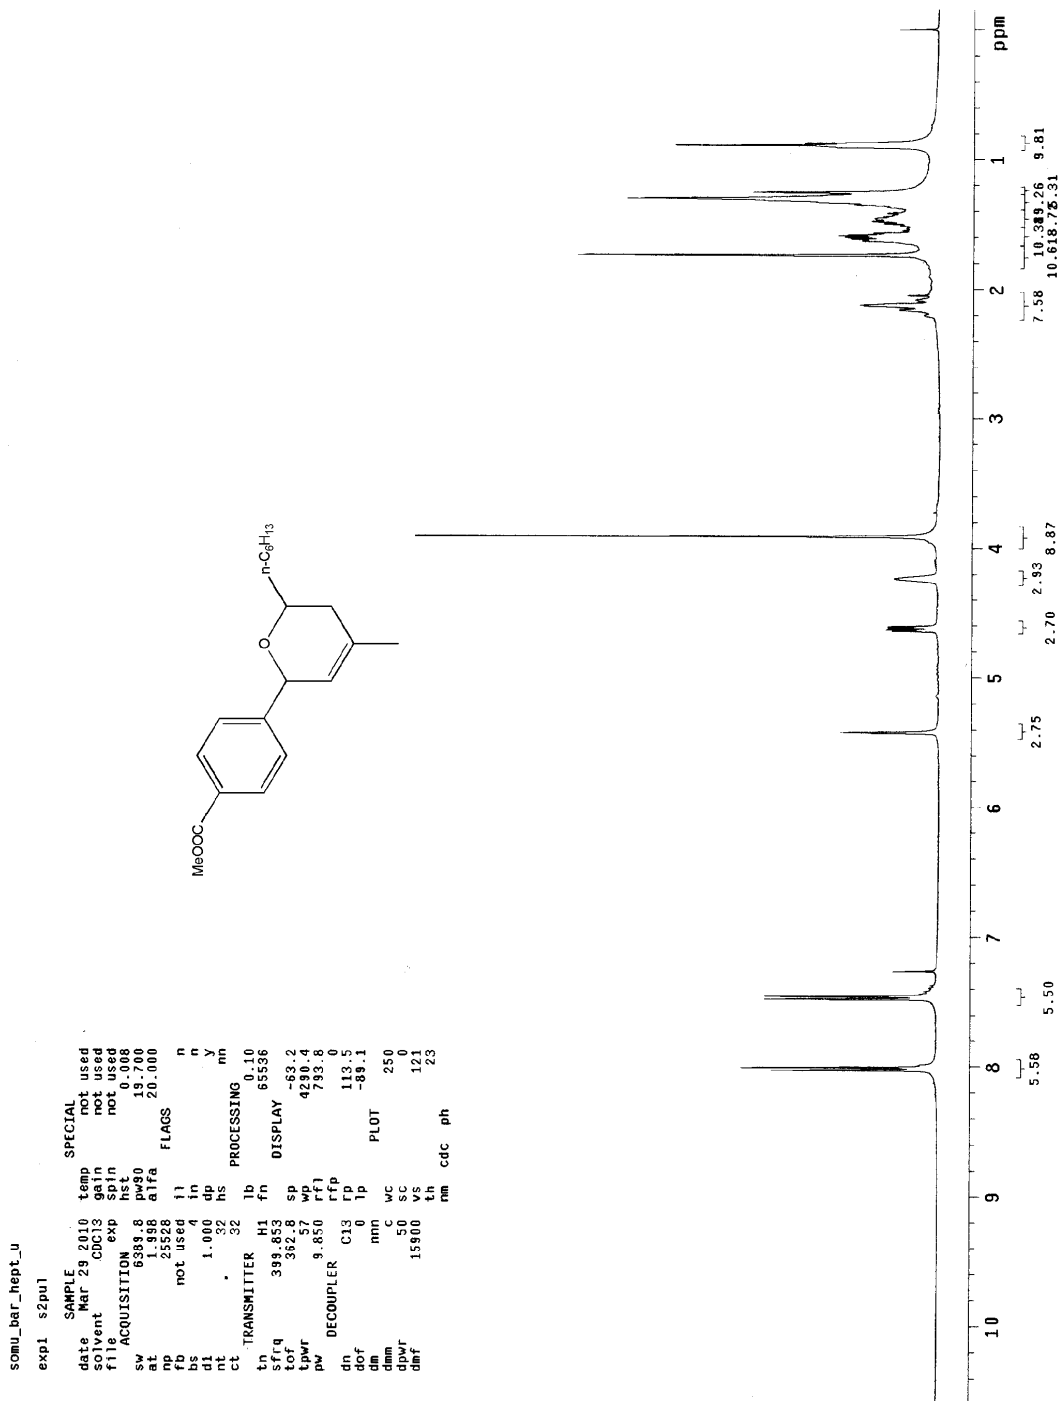

<sup>13</sup>C NMR of **6v**

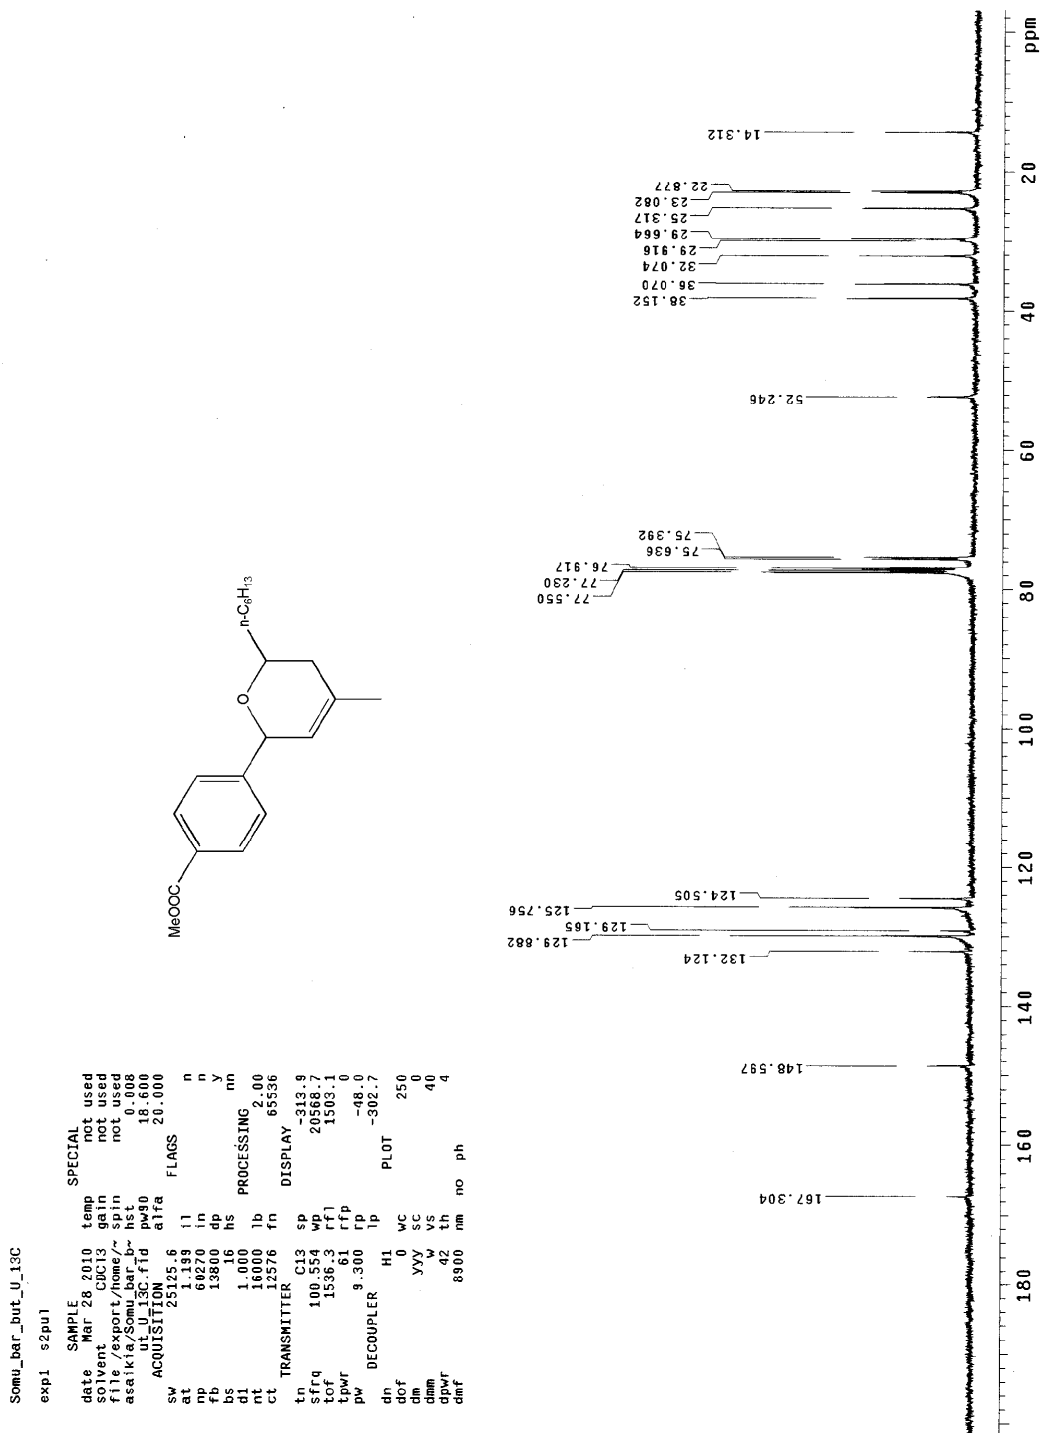

<sup>1</sup>H NMR of **8v**

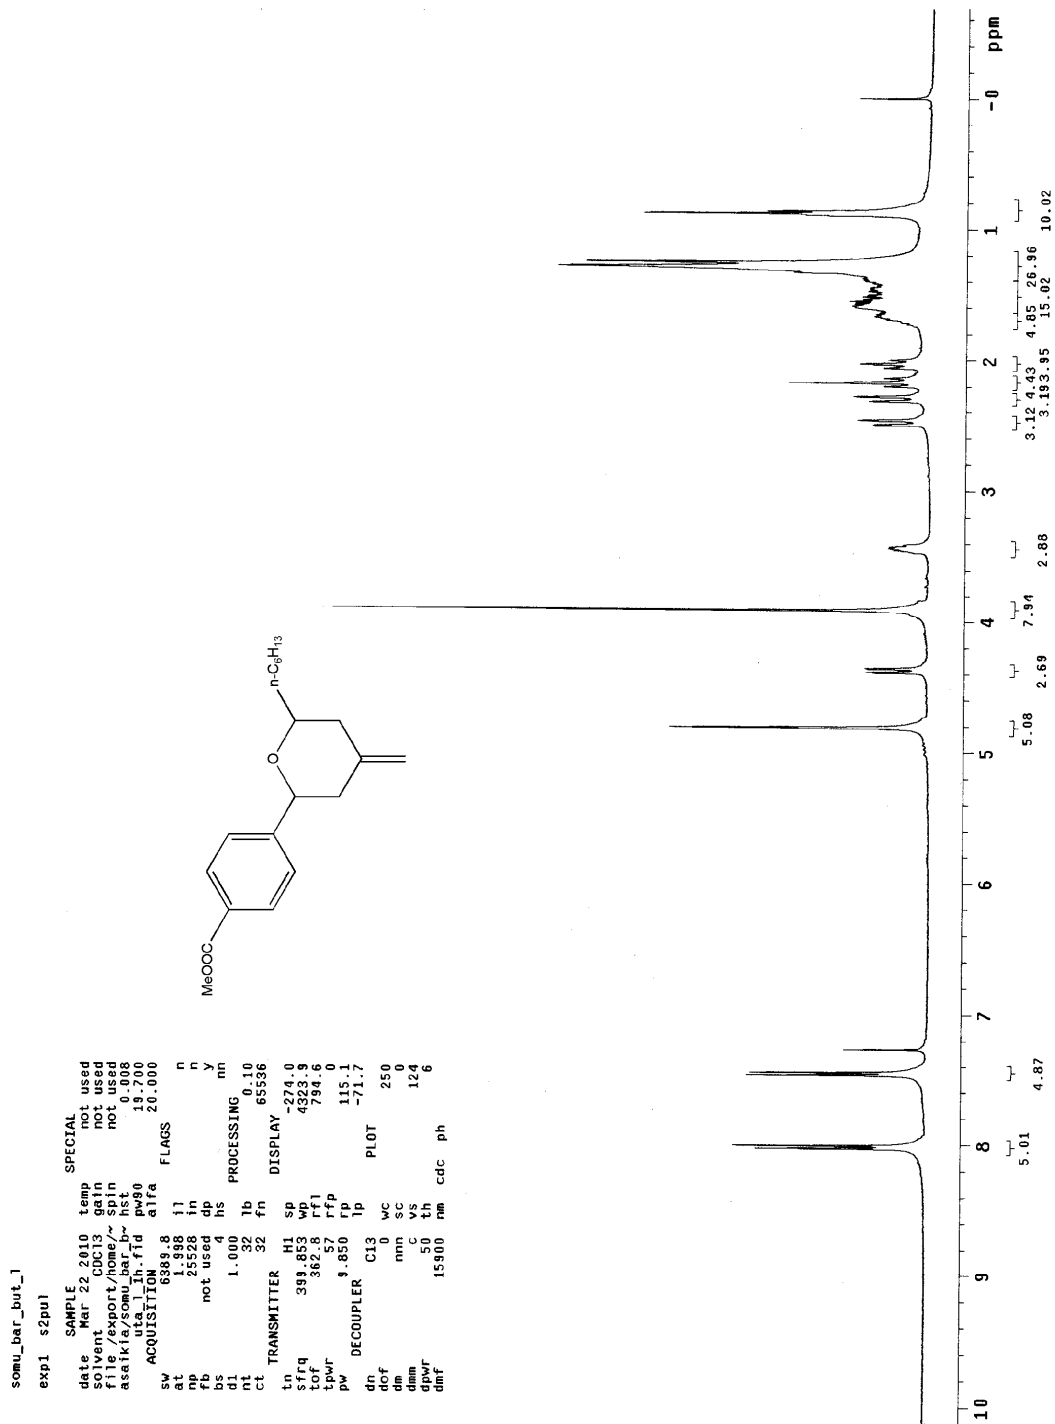

<sup>13</sup>C NMR of **8v**

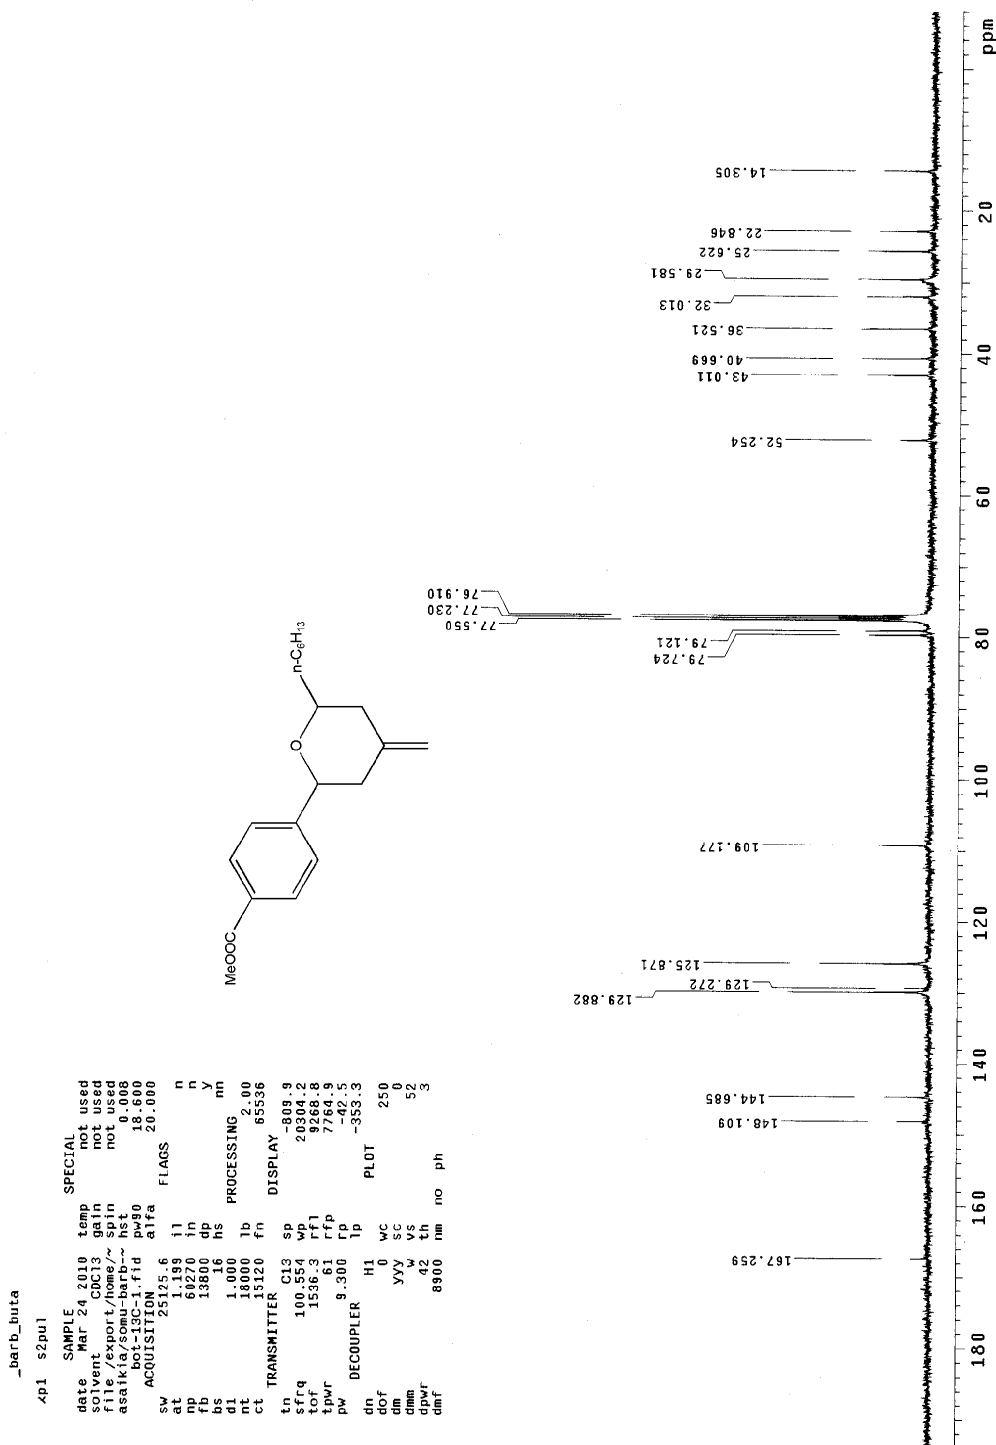

$^1\text{H}$  NMR of **8a**

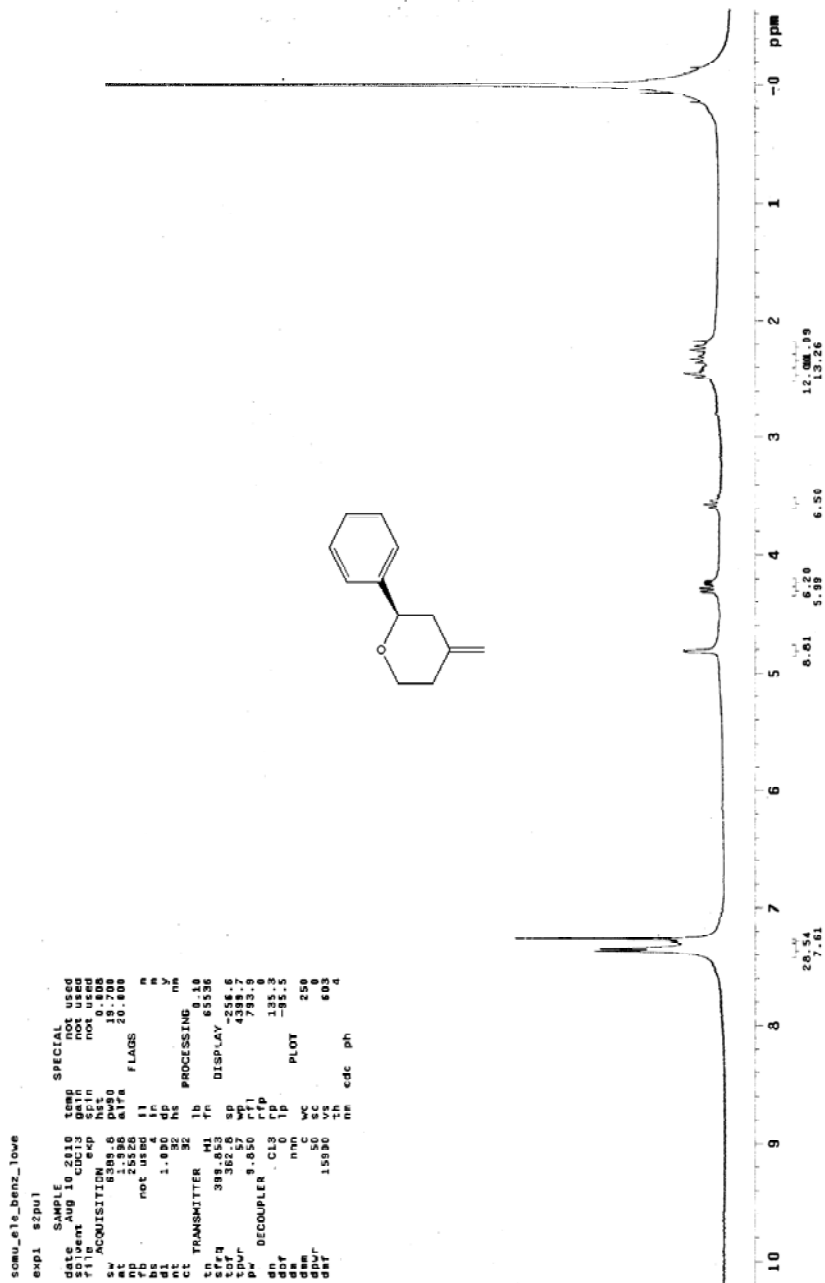

$^1\text{H}$  NMR of **10**

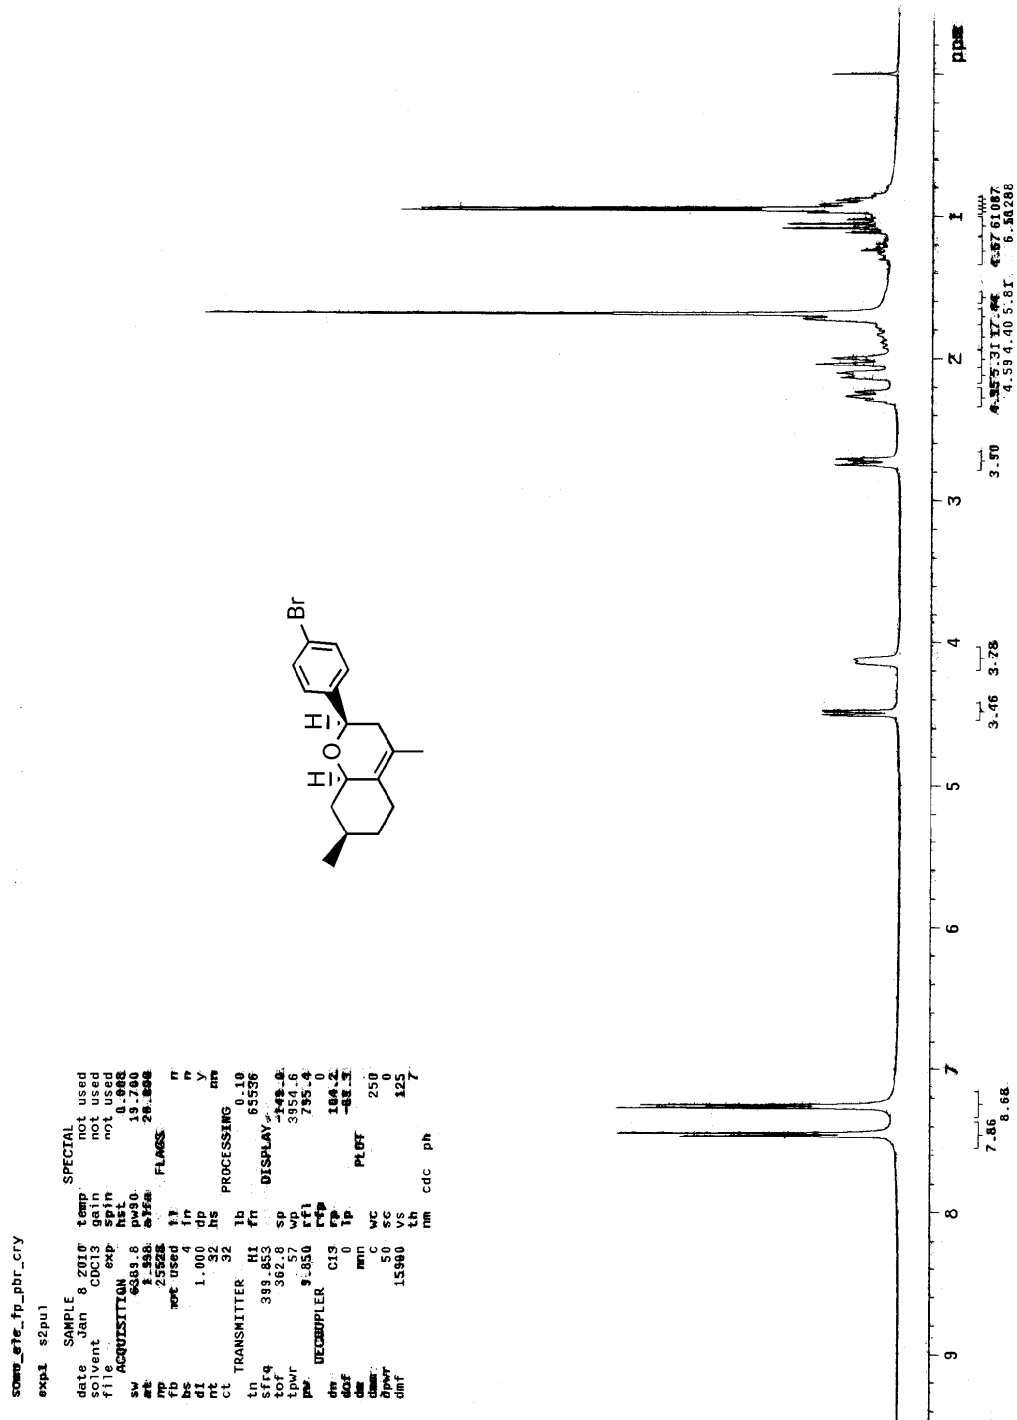

<sup>13</sup>C NMR of 10

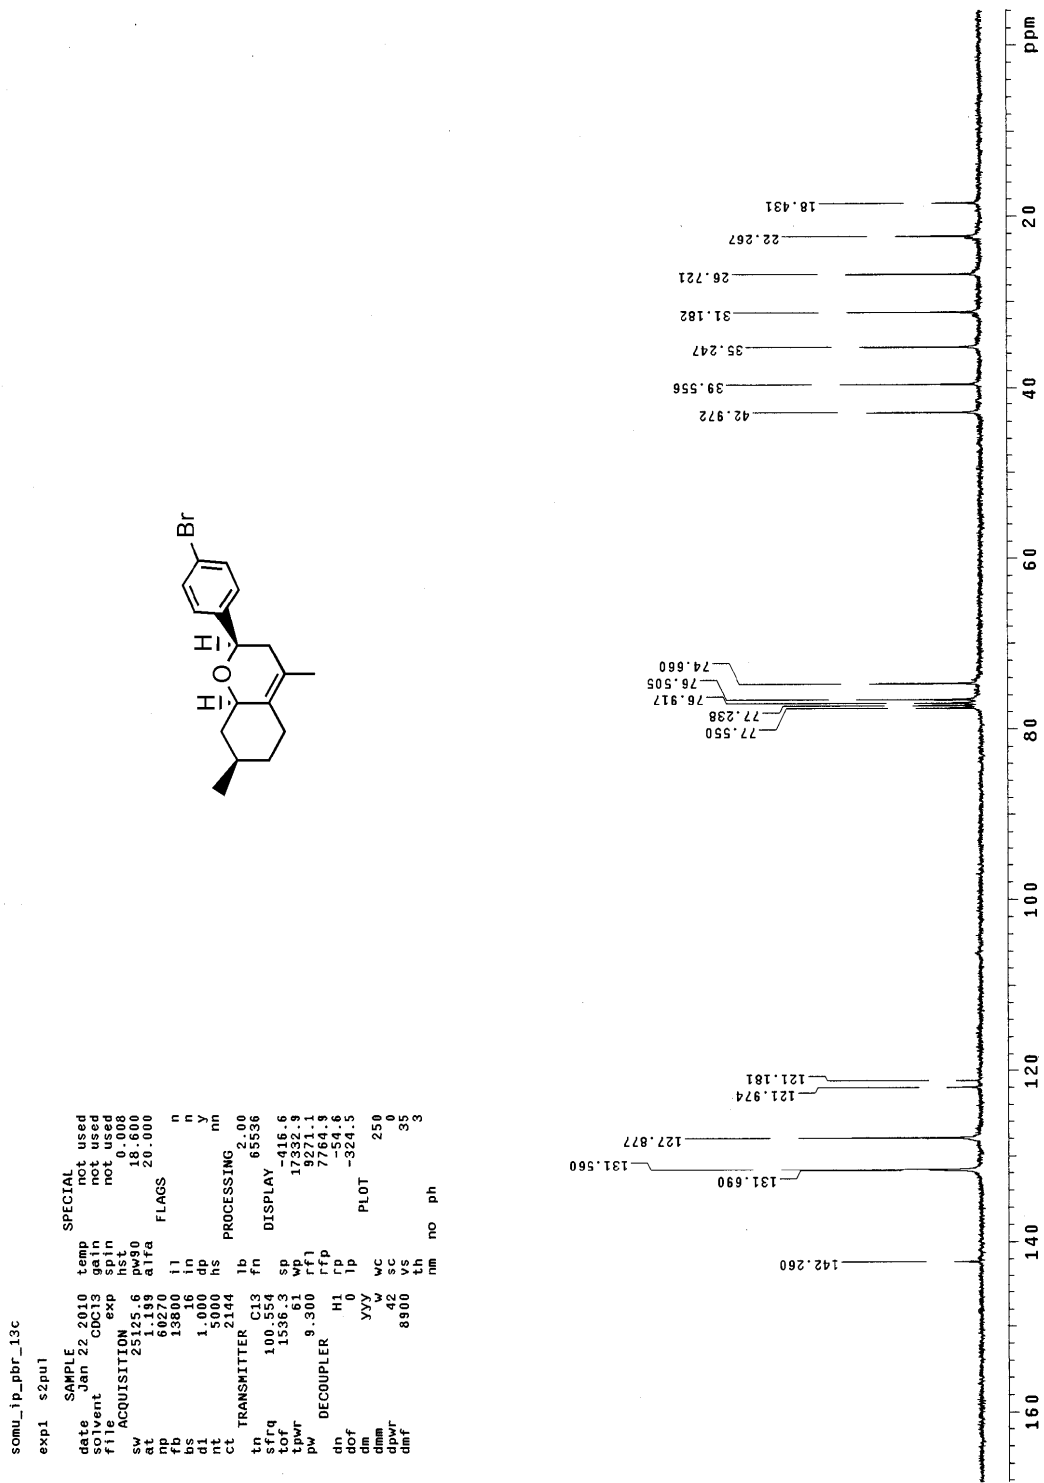



<sup>1</sup>H NMR of 11

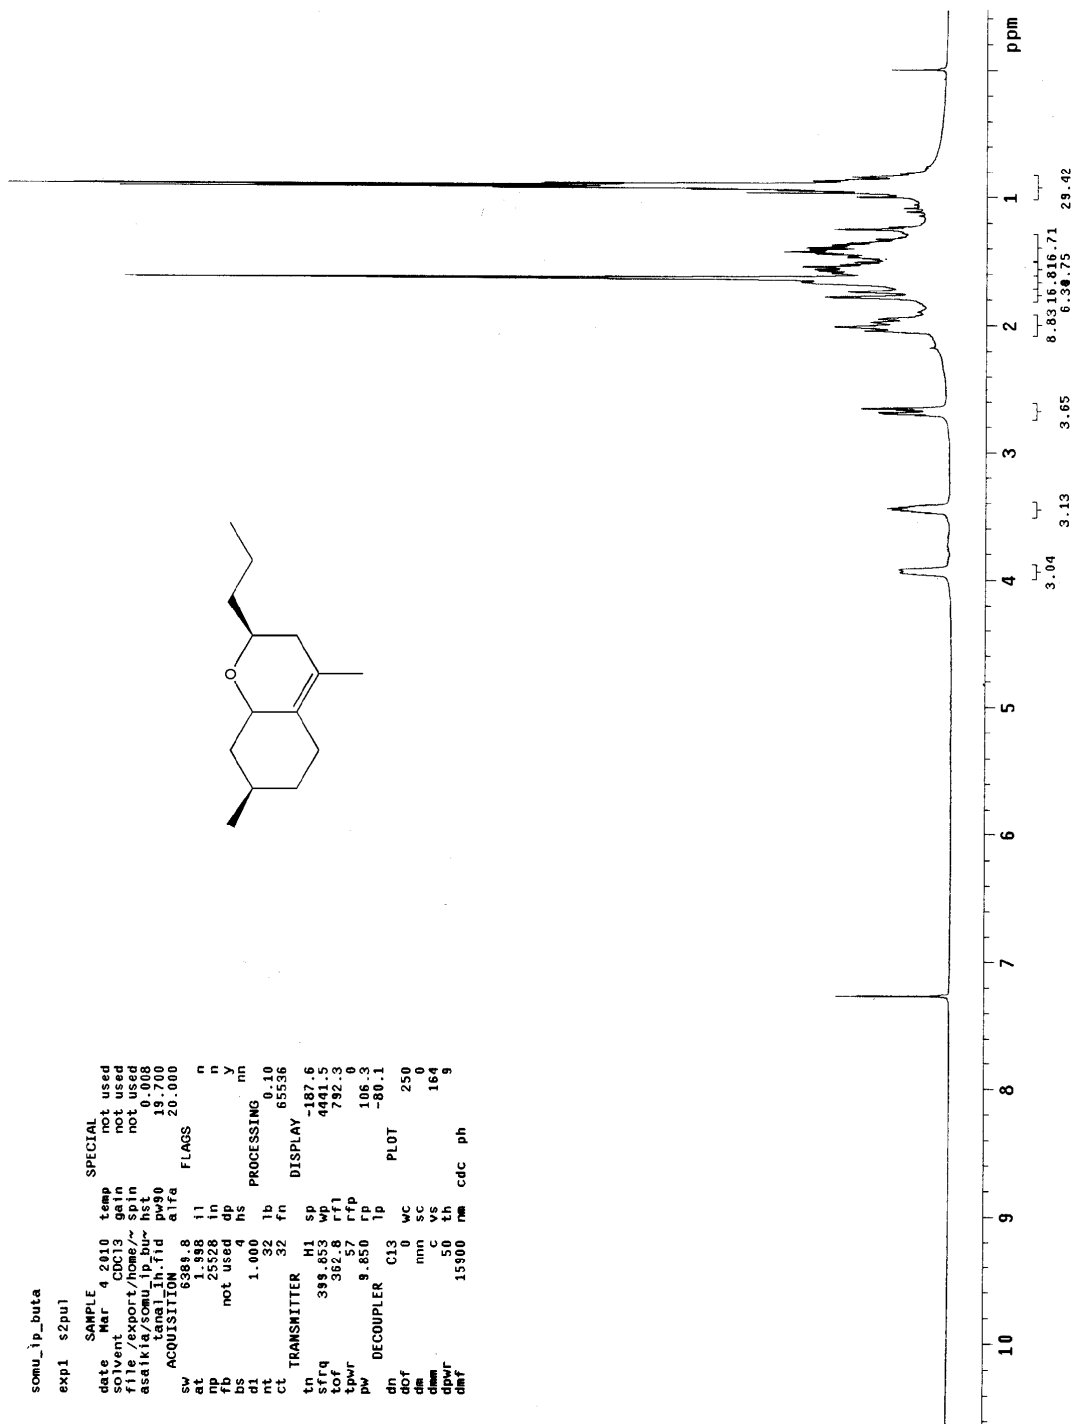

<sup>13</sup>C NMR of 11

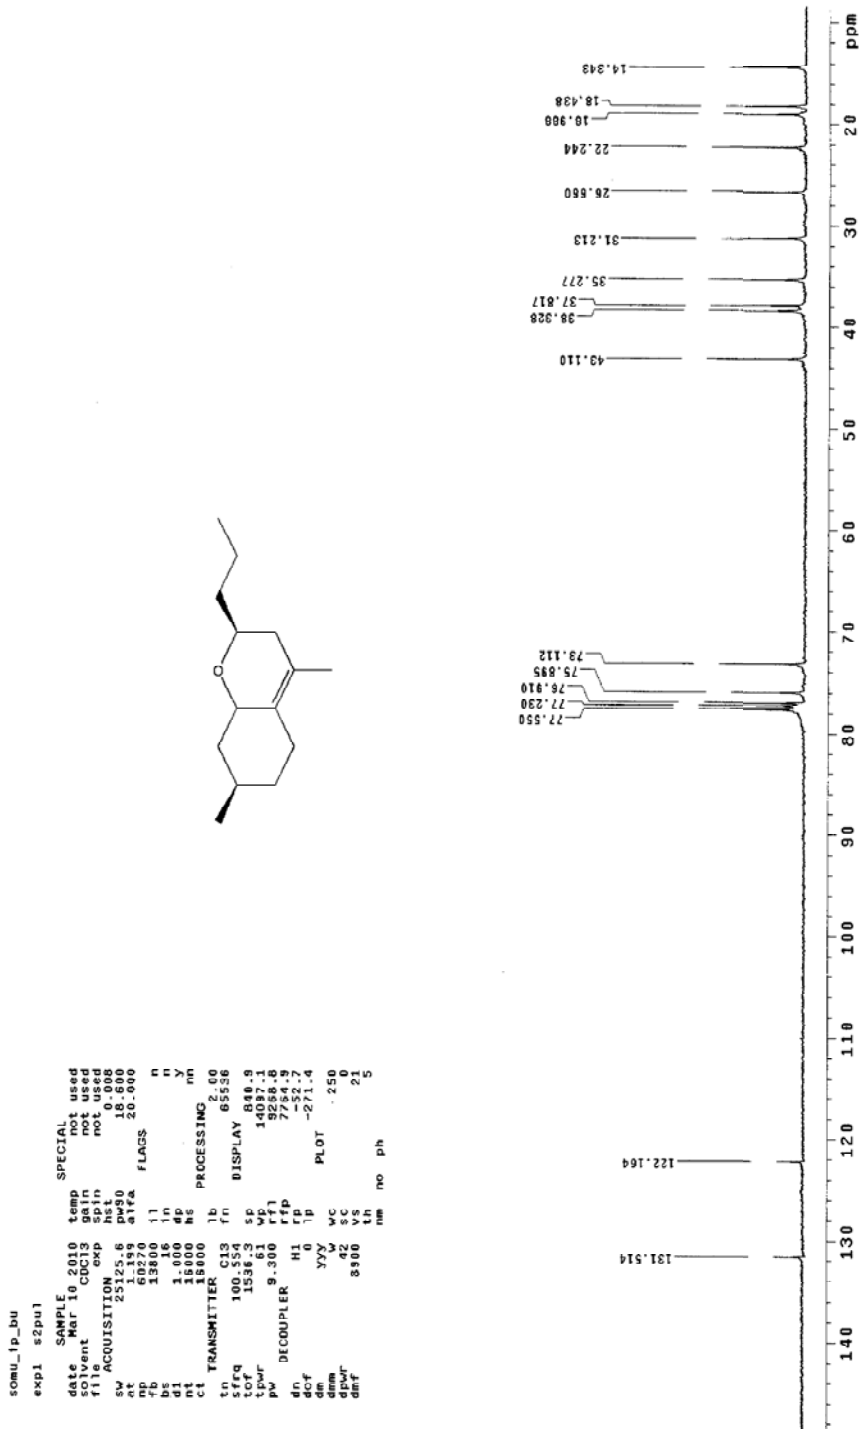

<sup>1</sup>H NMR of 17a/18a

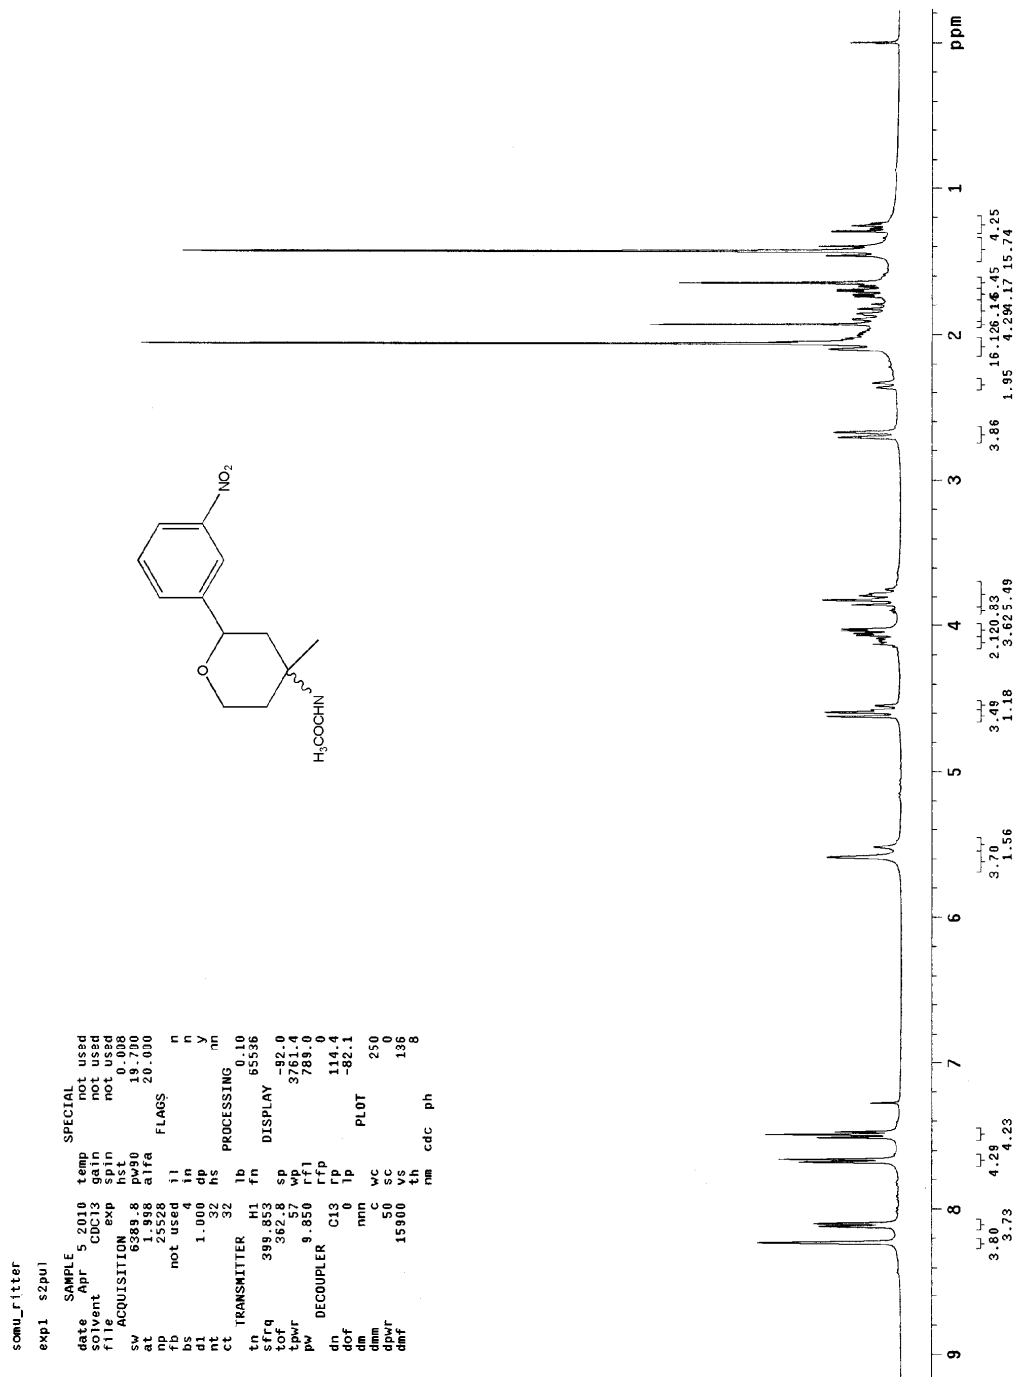

<sup>13</sup>C NMR of 17a/18a

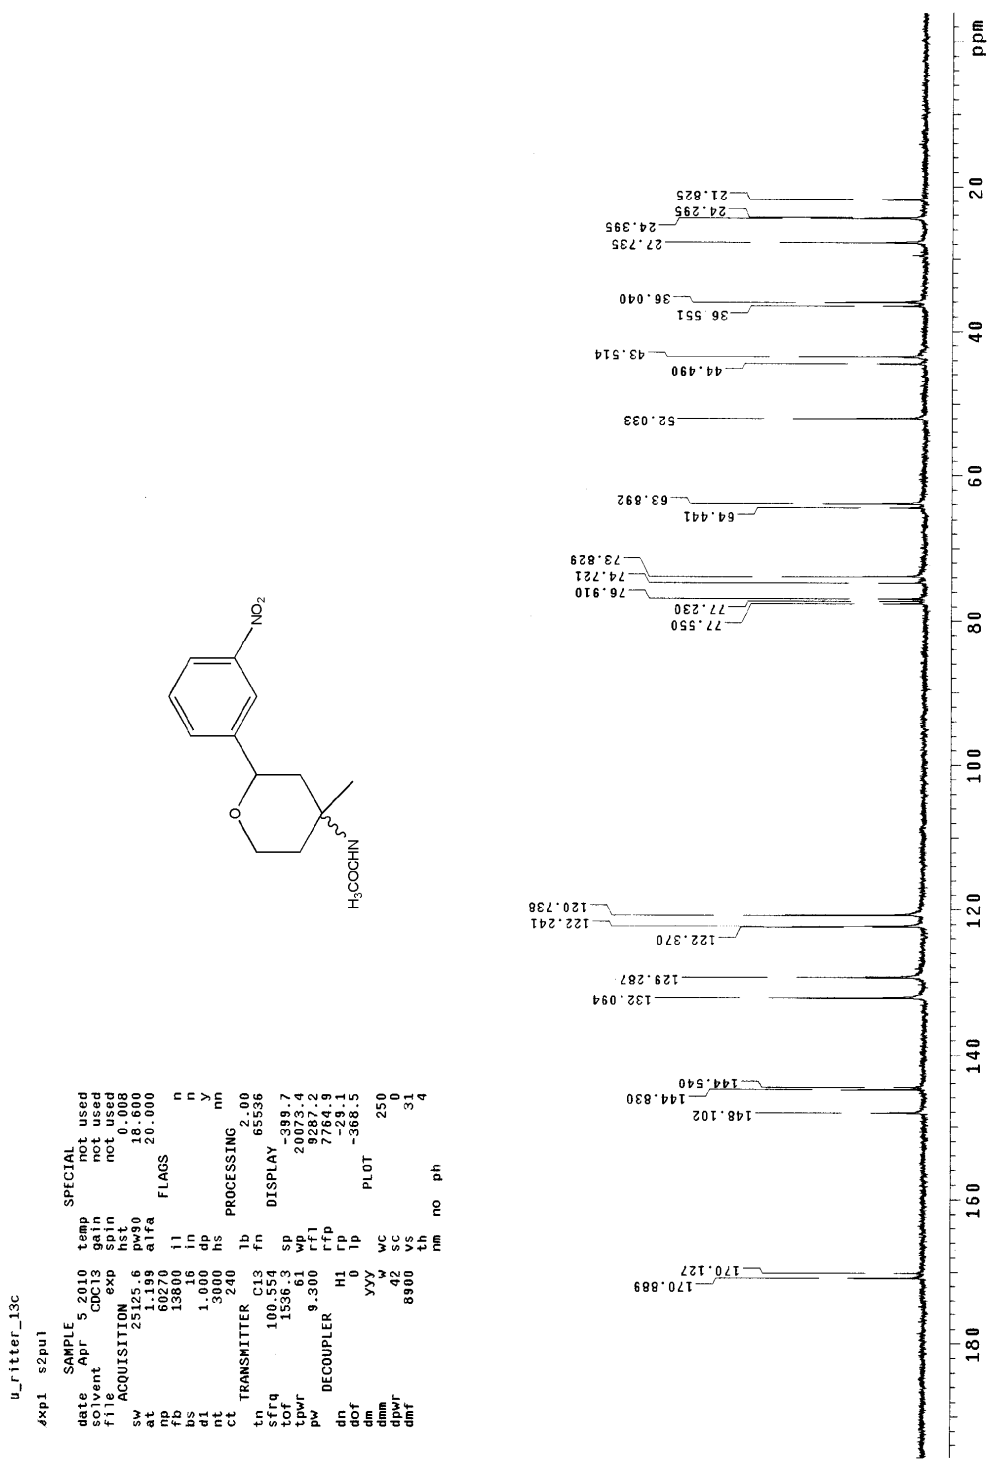

<sup>1</sup>H NMR of 17b/18b

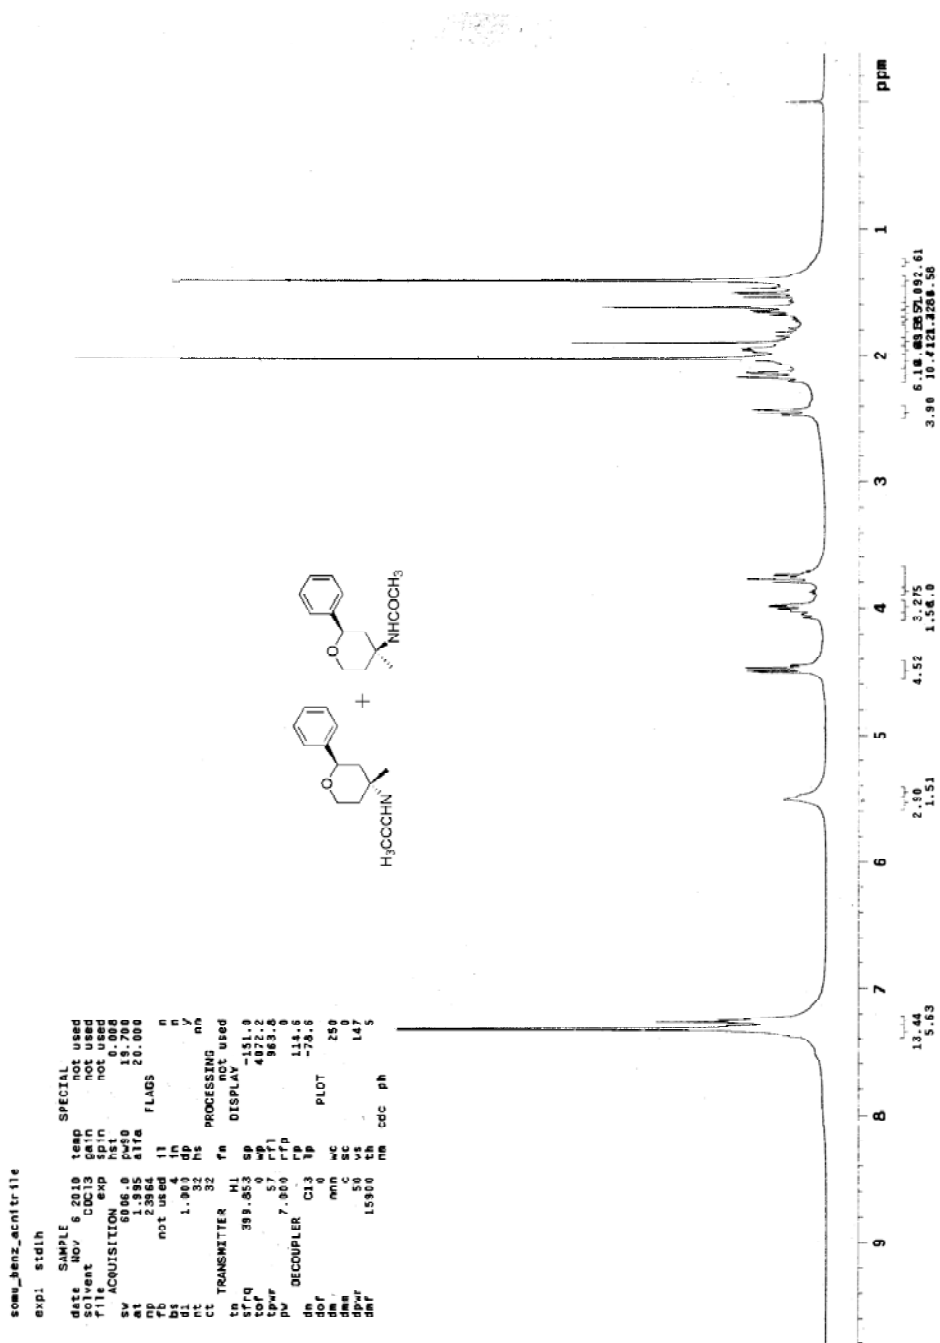

$^{13}\text{C}$  NMR of **17b/18b**

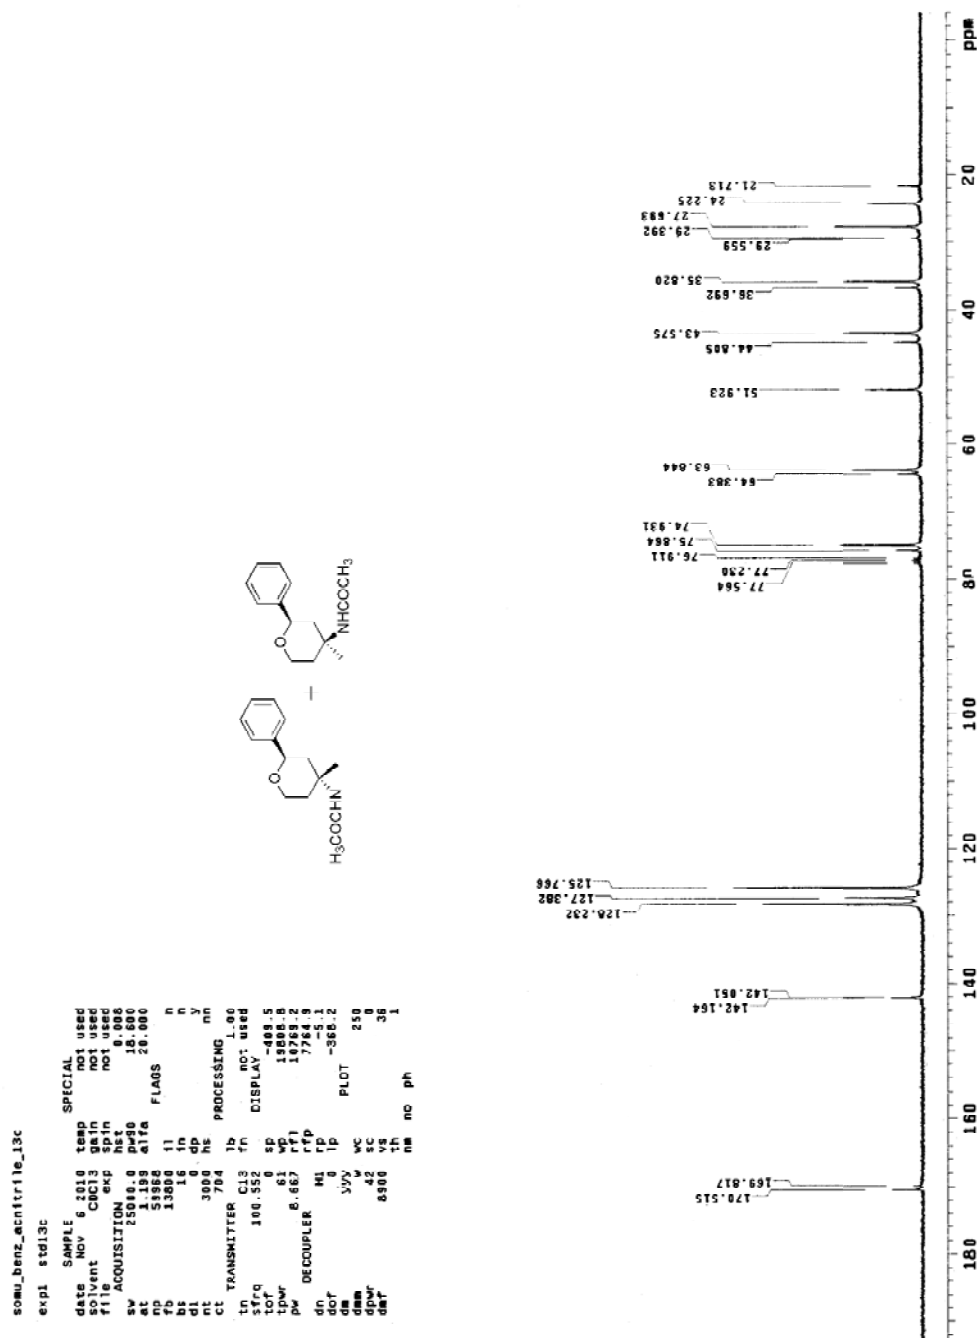

<sup>1</sup>H NMR of 17c/18c

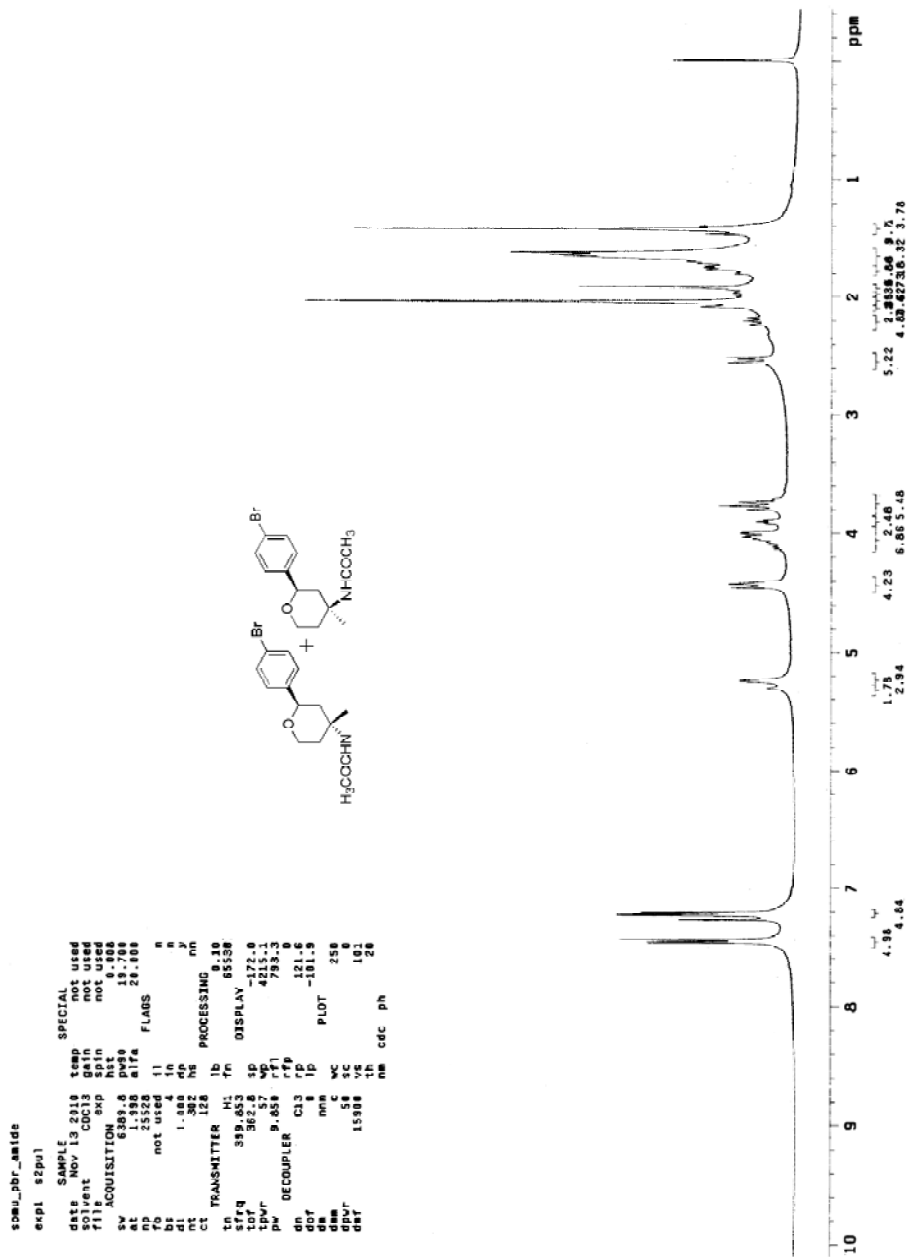

<sup>13</sup>C NMR of 17c/18c

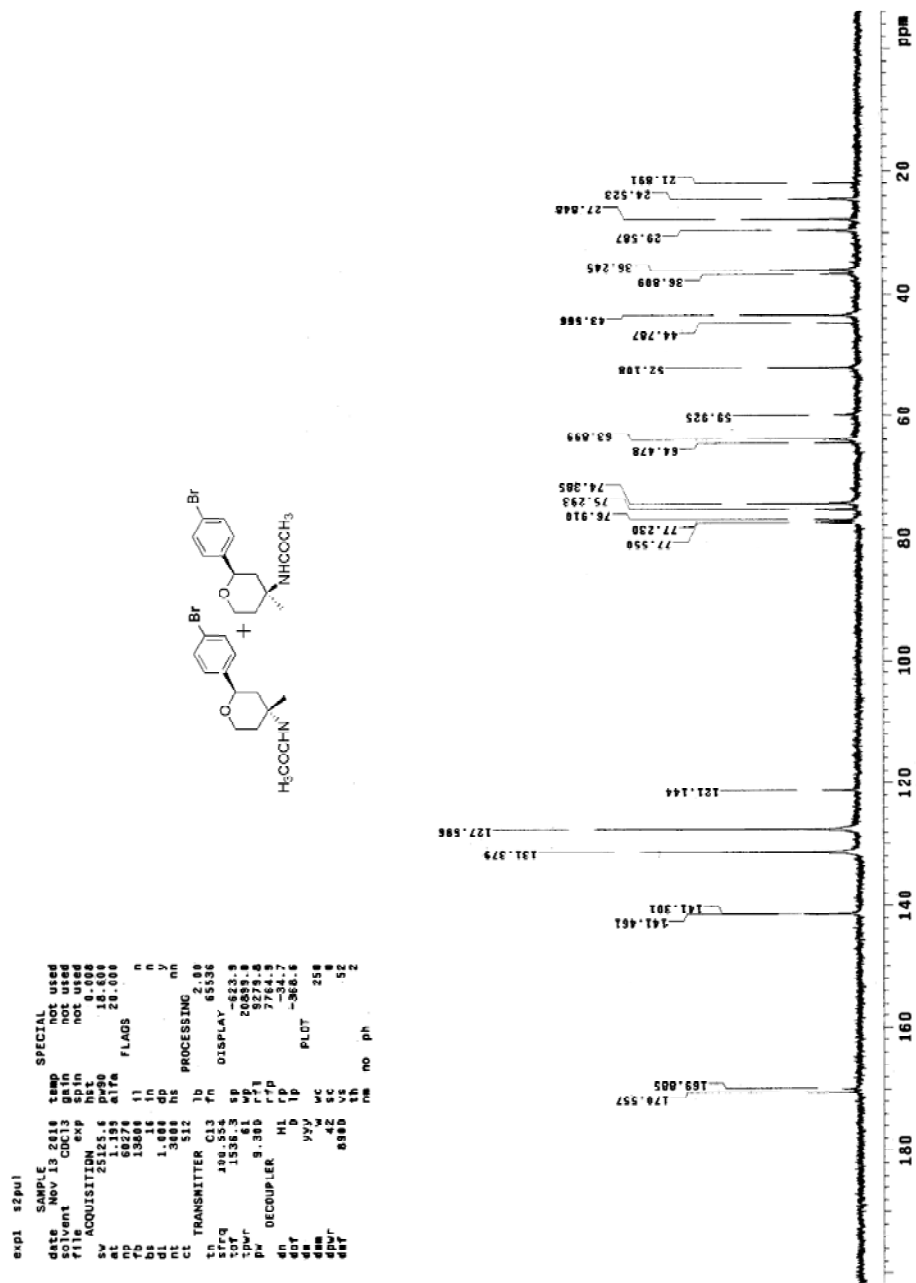



$^1\text{H}$  NMR of **17d/18d**

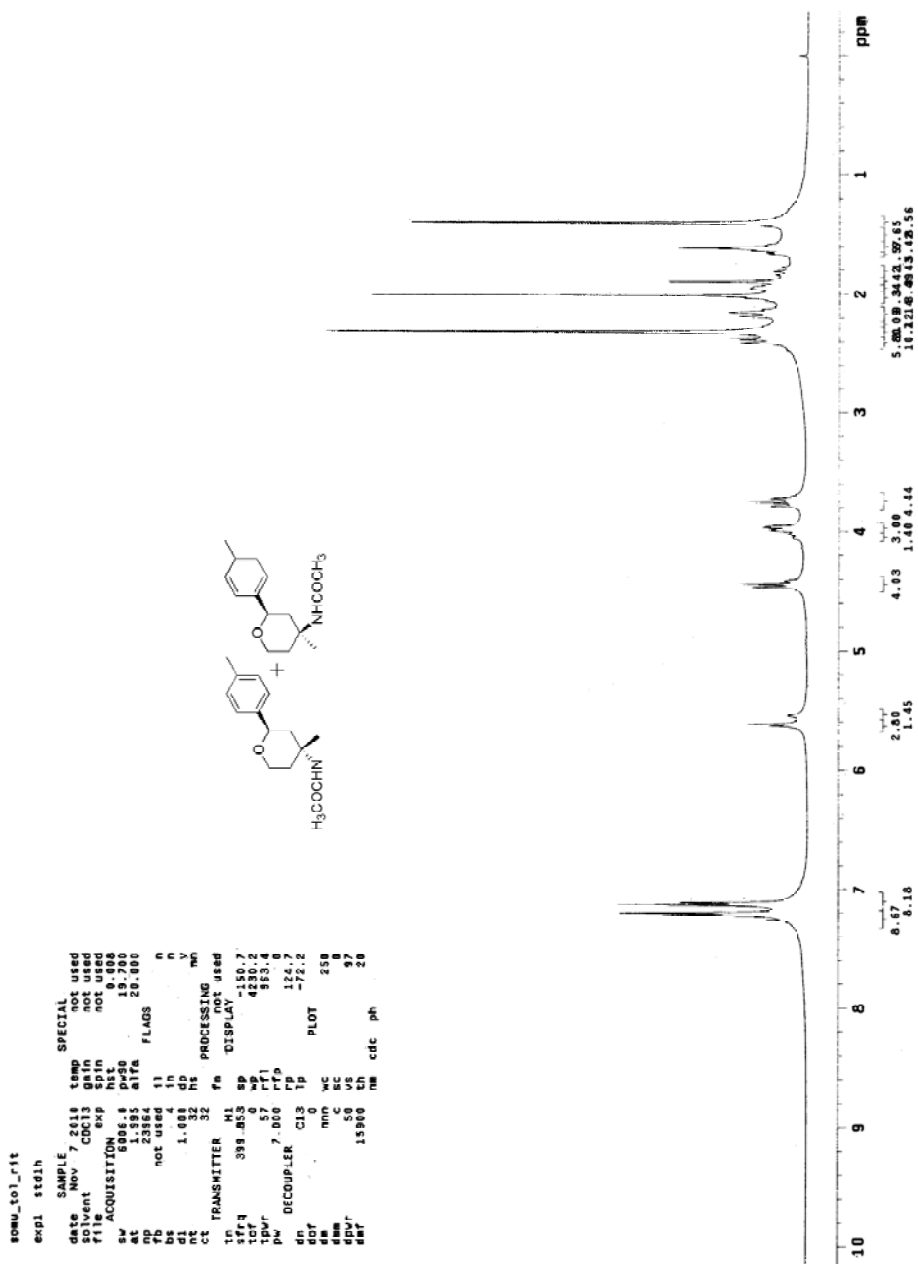

### <sup>13</sup>C NMR of 17d/18d

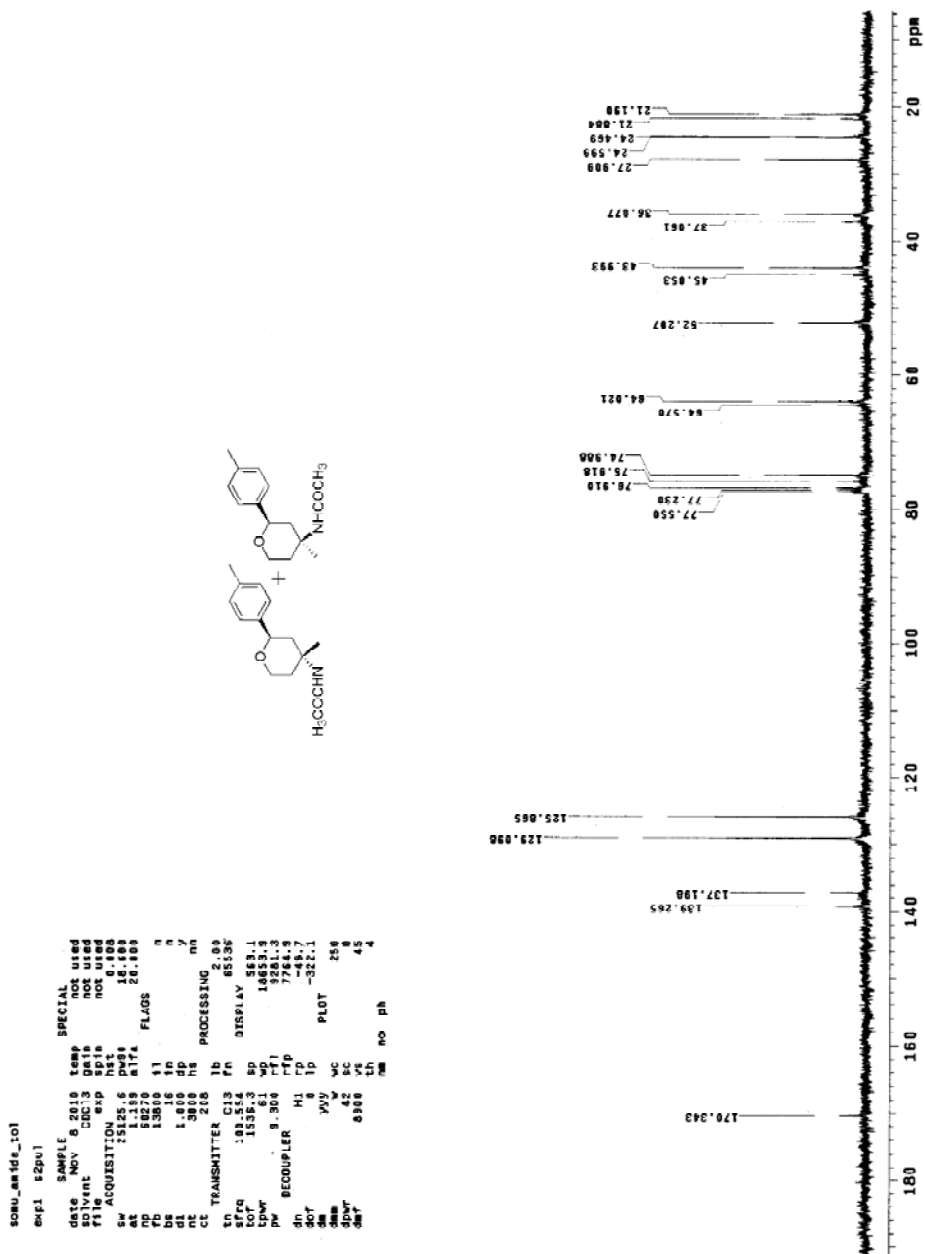

$^1\text{H}$  NMR of 17e/18e

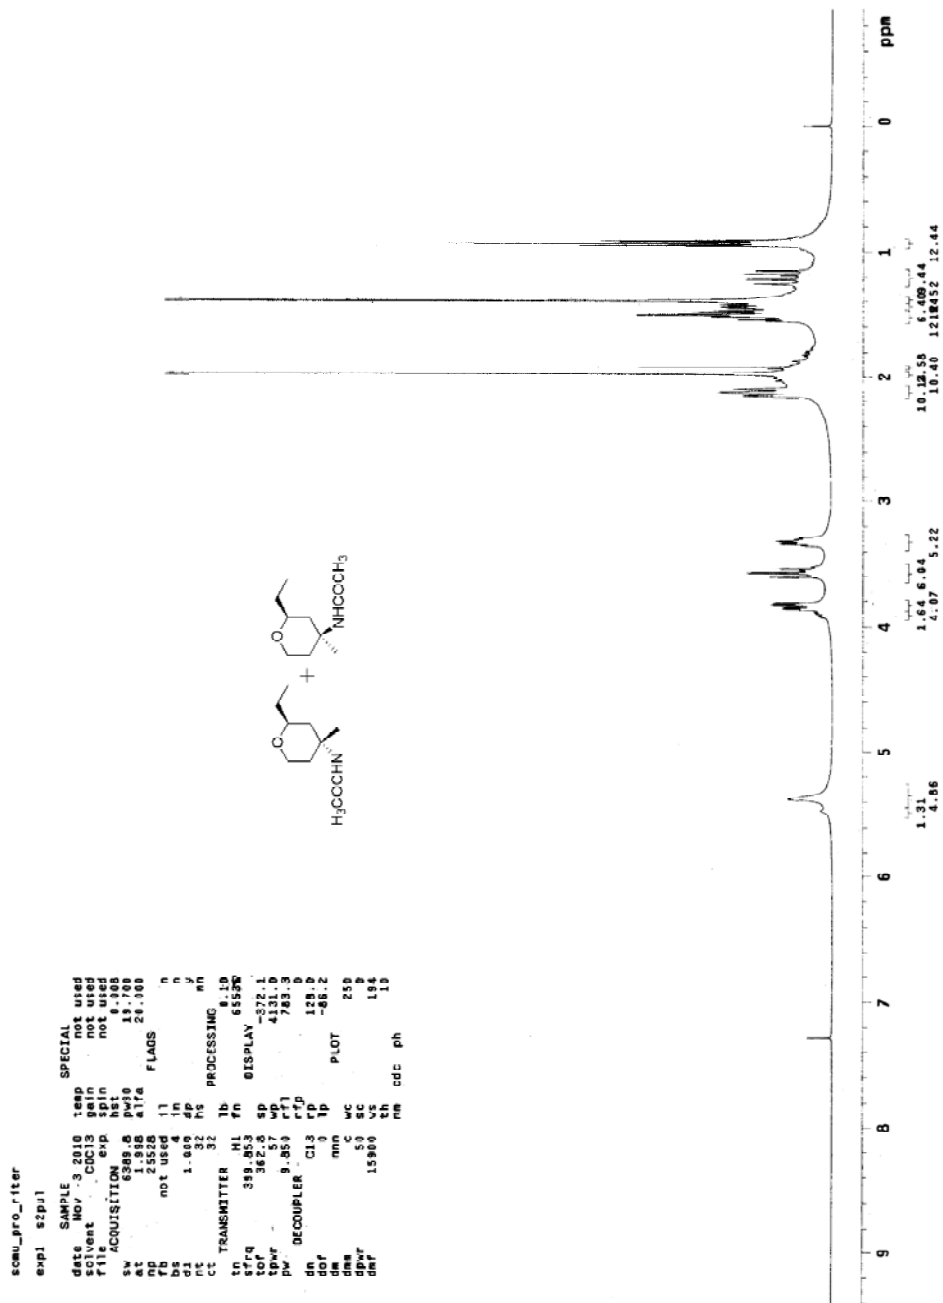

$^{13}\text{C}$  NMR of 17e/18e

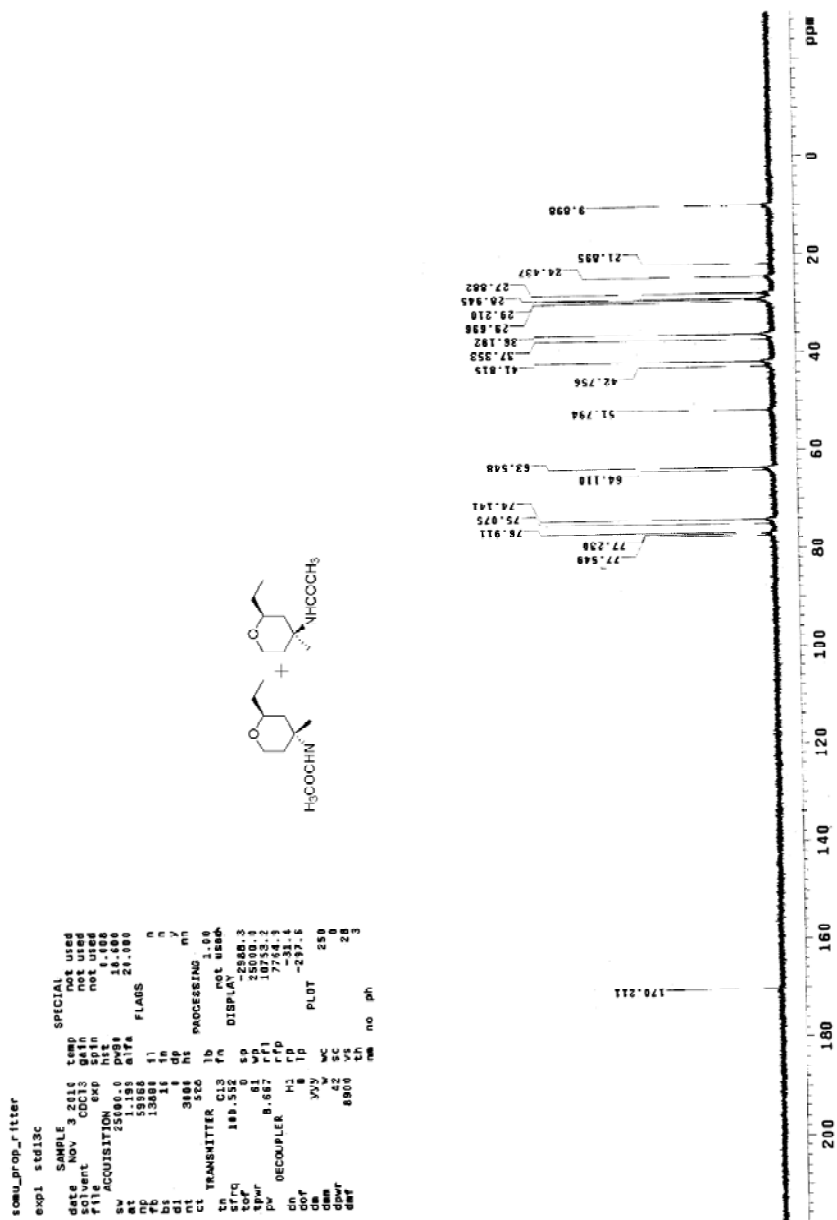

<sup>1</sup>H NMR of 17f/18f

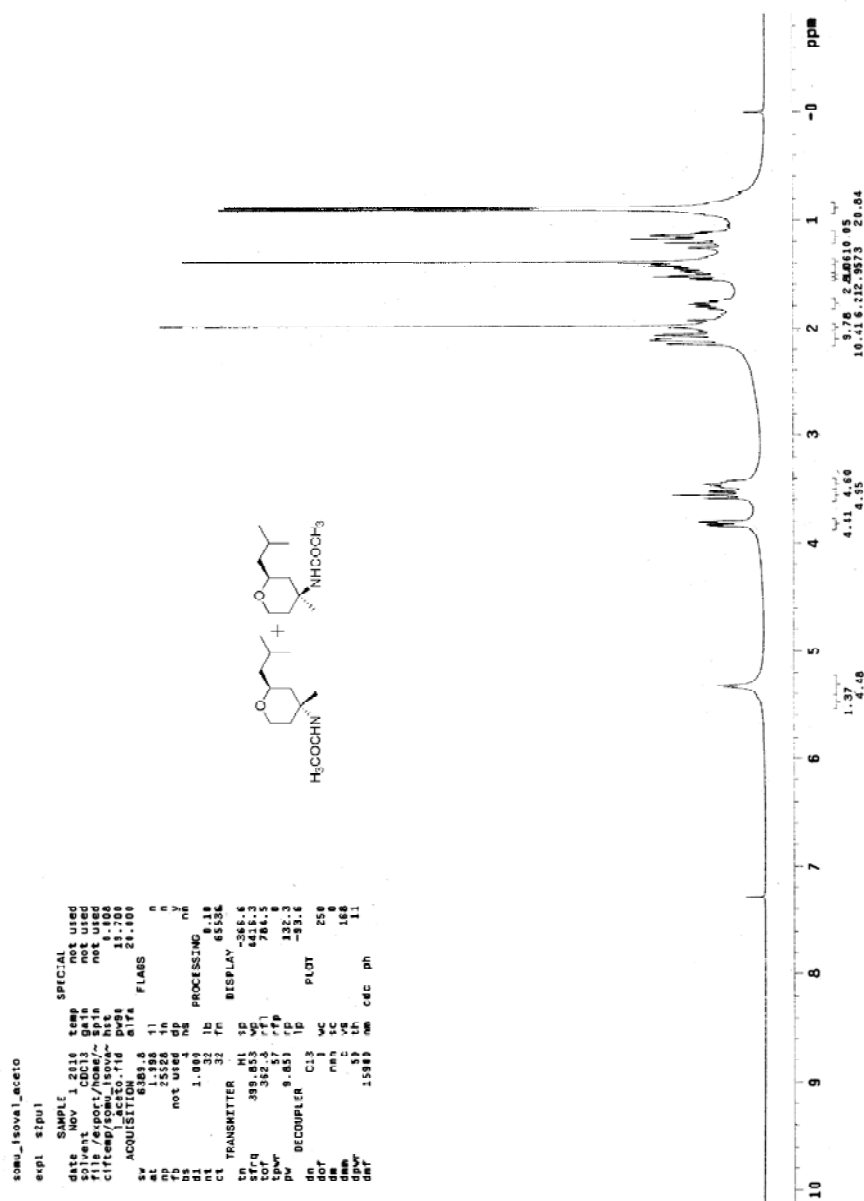

<sup>13</sup>C NMR of 17f/18f

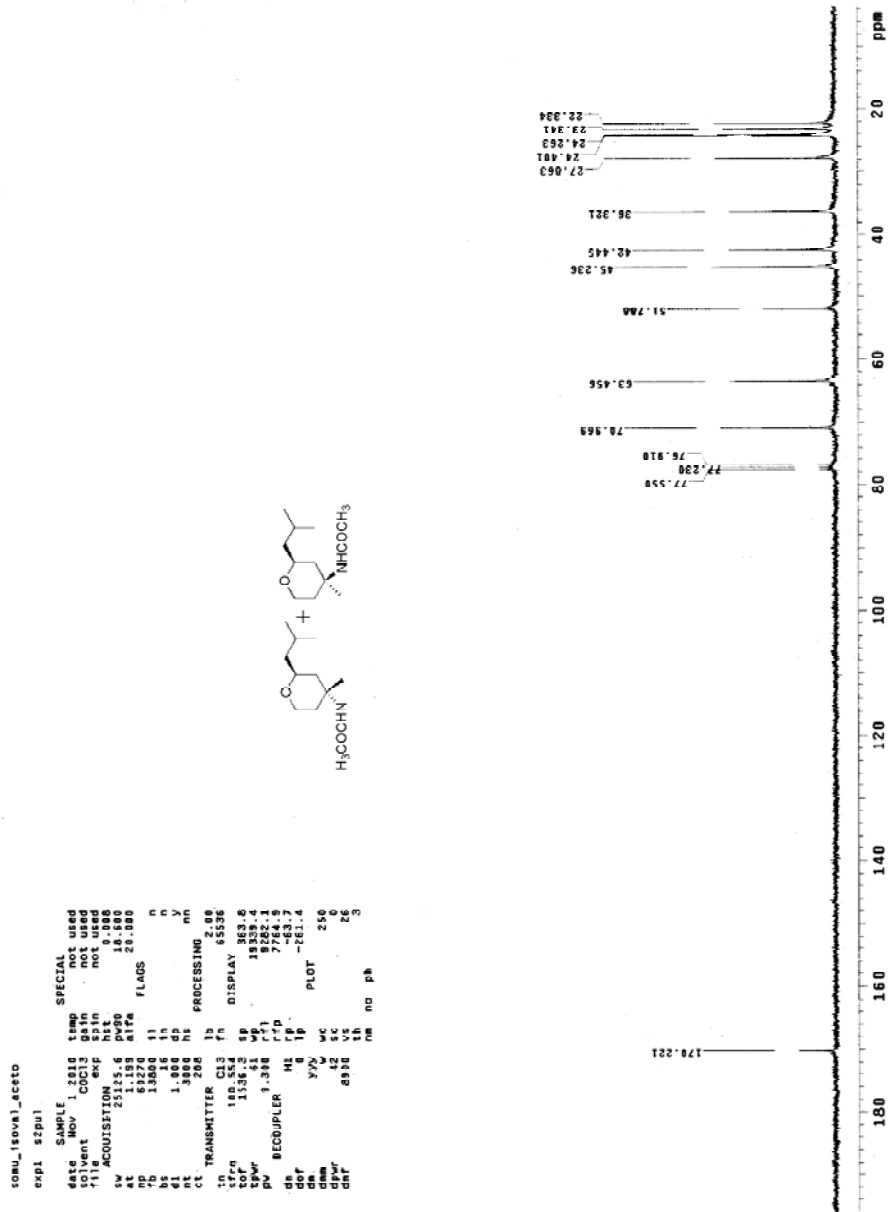

<sup>1</sup>H NMR of 17g/18g

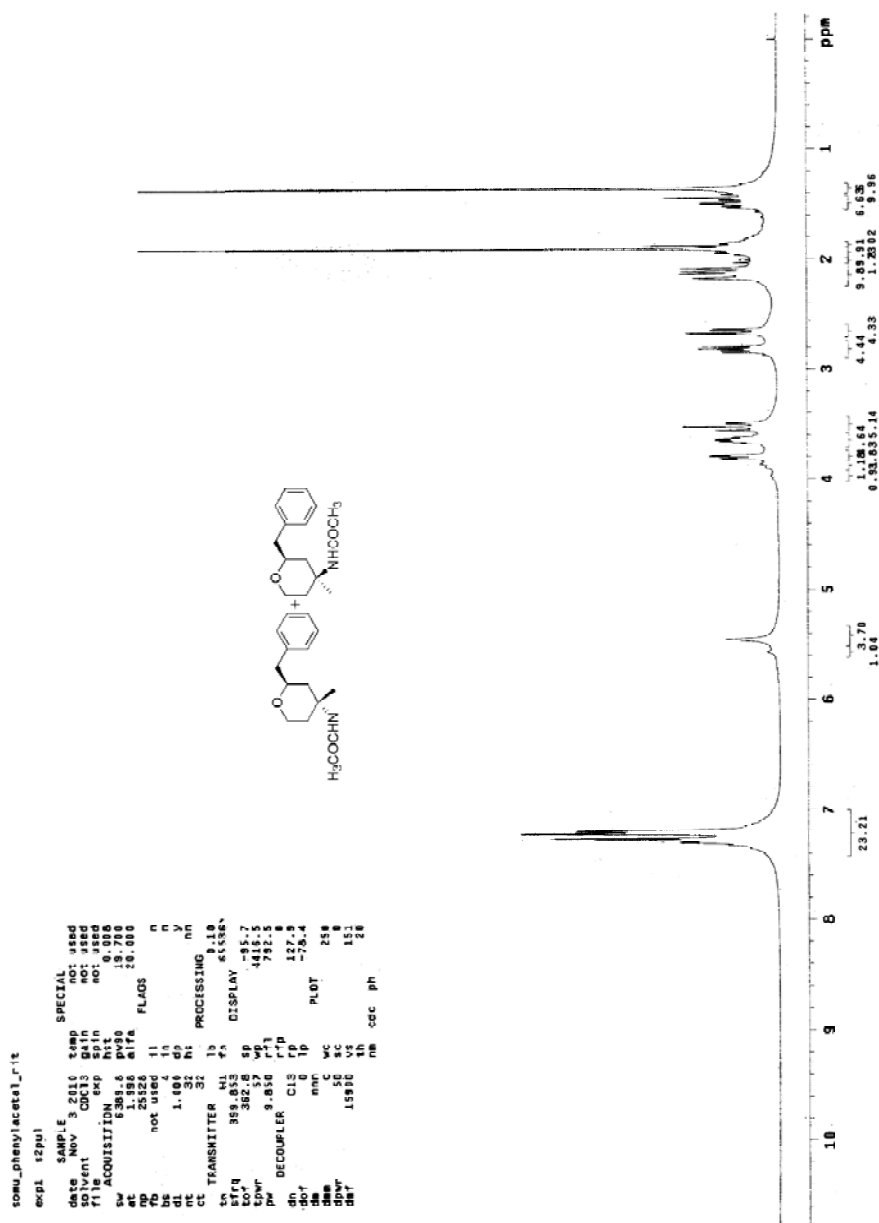

<sup>13</sup>C NMR of 17g/18g

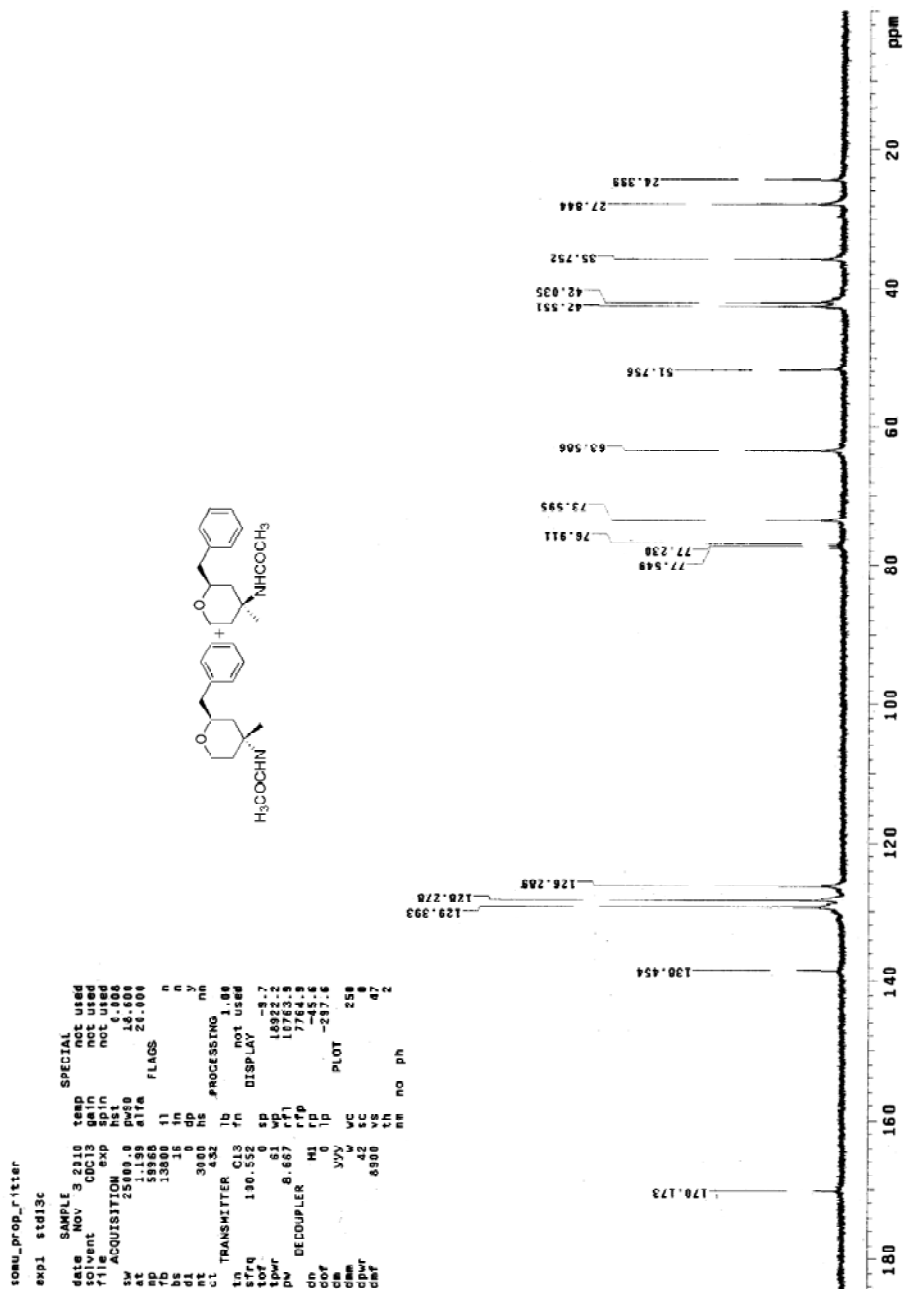



$^1\text{H}$  NMR of 17h/18h

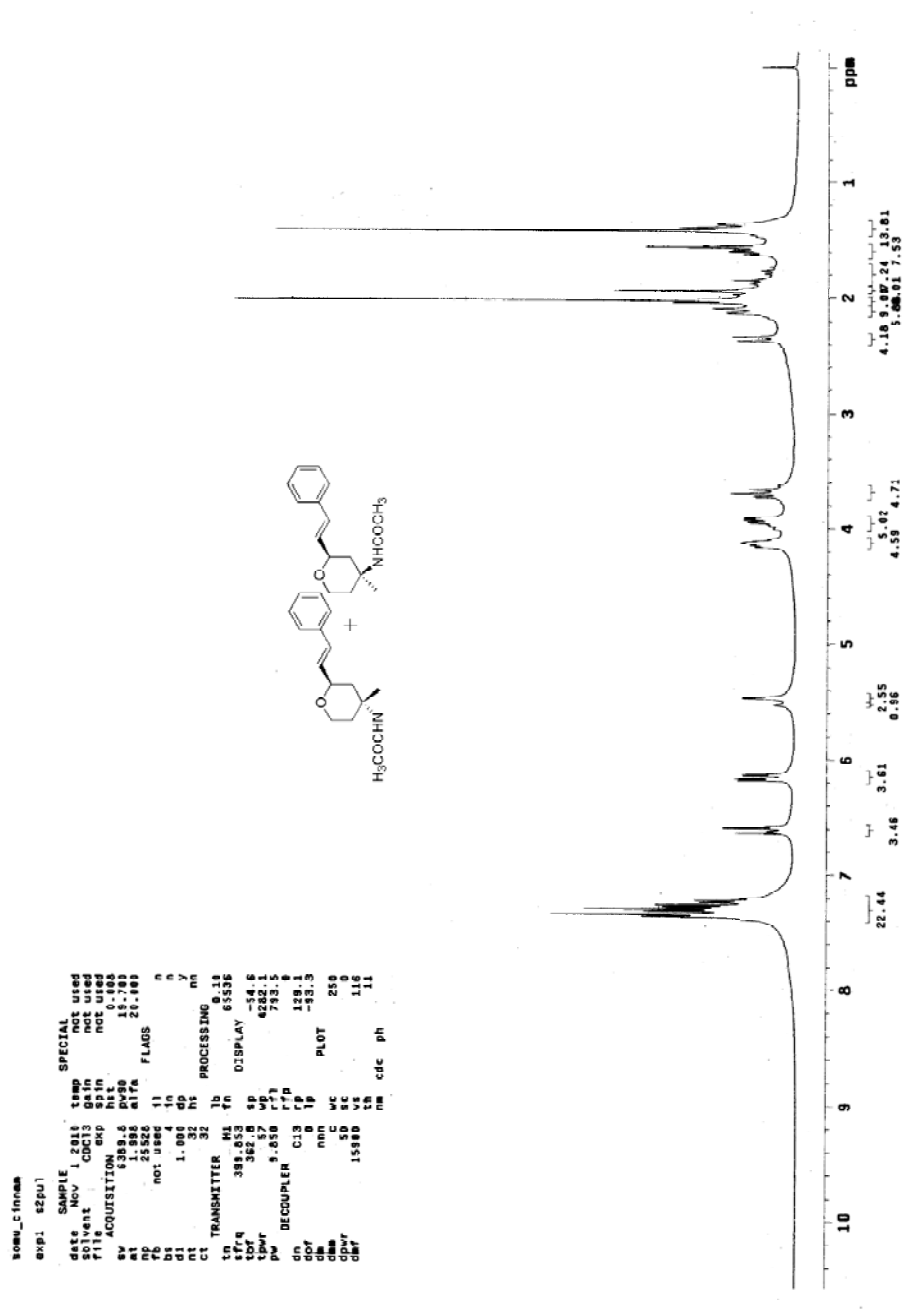

<sup>13</sup>C NMR of 17h/18h

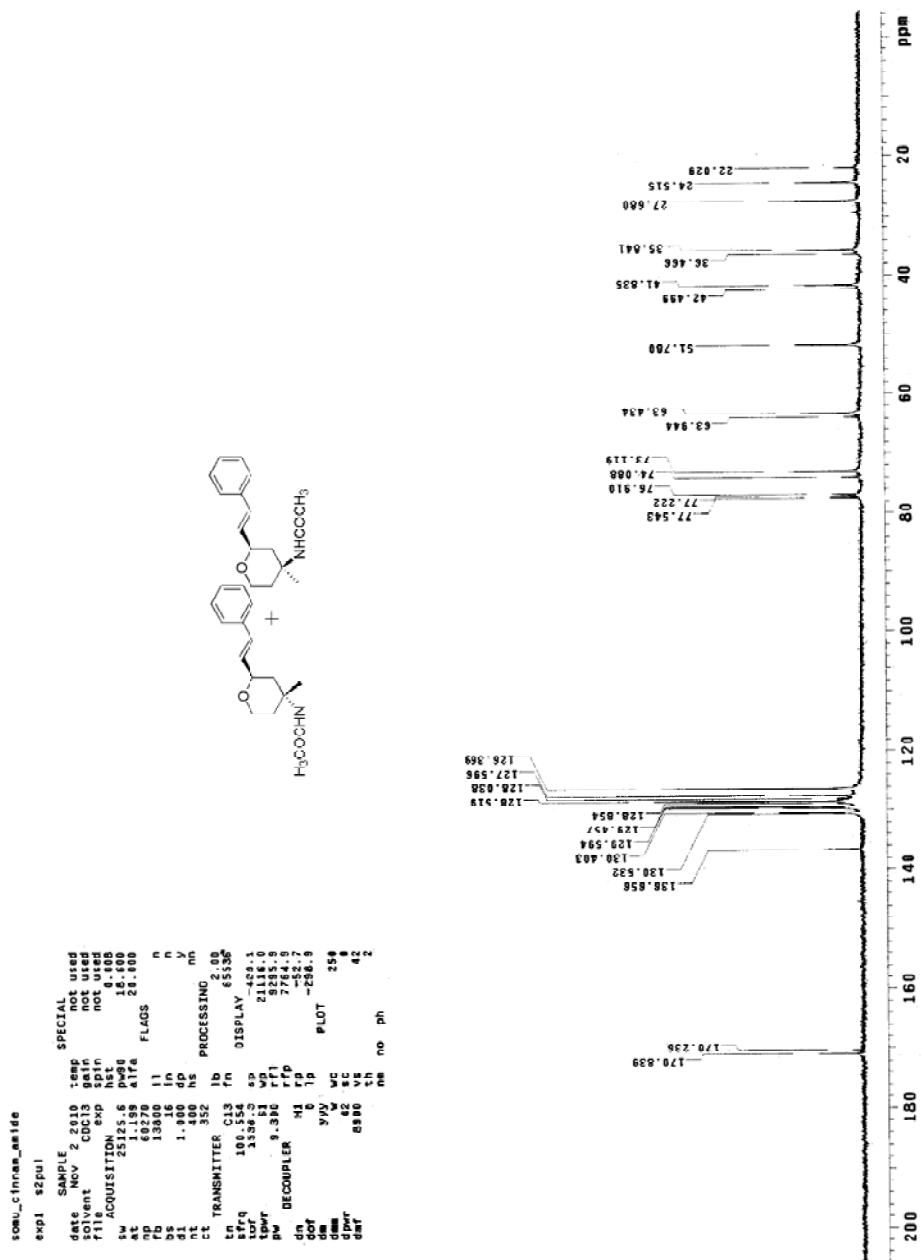

<sup>1</sup>H NMR of **17i/18i**

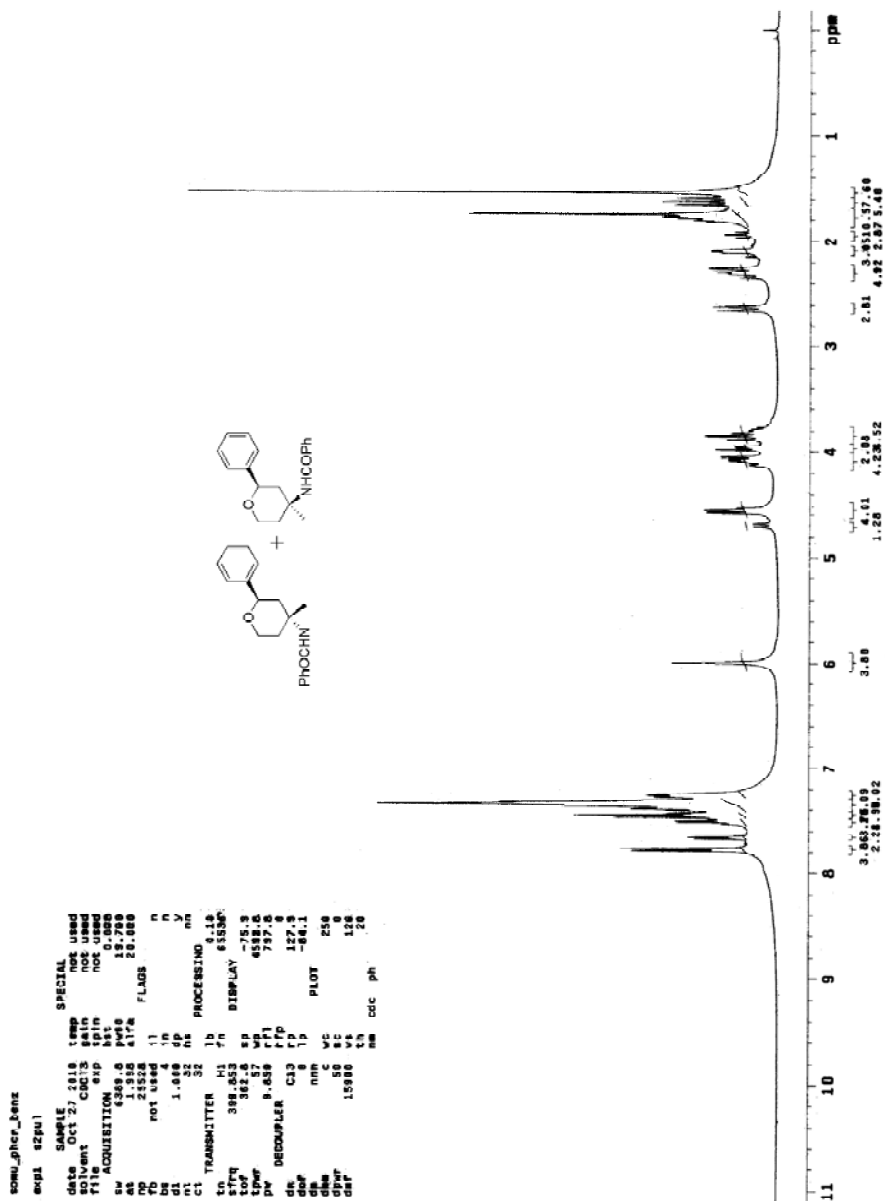

<sup>13</sup>C NMR of **17i/18i**

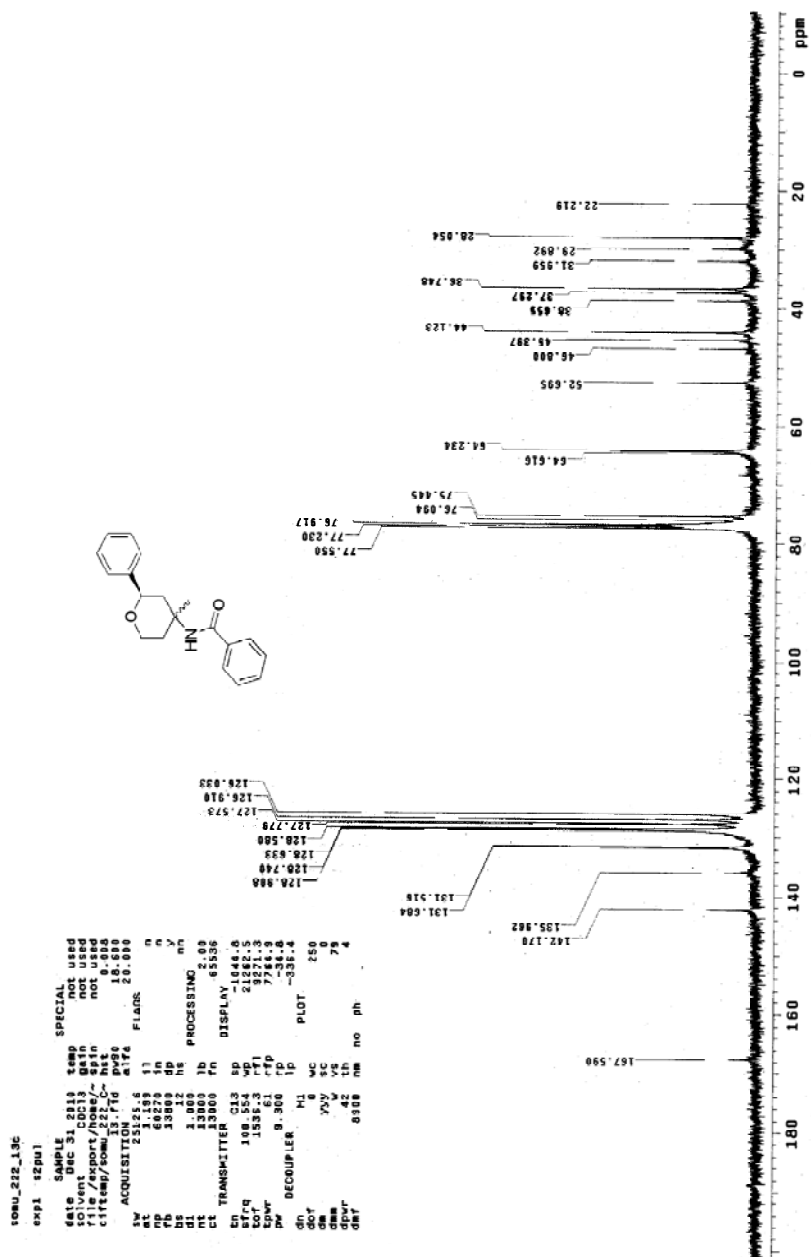

<sup>1</sup>H NMR of **17j**

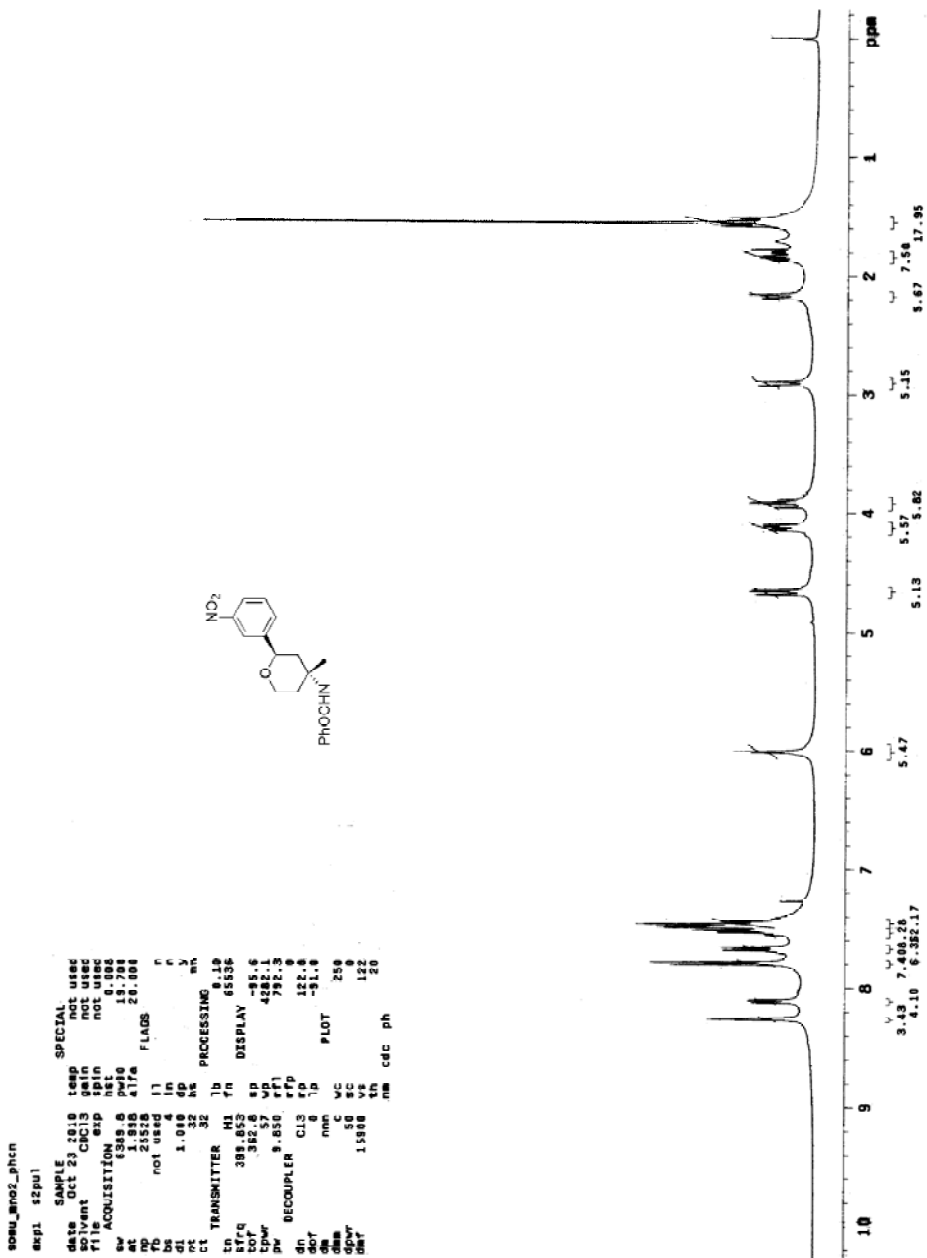

<sup>13</sup>C NMR of 17j

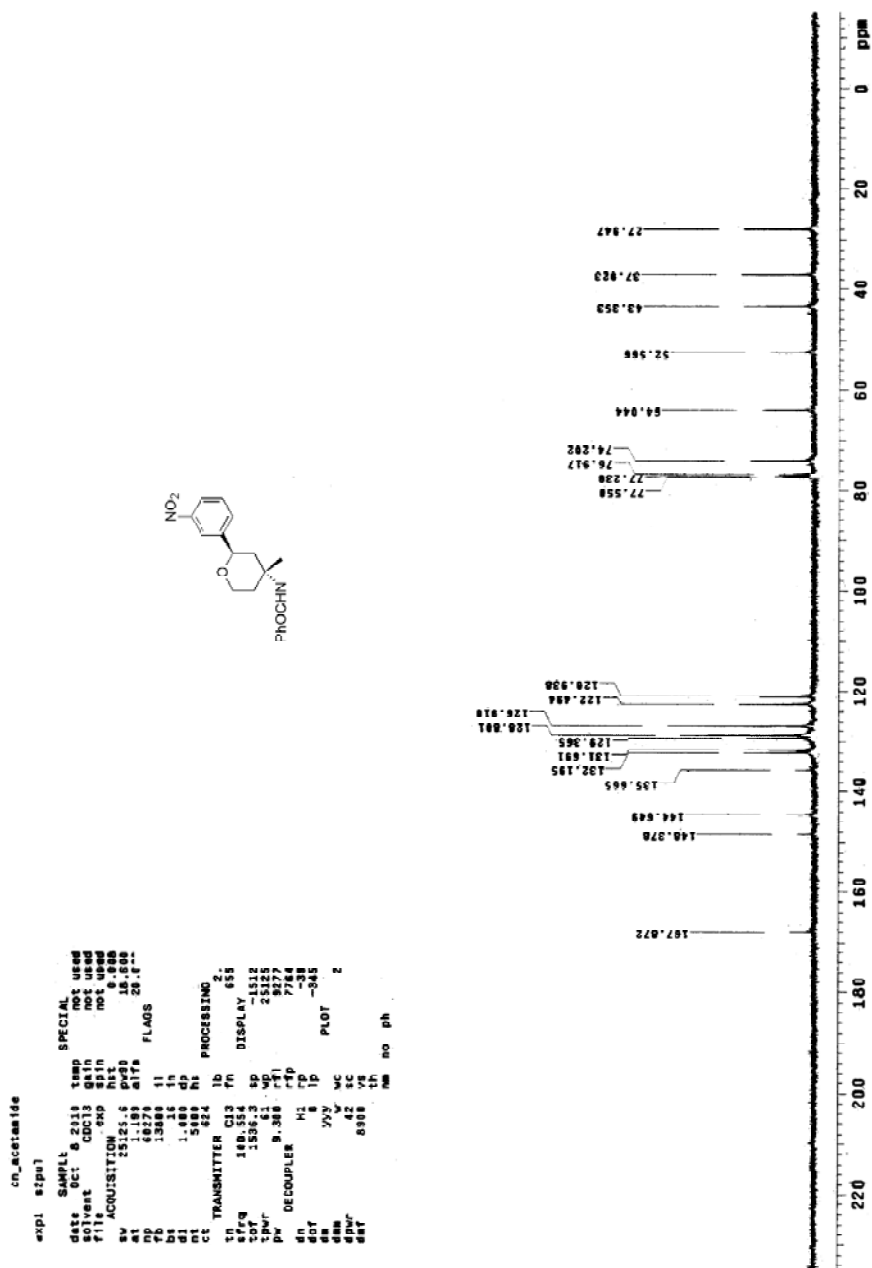

<sup>1</sup>H NMR of 17k/18k

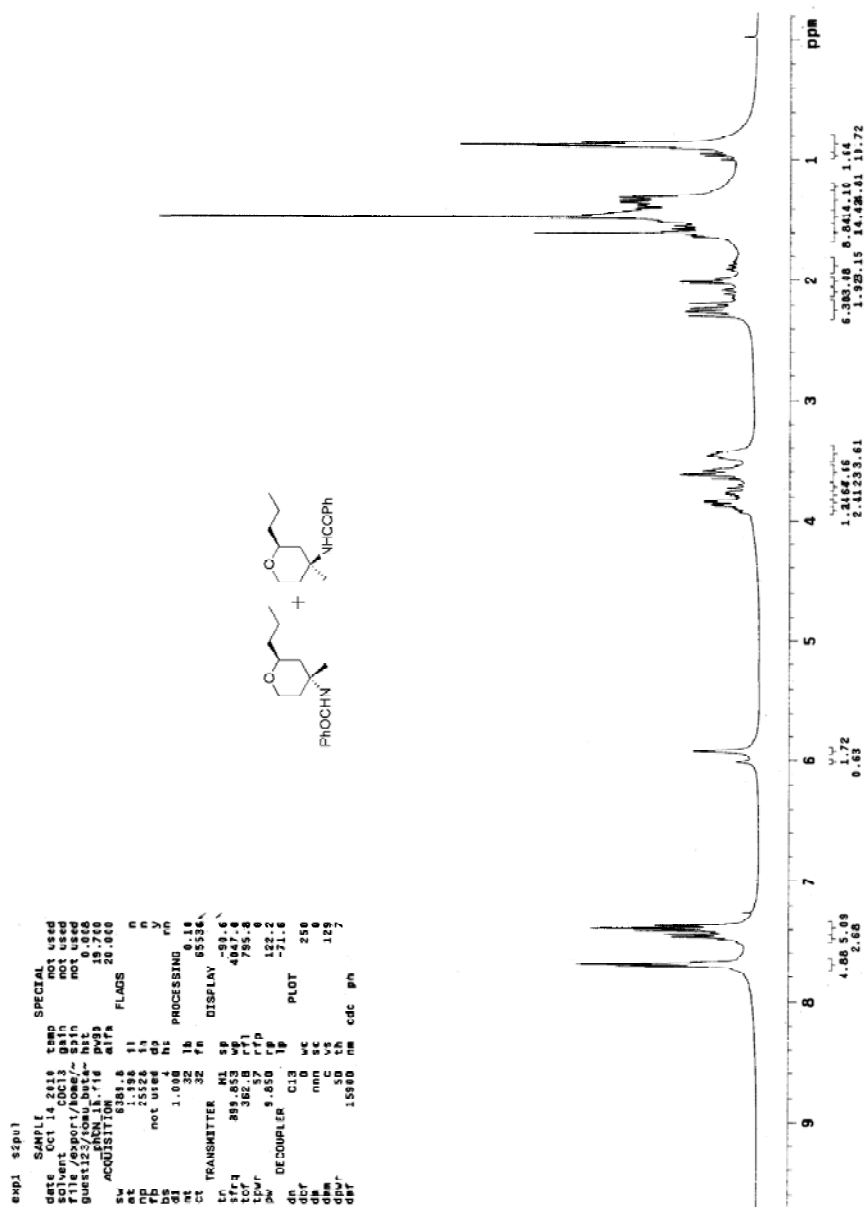

<sup>13</sup>C NMR of 17k/18k

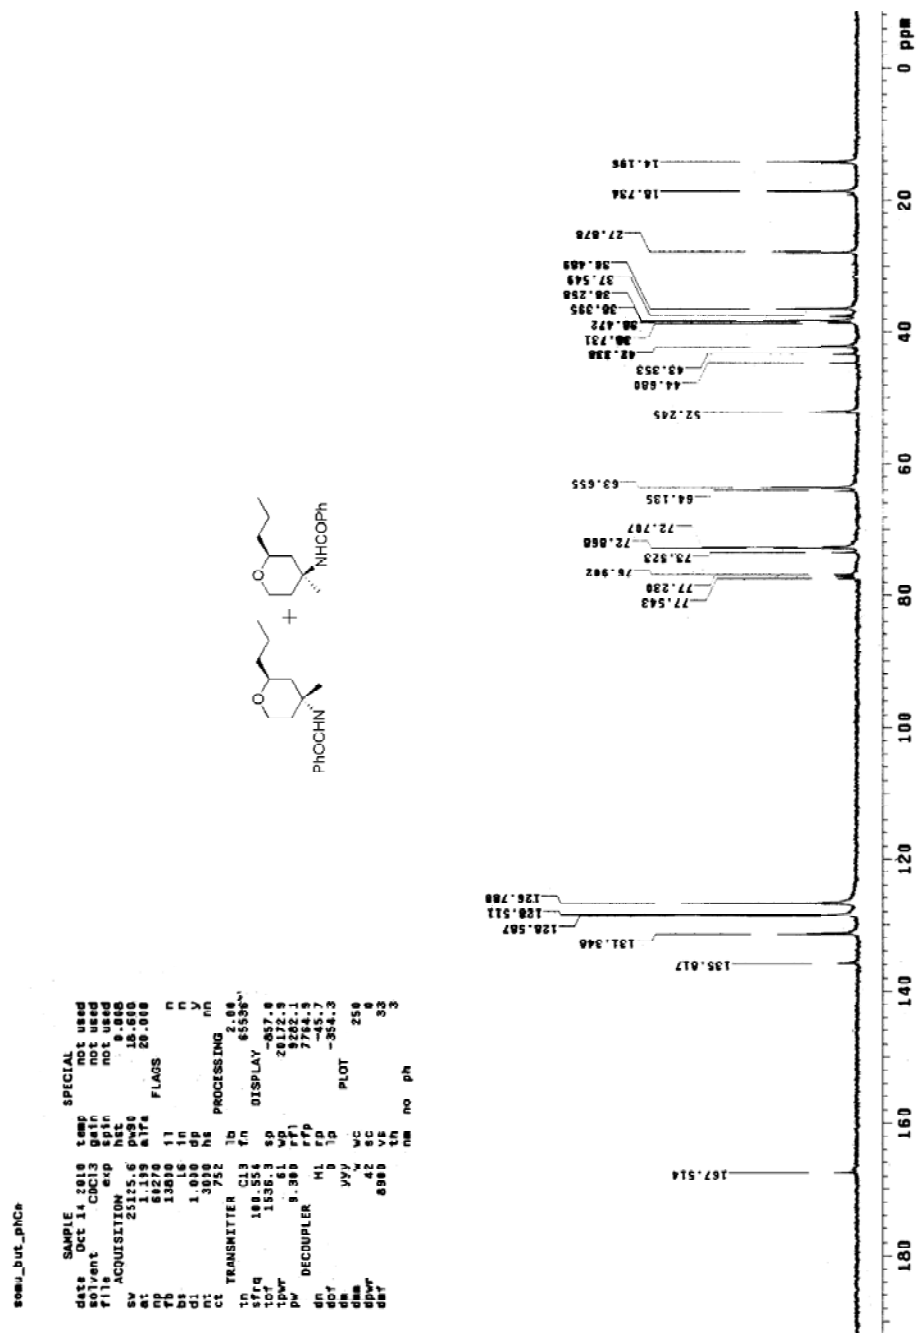





<sup>13</sup>C NMR of 17/18I

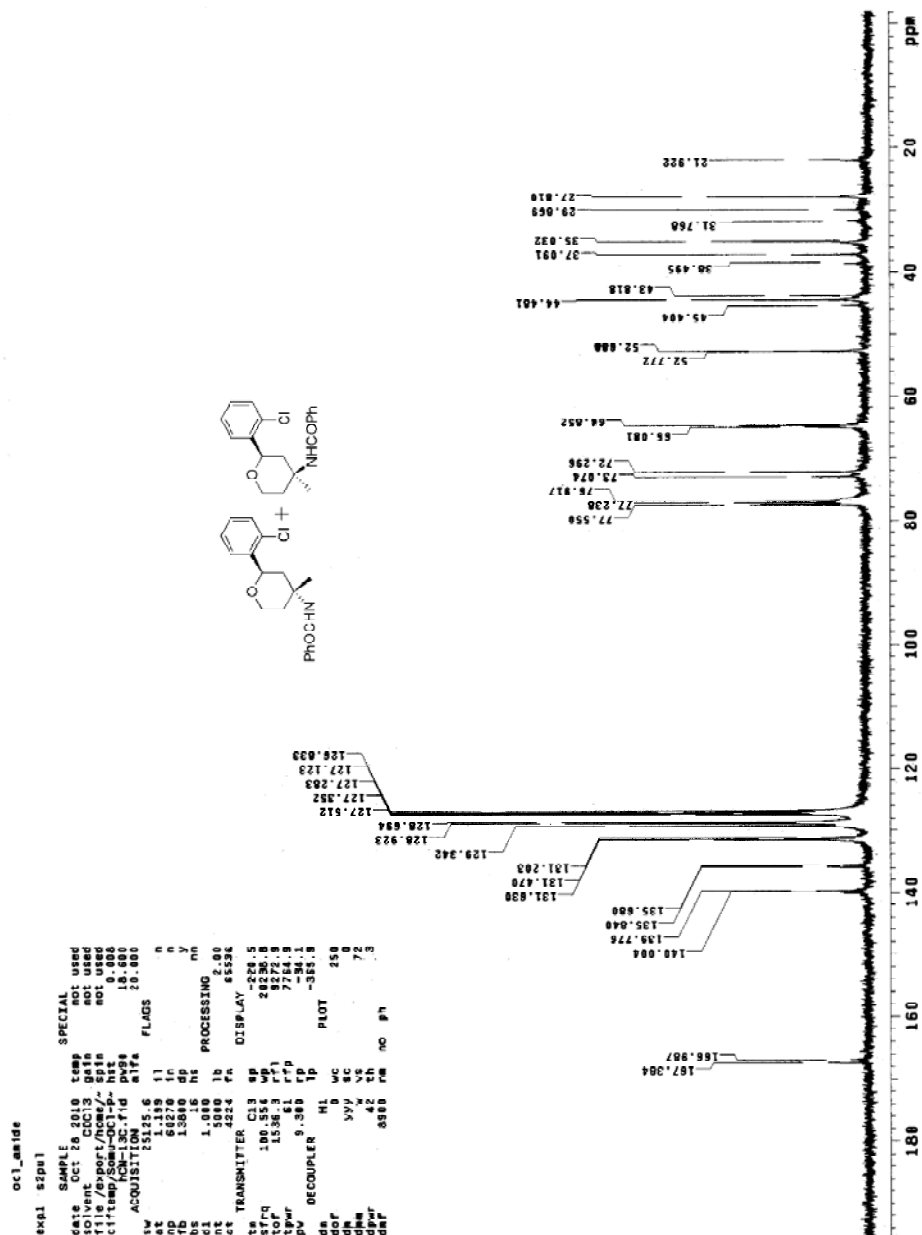

<sup>1</sup>H NMR of 17m/18m

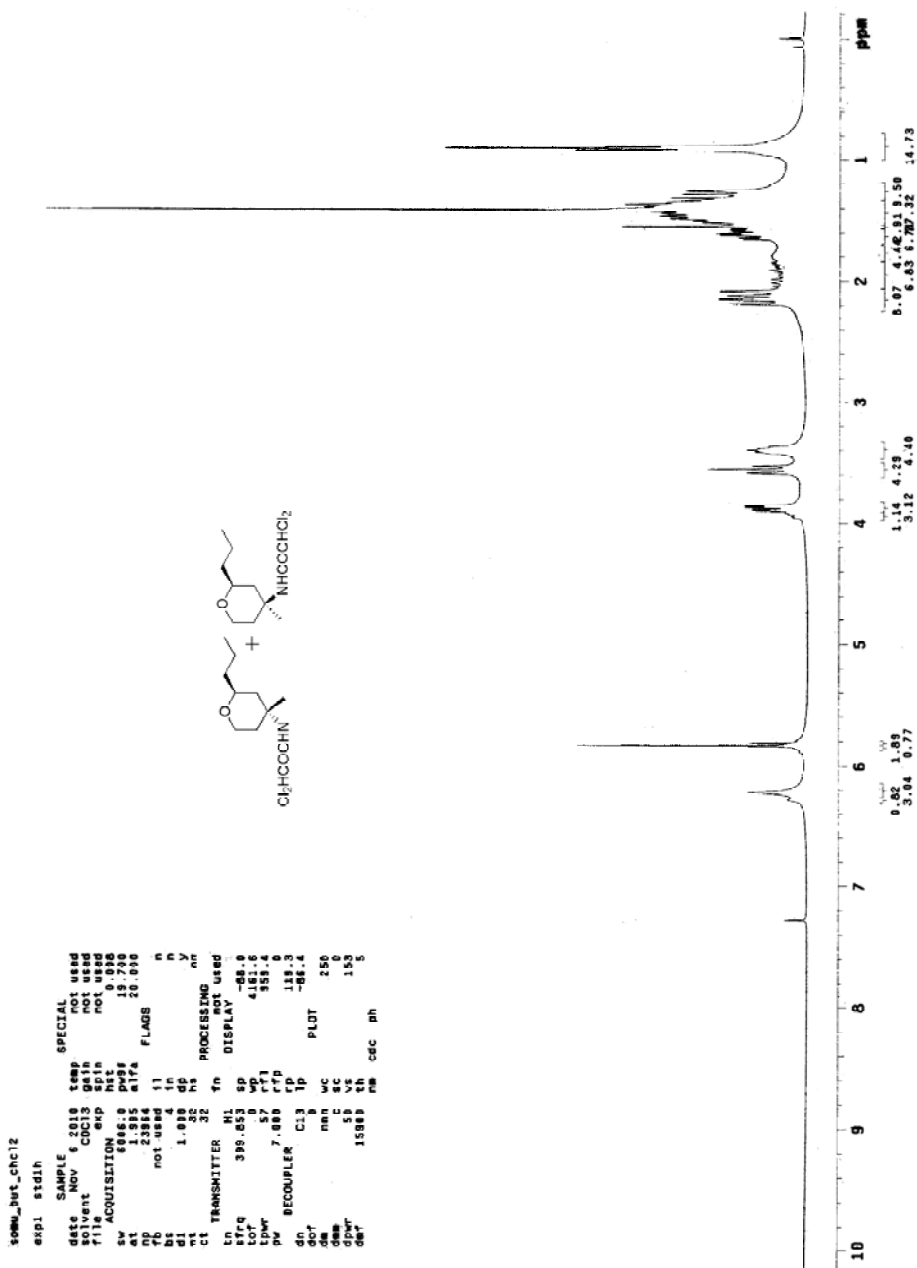



<sup>1</sup>H NMR of 17n/18n

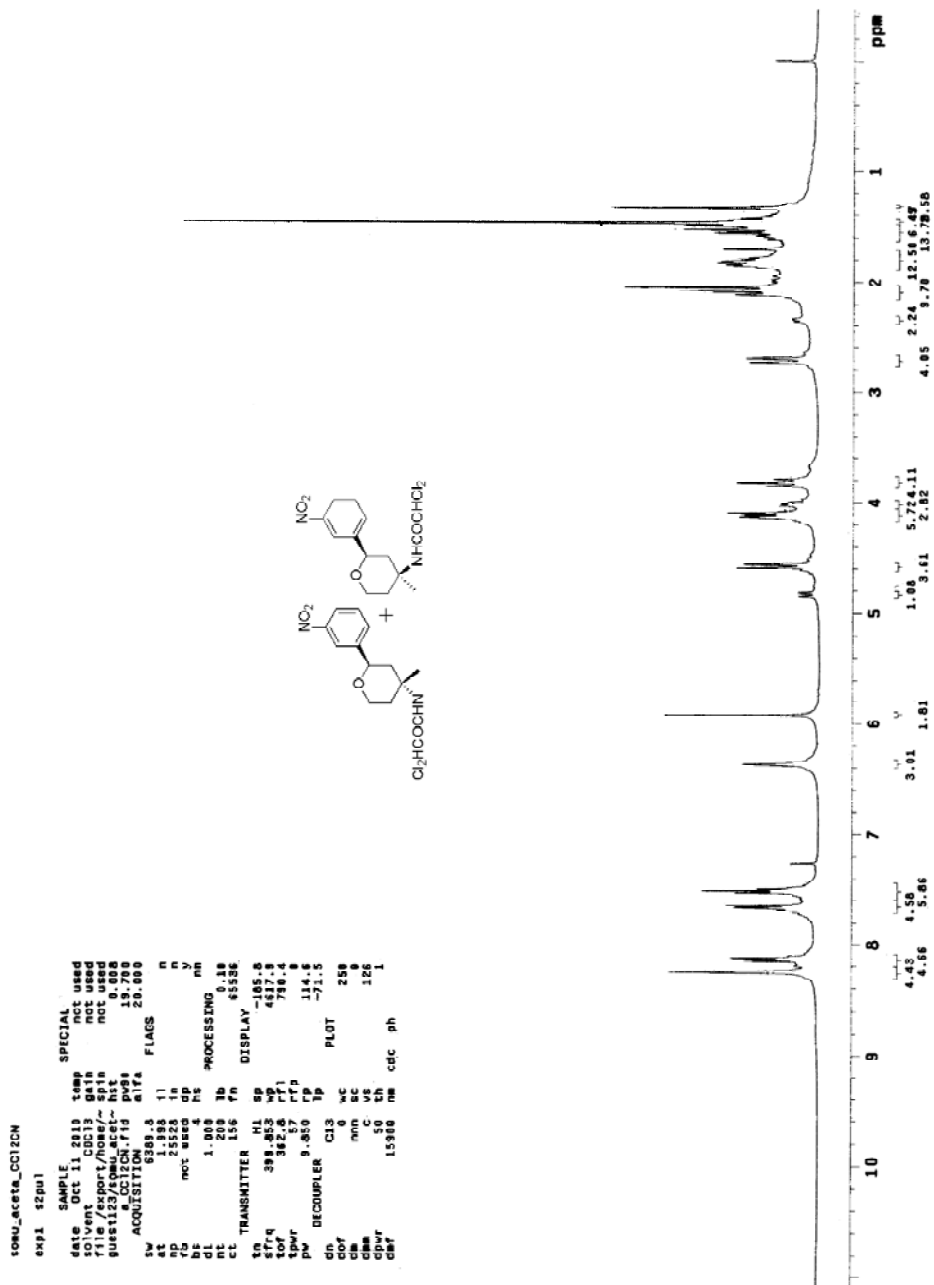

<sup>13</sup>C NMR of 17n/18n

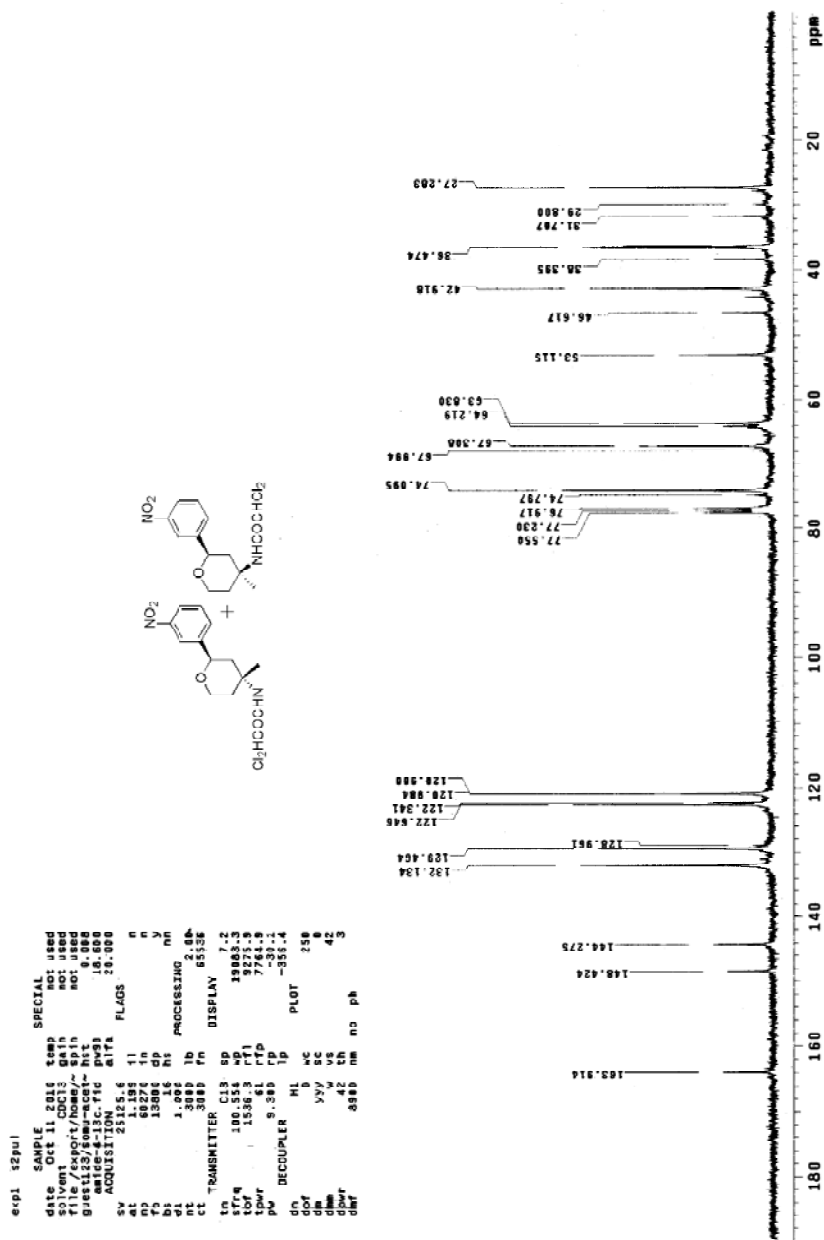

<sup>1</sup>H NMR of 17o/18o

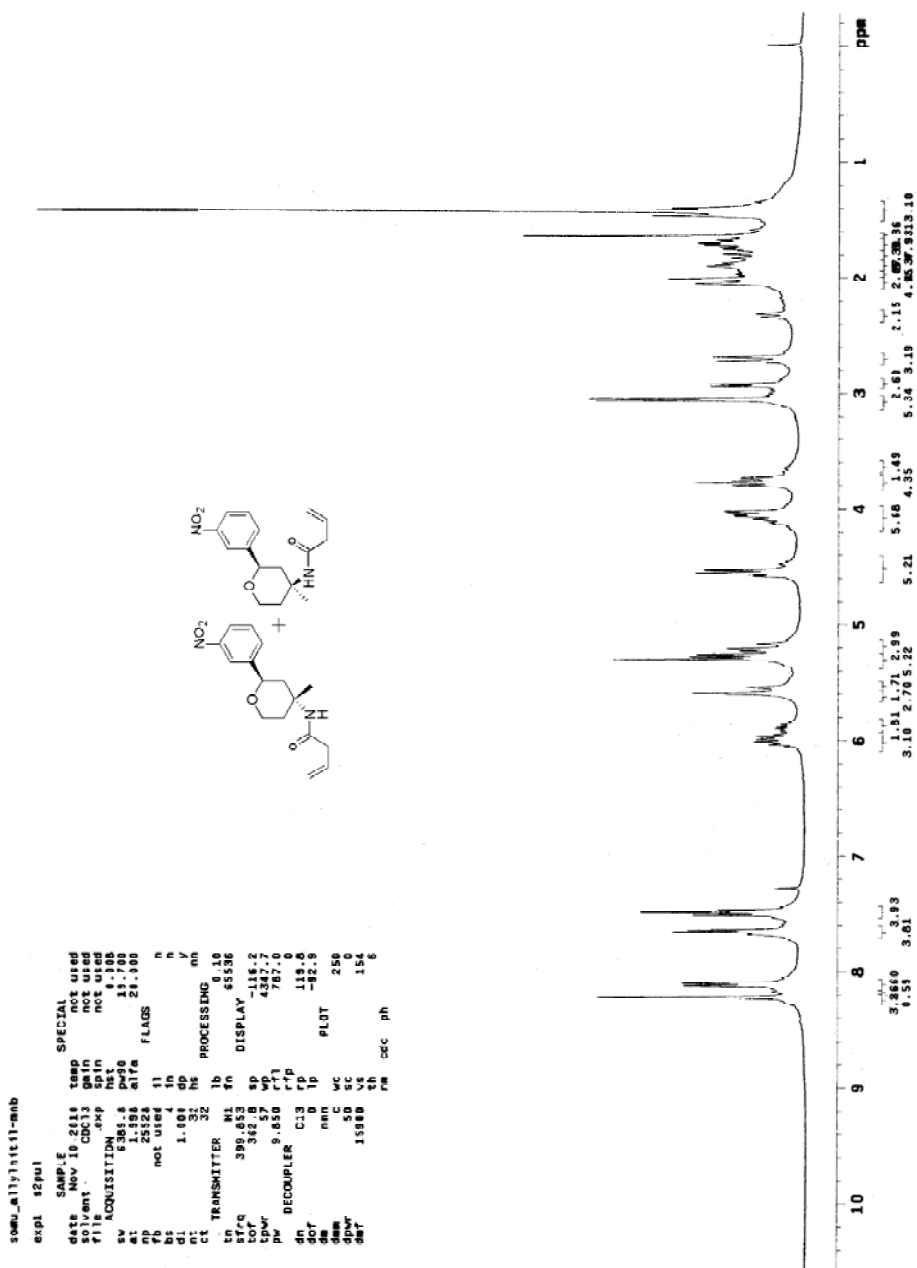

S-83

<sup>13</sup>C NMR of 17o/18o

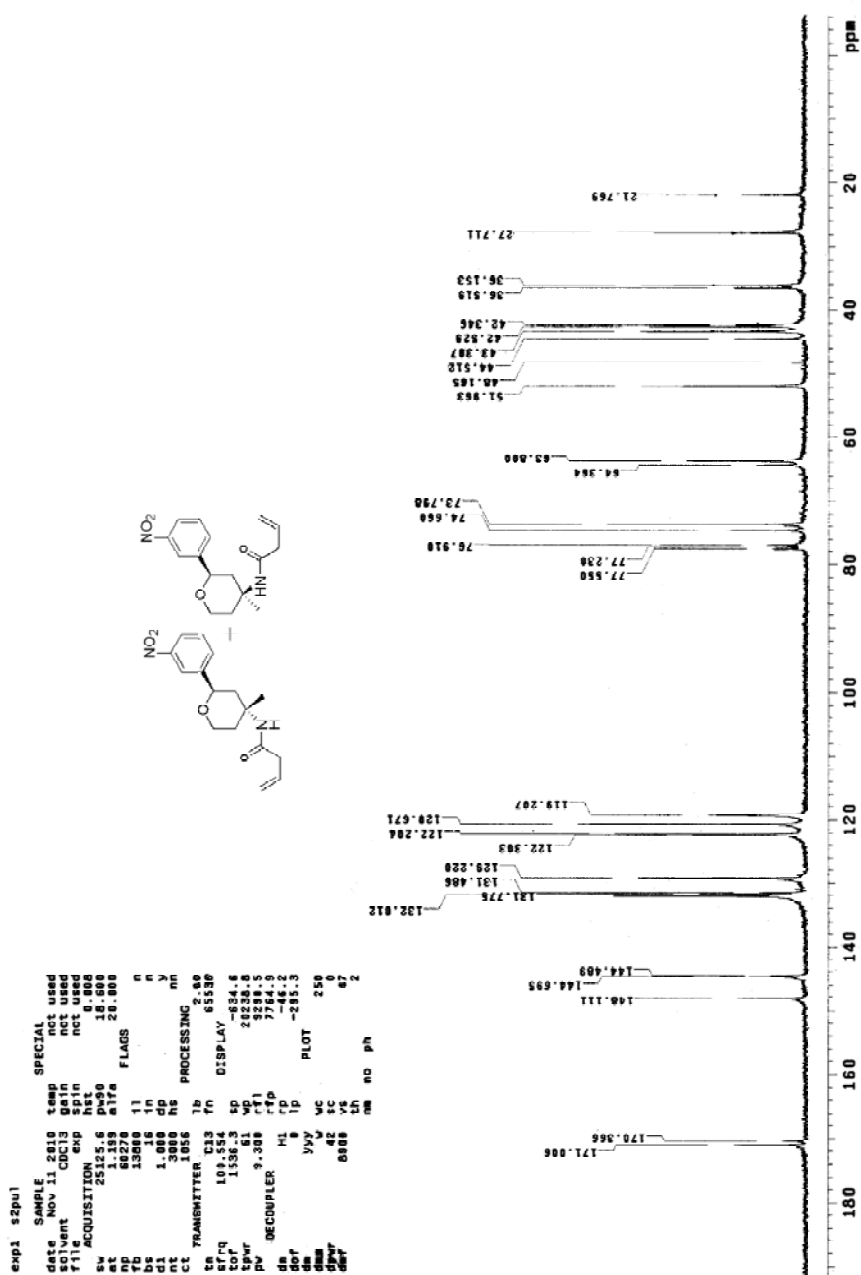

S-84



<sup>1</sup>H NMR of 17p/18p

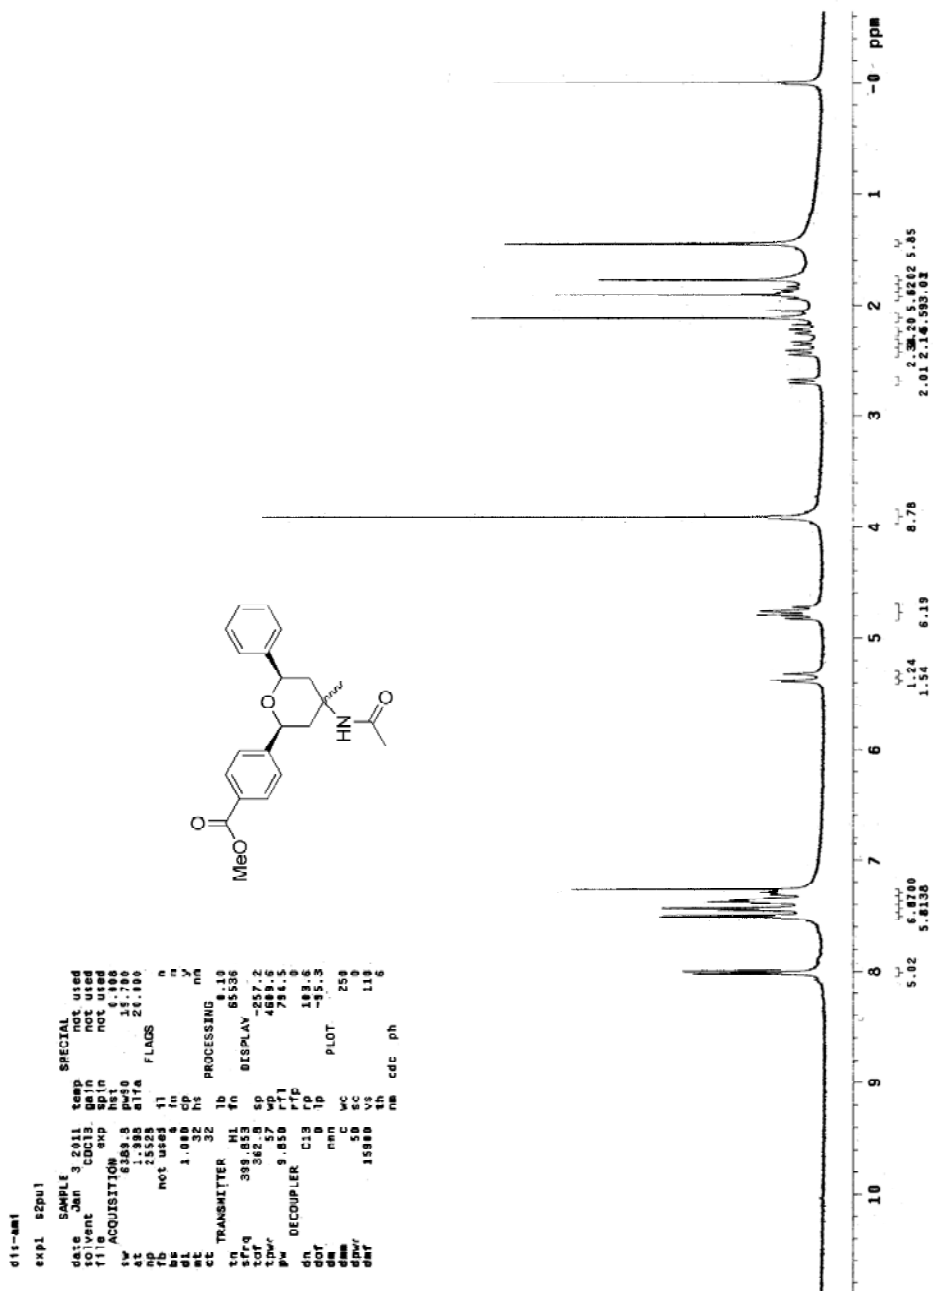

S-85

<sup>13</sup>C NMR of 17p/18p

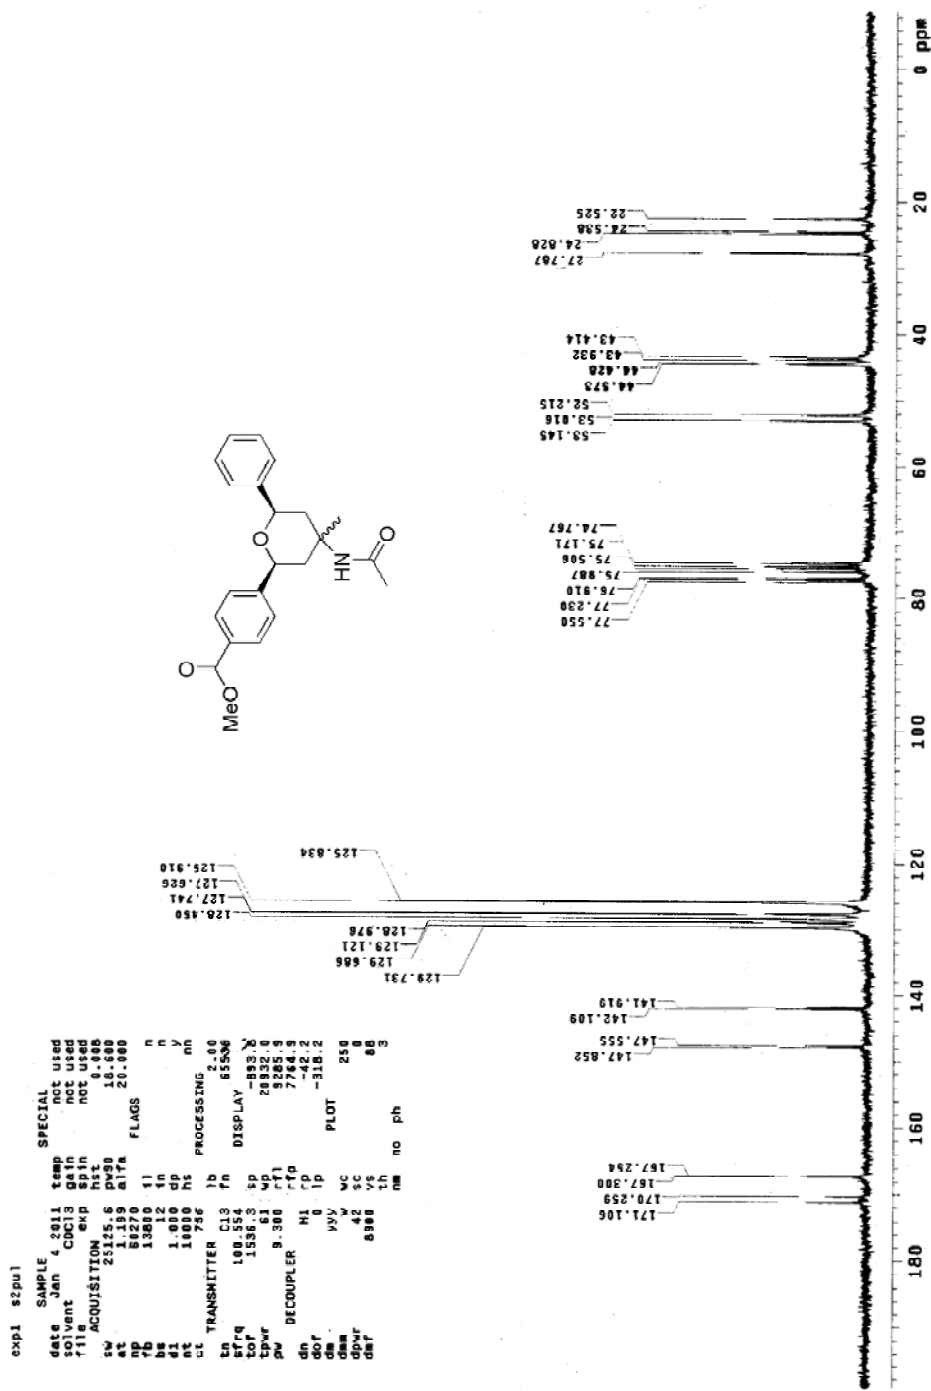

S-86

<sup>1</sup>H NMR of 17q/18q

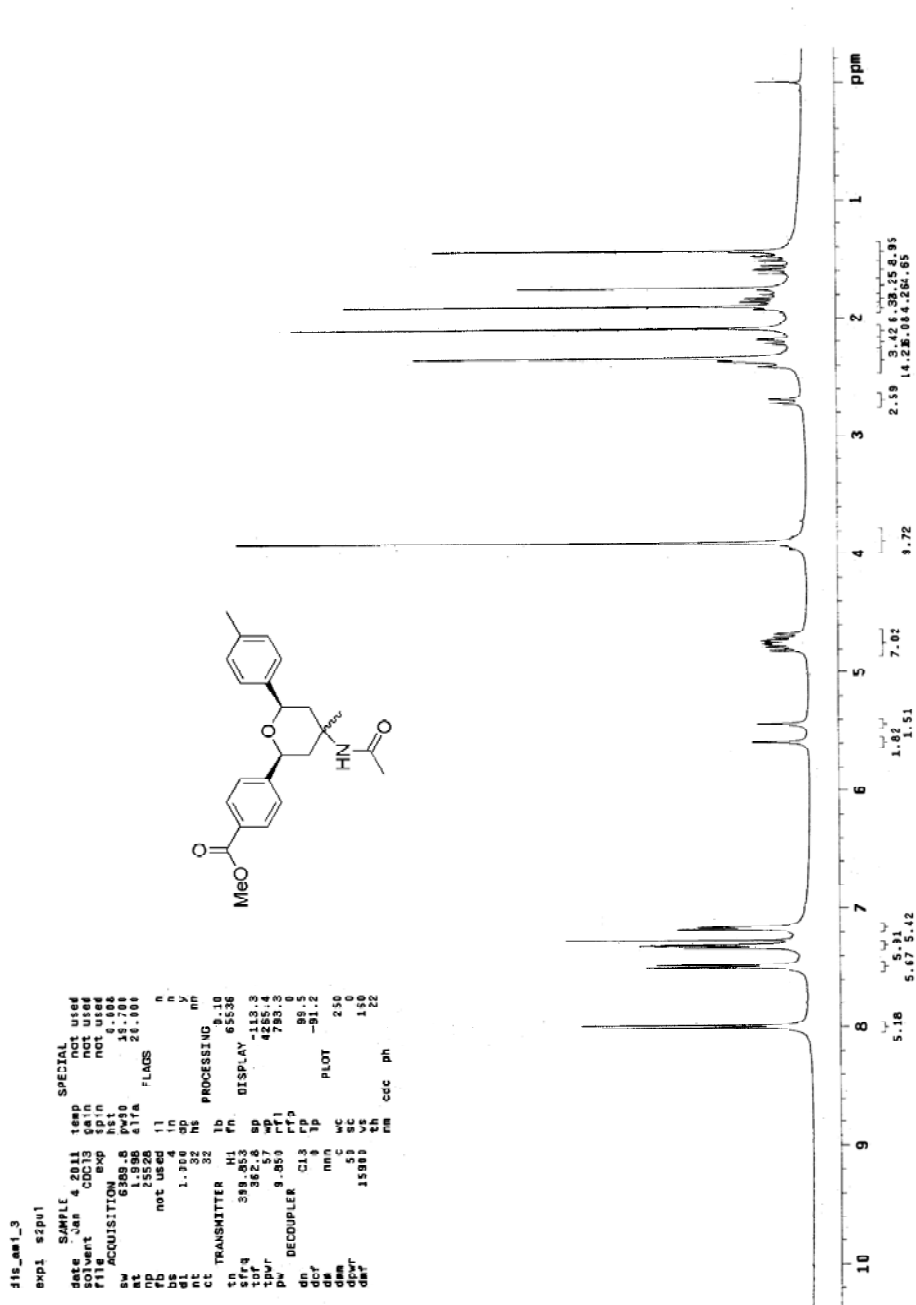

<sup>13</sup>C NMR of 17q/18q

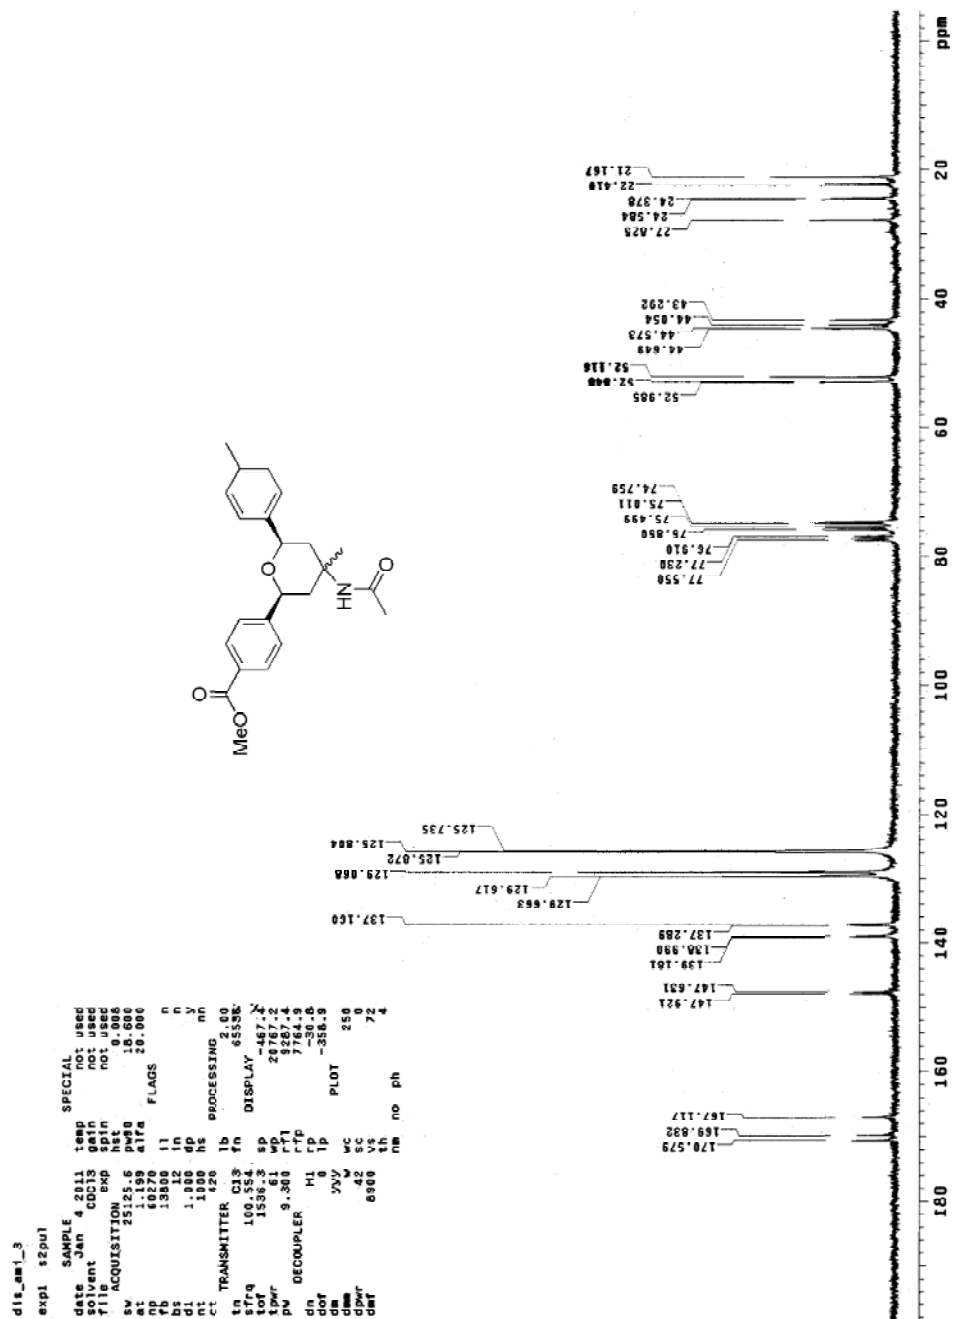

<sup>1</sup>H NMR of 17r/18r

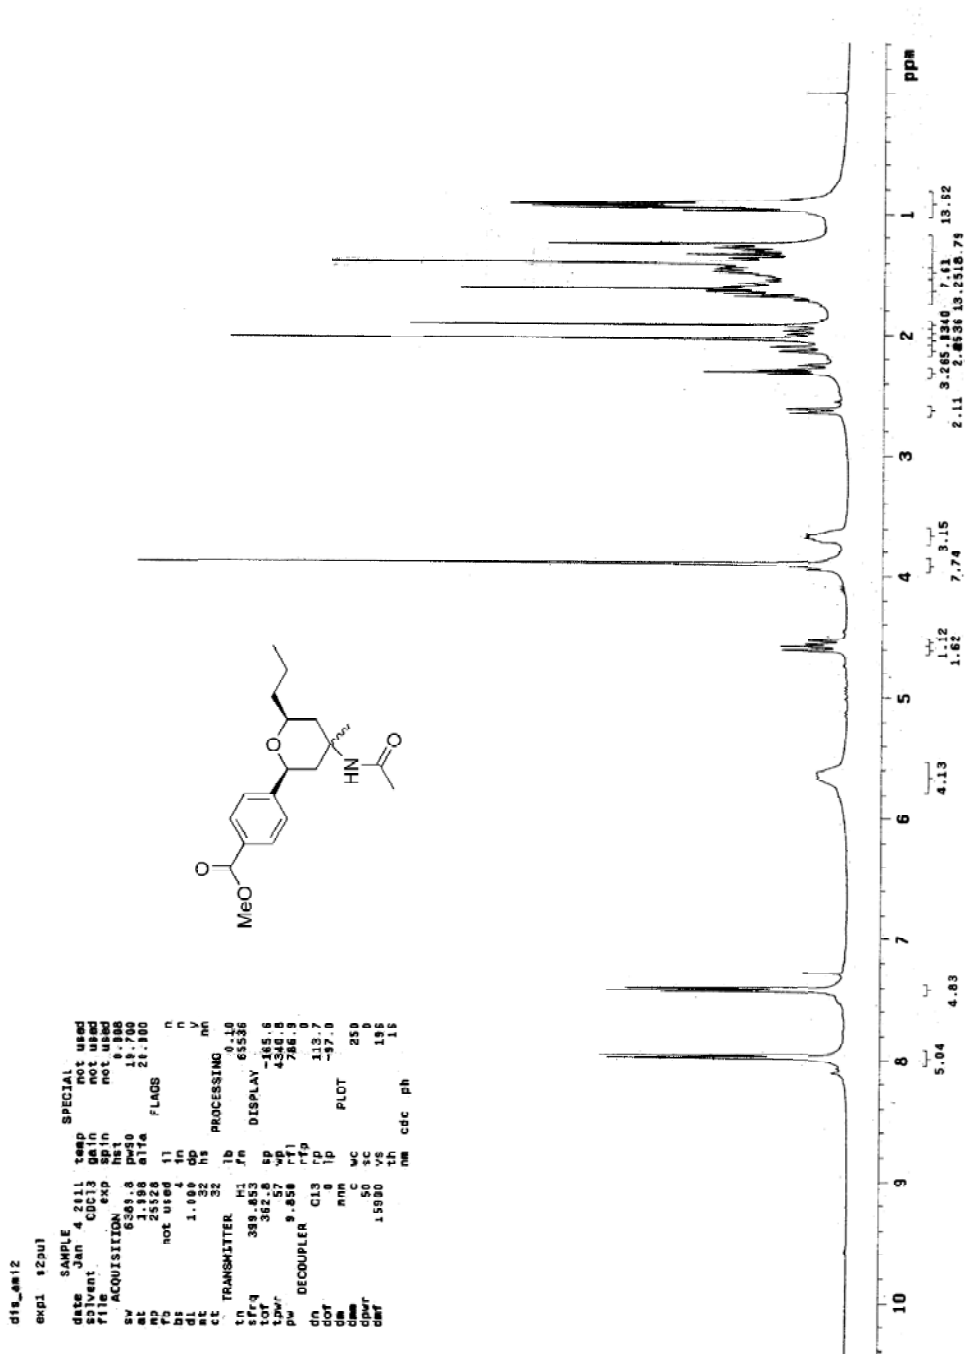

<sup>13</sup>C NMR of 17r/18r

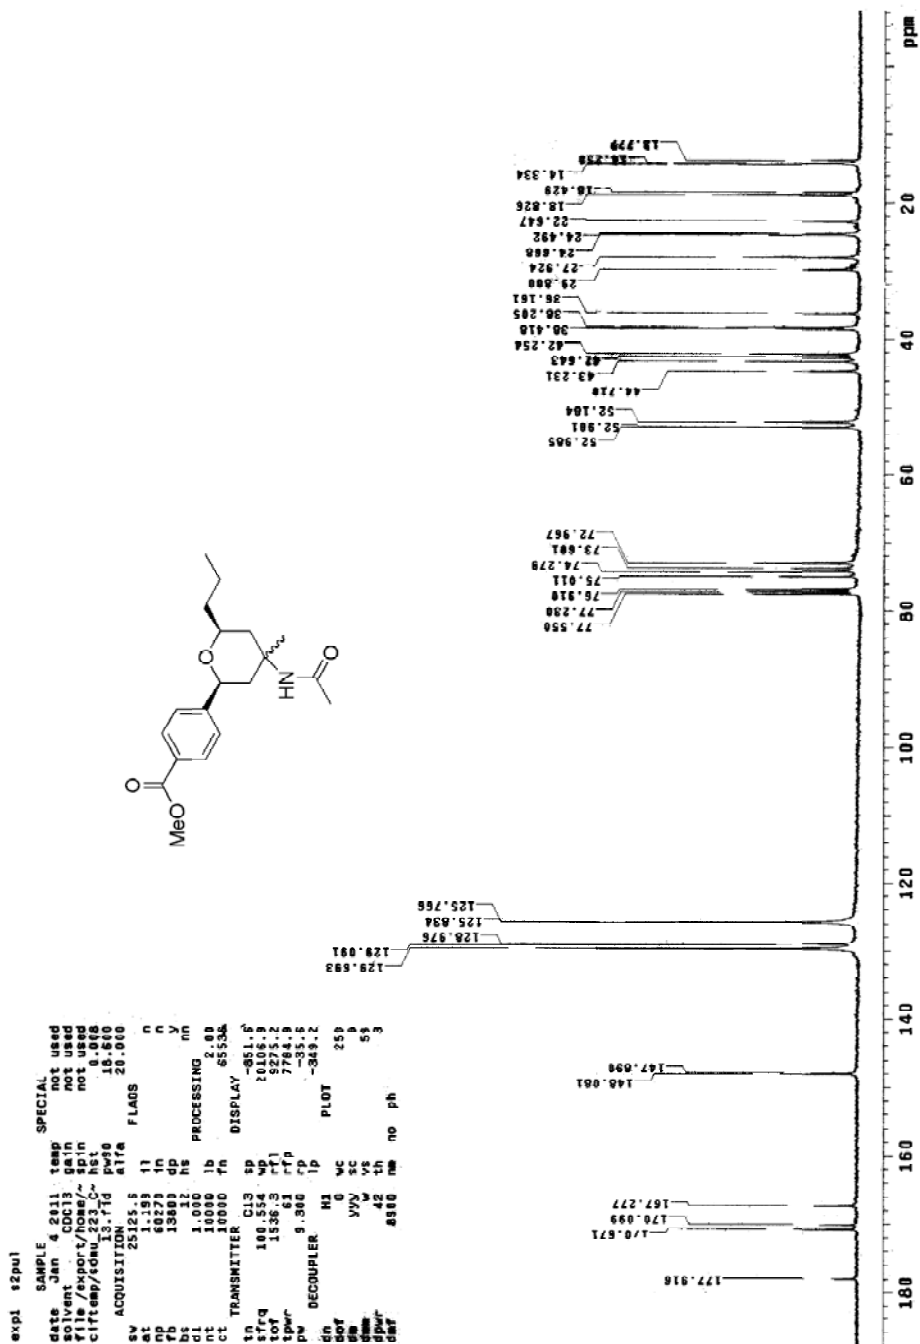

# Crude $^1\text{H}$ NMR of **8r**

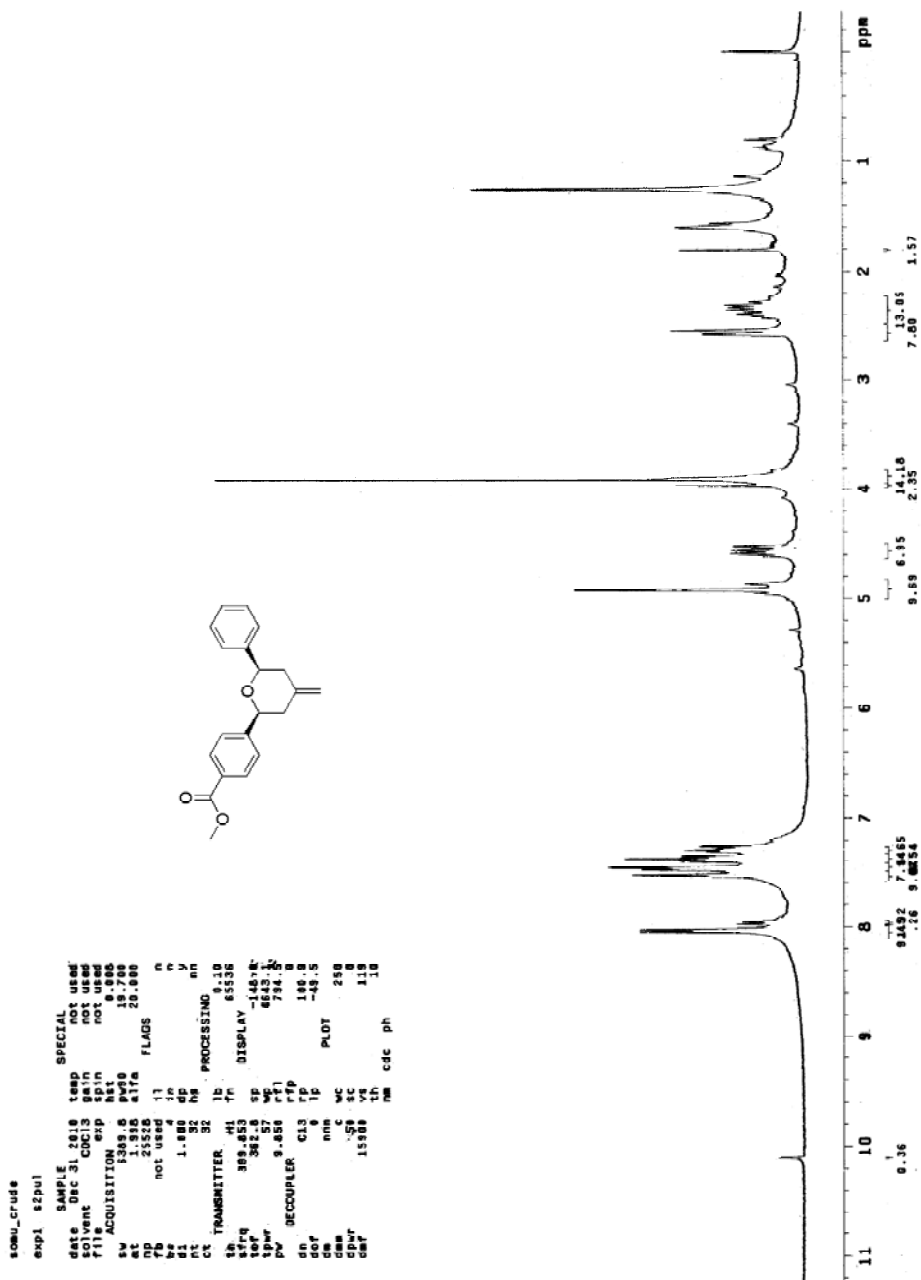

### Crystallographic data

**Figure 1:** ORTEP Diagram of “Toluene 4-sulfonic acid 4-(4-Methyl-2,3-dihydro-2*H*-pyran-2-yl) phenyl ester” **6e**

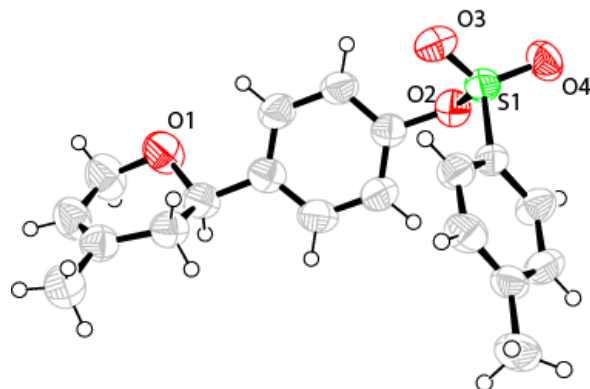



### The crystal parameters of compound **6e**

|                                                     | <b>6e- CCDC 765896</b>                    |
|-----------------------------------------------------|-------------------------------------------|
| Formula                                             | C19 H20 O4 S                              |
| Formula weight                                      | 344.41                                    |
| <i>T</i> /K                                         | 296(2)                                    |
| Crystal system                                      | Triclinic                                 |
| Space group                                         | P (1)                                     |
| <i>a</i> /Å                                         | 9.8247(5)                                 |
| <i>b</i> /Å                                         | 11.1954(6)                                |
| <i>c</i> /Å                                         | 16.1562(9)                                |
| $\alpha$ /°                                         | 101.883(3)                                |
| $\beta$ /°                                          | 95.733(3)                                 |
| $\gamma$ /°                                         | 91.650(3)                                 |
| <i>V</i> /Å <sup>3</sup>                            | 1728.04(16)                               |
| <i>Z</i>                                            | 4                                         |
| Abs. Coeff./mm <sup>-1</sup>                        | 0.207                                     |
| Abs. Correction                                     | Multi-Scan                                |
| GOF on <i>F</i> <sup>2</sup>                        | 1.007                                     |
| Final <i>R</i> indices [ <i>I</i> > 2σ( <i>I</i> )] | <i>RI</i> = 0.0514<br><i>wR2</i> = 0.1409 |
| <i>R</i> indices [all data]                         | <i>RI</i> = 0.0798<br><i>wR2</i> = 0.1578 |

**Figure 2:** ORTEP Diagram of “2-(4-Bromophenyl)-4,7-dimethyl-3,5,6,7,8,8a-hexahydro-2,4-chromene” **10**

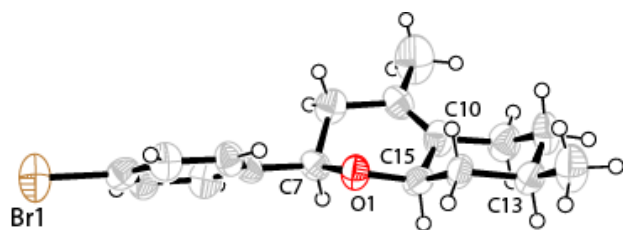

### The crystal parameters of compound 10

|                                                     | <b>10- CCDC 765895</b>                    |
|-----------------------------------------------------|-------------------------------------------|
| Formula                                             | C <sub>17</sub> H <sub>21</sub> Br O      |
| Formula weight                                      | 321.24                                    |
| <i>T</i> /K                                         | 296(2)                                    |
| Crystal system                                      | Monoclinic                                |
| Space group                                         | P2 (1)                                    |
| <i>a</i> /Å                                         | 4.7575 (2)                                |
| <i>b</i> /Å                                         | 9.8672 (4)                                |
| <i>c</i> /Å                                         | 16.6178 (6)                               |
| $\alpha$ /°                                         | 90.00                                     |
| $\beta$ /°                                          | 92.210 (2)                                |
| $\gamma$ /°                                         | 90.00                                     |
| <i>V</i> /Å <sup>3</sup>                            | 779.51 (5)                                |
| <i>Z</i>                                            | 2                                         |
| Abs. Coeff./mm <sup>-1</sup>                        | 2.628                                     |
| Abs. Correction                                     | Multi-Scan                                |
| GOF on <i>F</i> <sup>2</sup>                        | 1.077                                     |
| Final <i>R</i> indices [ <i>I</i> > 2σ( <i>I</i> )] | <i>RI</i> = 0.0525<br><i>wR2</i> = 0.1308 |
| <i>R</i> indices [all data]                         | <i>RI</i> = 0.0605<br><i>wR2</i> = 0.1449 |

**Figure 3: ORTEP Diagram of *N*-[4-Methyl-2-(3-nitrophenyl)-tetrahydropyran-4-yl]-benzamide 17j**

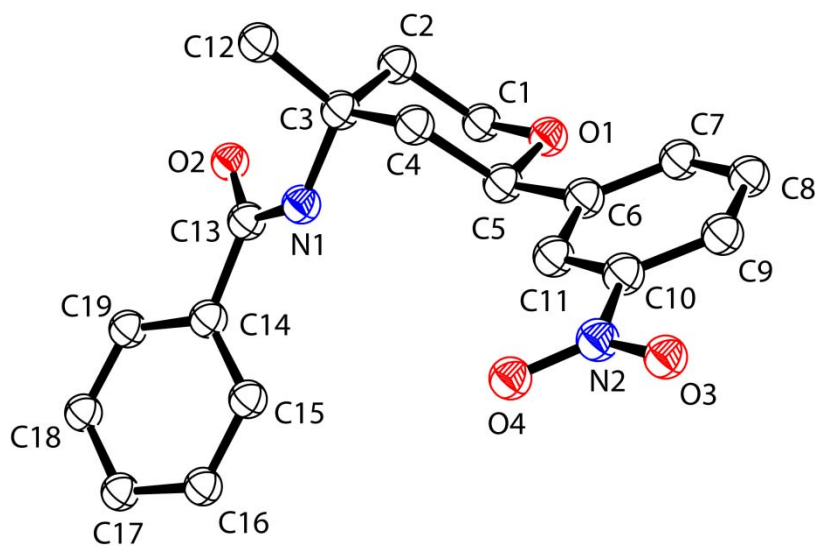

### The crystal parameters of compound 17j

|                                                     | 17j- CCDC 800377                                              |
|-----------------------------------------------------|---------------------------------------------------------------|
| Formula                                             | C <sub>19</sub> H <sub>20</sub> N <sub>2</sub> O <sub>4</sub> |
| Formula weight                                      | 340.37                                                        |
| <i>T</i> /K                                         | 296(2)                                                        |
| Crystal system                                      | Monoclinic                                                    |
| Space group                                         | P2(1)/n                                                       |
| <i>a</i> /Å                                         | 11.6207(12)                                                   |
| <i>b</i> /Å                                         | 19.274(2)                                                     |
| <i>c</i> /Å                                         | 16.3163(15)                                                   |
| $\alpha$ /°                                         | 90.00                                                         |
| $\beta$ /°                                          | 100.451(7)                                                    |
| $\gamma$ /°                                         | 90.00                                                         |
| <i>V</i> /Å <sup>3</sup>                            | 3593.8(6)                                                     |
| <i>Z</i>                                            | 8                                                             |
| Abs. Coeff./mm <sup>-1</sup>                        | 0.089                                                         |
| Abs. Correction                                     | Multi-Scan                                                    |
| GOF on <i>F</i> <sup>2</sup>                        | 1.003                                                         |
| Final <i>R</i> indices [ <i>I</i> > 2σ( <i>I</i> )] | <i>R</i> 1 = 0.0522<br><i>wR</i> 2 = 0.1180                   |
| <i>R</i> indices [all data]                         | <i>R</i> 1 = 0.0988<br><i>wR</i> 2 = 0.1411                   |
